# Supplementary material for: Distribution of Genes and Repetitive Elements in theDiabrotica virgifera virgiferaGenome Estimated Using BAC Sequencing
Source: Hindawi journal article supplement (doi:10.1155/2012/604076), 2012-01-01
Supplement: f1 [file 604076.f1.doc]

FIGURE S1: Annotation of end sequences showing assigned gene ontologies by assignments for biological process (P), cellular complement (C), and molecular function (F) are shown at GO level 2 (Note: a given sequence read may be assigned > 1 GO term).

**
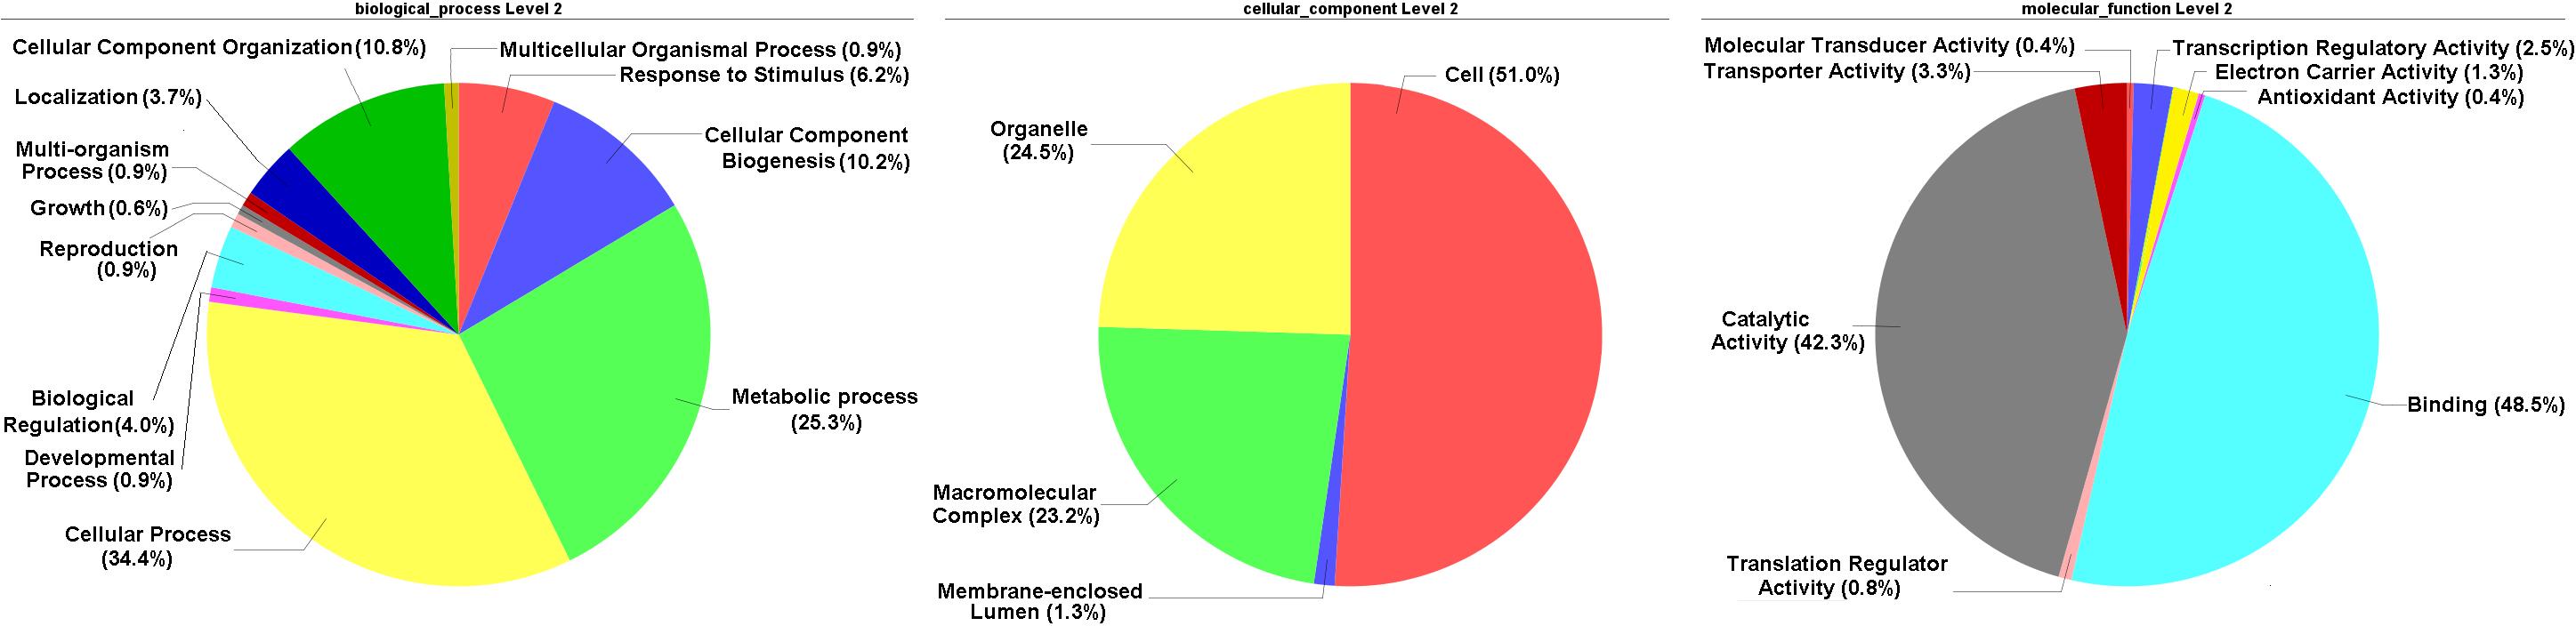
**

FIGURE S2: Annotations assigned BAC end sequence data. Results from queries of the NCBI non-redundant (nr) database conducted using the blastx (panel A) and blastn algorithms are reported (panel B). Top blast hits are shown for those with *E*-values ≥ 10-20. The "Diabrotica cadherin intron region" category consists of predicted introns with the *D. v.* *virgifera* cadherin gene sequence (EF531715.1). "Diabrotica microsatellite" category refers to identified microsatellite loci Dviz14 (EF524289.1), Dvaz 12 (EF524287.1), Dba07 (EF524283.1), Dba08 (EF524282.1), DVV-D12 (AY738542.1), DVV-ED11 (DQ867092.1), DVV-ED14 (DQ867094.1), and DVV-ET10 (DQ867100.1).

**
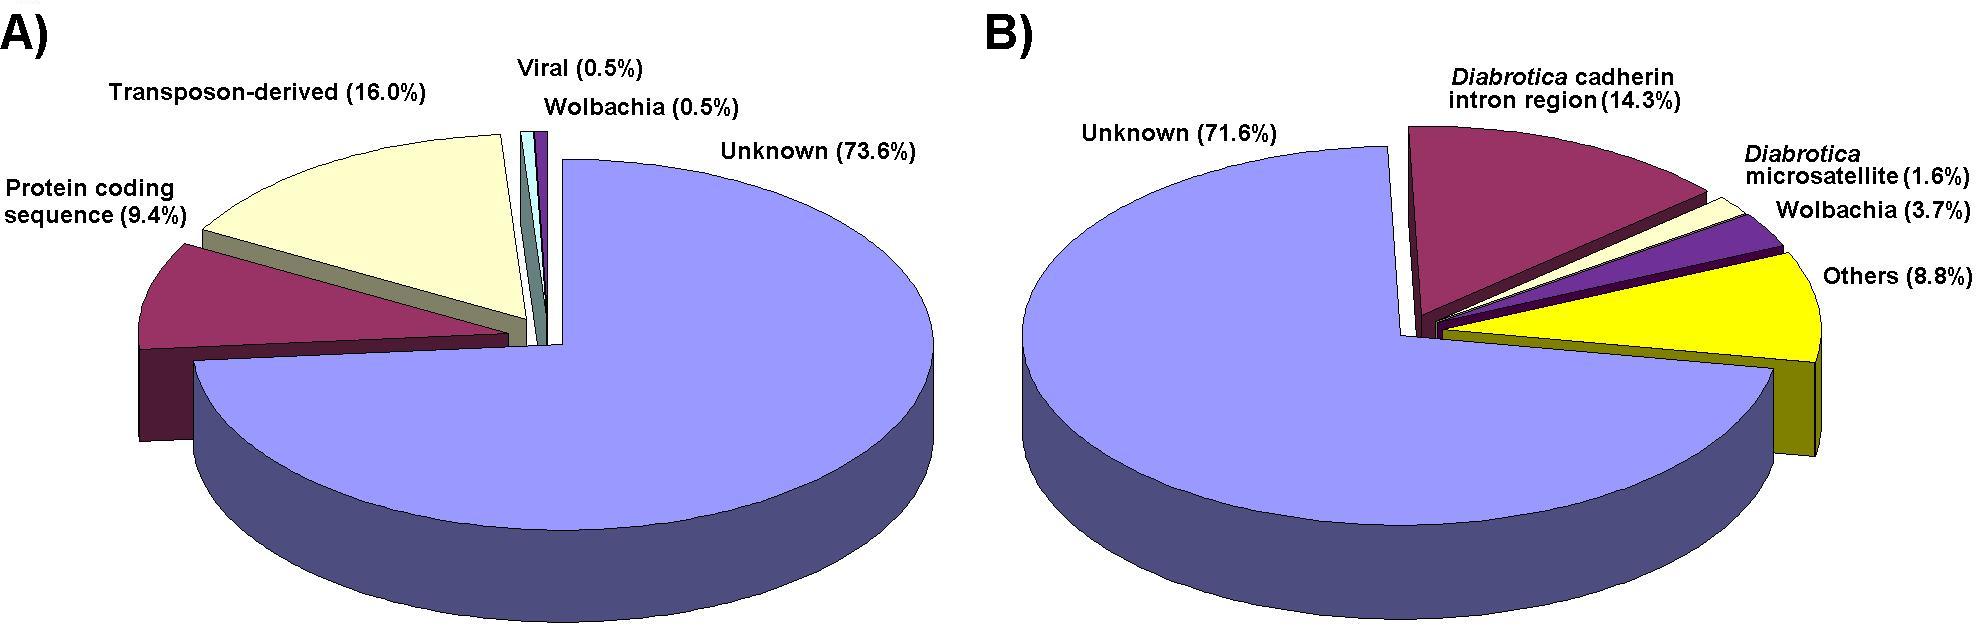
**
