# Supplementary material for: Distribution of Genes and Repetitive Elements in theDiabrotica virgifera virgiferaGenome Estimated Using BAC Sequencing
Source: Hindawi journal article supplement (doi:10.1155/2012/604076), 2012-01-01
Supplement: f2 [file 604076.f2.xls]

## Sheet: Table S1
Table S1: List of functional annotations for Diabrotica virgifera virgifera BAC end sequences
dbGSS accession	Sequence Description	Sequence Length	#Hits	min. eValue	mean Similarity	#GOs	GOs	Enzyme Codes	InterProScan
JM106058.1	---NA---	792	0			0	-		seg (SEG), tmhmm (TMHMM)
JM106695.1	hypothetical protein TcasGA2_TC004345 [Tribolium castaneum]	790	9	3.92e-25	0.61	2	F:nucleic acid binding; F:zinc ion binding		no IPS match
JM105250.1	---NA---	789	0			0	-		no IPS match
JM105977.1	---NA---	788	0			0	-		PTHR23304 (PANTHER), seg (SEG), SignalP-NN(euk) (SIGNALP), tmhmm (TMHMM)
JM106062.1	---NA---	786	0			0	-		no IPS match
JM106785.1	---NA---	785	0			0	-		SignalP-NN(euk) (SIGNALP), tmhmm (TMHMM)
JM105331.1	---NA---	785	0			0	-		no IPS match
JM105500.1	glutamyl-trna synthetase	783	20	1.05e-141	0.8245	5	C:cytoplasm; P:auxin biosynthetic process; F:glutamate-tRNA ligase activity; P:glutamyl-tRNA aminoacylation; F:ATP binding	EC:6.1.1.17	IPR000924; IPR014729; IPR020058; IPR020061; G3DSA:3.90.800.10 (GENE3D), PTHR10119:SF1 (PANTHER), SSF52374 (SUPERFAMILY)
JM105242.1	---NA---	781	0			0	-		seg (SEG)
JM105637.1	---NA---	780	0			0	-		no IPS match
JM105309.1	---NA---	778	0			0	-		SignalP-NN(euk) (SIGNALP)
JM104977.1	endonuclease-reverse transcriptase	776	20	1.09e-42	0.5835	0	-		IPR000477; PTHR19446 (PANTHER), PTHR19446:SF100 (PANTHER)
JM106778.1	---NA---	775	0			0	-		no IPS match
JM105832.1	reverse transcriptase	774	14	8.09e-30	0.55	6	F:RNA binding; P:DNA repair; P:RNA-dependent DNA replication; F:nuclease activity; C:intracellular; F:RNA-directed DNA polymerase activity		SignalP-NN(euk) (SIGNALP), tmhmm (TMHMM)
JM106190.1	---NA---	773	0			0	-		seg (SEG)
JM105339.1	---NA---	772	0			0	-		no IPS match
JM105190.1	---NA---	771	0			0	-		seg (SEG)
JM106750.1	---NA---	770	0			0	-		SignalP-NN(euk) (SIGNALP), tmhmm (TMHMM)
JM105660.1	type iv secretion system protein	770	20	1.62e-107	0.7235	2	C:membrane; P:conjugation with cellular fusion	-	IPR007688; seg (SEG), SignalP-NN(euk) (SIGNALP), tmhmm (TMHMM)
JM106306.1	endonuclease-reverse transcriptase	769	20	2.62e-50	0.588	4	F:RNA binding; P:RNA-dependent DNA replication; F:RNA-directed DNA polymerase activity; F:endonuclease activity		IPR000477; PTHR19446 (PANTHER), SSF56672 (SUPERFAMILY)
JM105973.1	reverse transcriptase ( )	769	6	1.23e-14	0.5917	3	F:RNA binding; P:RNA-dependent DNA replication; F:RNA-directed DNA polymerase activity		no IPS match
JM105779.1	hypothetical protein WD0052 [Wolbachia endosymbiont of Drosophila melanogaster]	769	4	2.94e-16	0.945	0	-		no IPS match
JM106056.1	---NA---	768	0			0	-		no IPS match
JM105989.1	endonuclease-reverse transcriptase	768	20	2.32e-64	0.5975	3	F:RNA binding; P:RNA-dependent DNA replication; F:RNA-directed DNA polymerase activity		IPR000477; PTHR19446 (PANTHER)
JM106579.1	---NA---	767	0			0	-		seg (SEG)
JM105504.1	aconitate hydratase	767	20	3.04e-98	0.8675	3	F:aconitate hydratase activity; P:tricarboxylic acid cycle; F:4 iron, 4 sulfur cluster binding	EC:4.2.1.3	IPR001030; IPR015931; IPR015934; IPR015937
JM105018.1	---NA---	765	0			0	-		SignalP-NN(euk) (SIGNALP), tmhmm (TMHMM)
JM105562.1	---NA---	764	0			0	-		no IPS match
JM106705.1	uncharacterized protein kiaa1586-like	763	20	8.3e-56	0.608	0	-		PTHR11697 (PANTHER)
JM106034.1	---NA---	761	0			0	-		no IPS match
JM105851.1	gtf2i repeat domain containing 2	761	20	2.18e-40	0.5975	5	F:zinc ion binding; C:intracellular; P:regulation of transcription; C:nucleus; F:DNA binding		IPR008906; coil (COIL), PTHR11697 (PANTHER), PTHR11697:SF38 (PANTHER), seg (SEG)
JM105025.1	---NA---	760	0			0	-		seg (SEG)
JM105852.1	isoform a	760	20	2.95e-21	1	14	F:quinone binding; F:NADH dehydrogenase (ubiquinone) activity; P:regulation of JAK-STAT cascade; C:mitochondrial respiratory chain complex I; F:metal ion binding; P:regulation of protein metabolic process; P:maintenance of apical/basal cell polarity; P:post-translational protein modification; P:negative regulation of imaginal disc growth; F:4 iron, 4 sulfur cluster binding; P:mitochondrial electr…	EC:1.6.5.3	no IPS match
JM105696.1	---NA---	759	0			0	-		seg (SEG), tmhmm (TMHMM)
JM105558.1	cyp2d6-a-prov protein	759	7	7.53e-17	0.4814	0	-		IPR005162; coil (COIL), PTHR19963 (PANTHER), PTHR19963:SF23 (PANTHER)
JM105414.1	PREDICTED: hypothetical protein LOC100167765 [Acyrthosiphon pisum]	759	5	2.09e-17	0.442	4	F:nucleic acid binding; P:DNA integration; F:zinc ion binding; F:DNA binding		no IPS match
JM104701.1	---NA---	758	0			0	-		tmhmm (TMHMM)
JM105350.1	endonuclease-reverse partial	756	20	1.22e-59	0.626	3	F:RNA binding; P:RNA-dependent DNA replication; F:RNA-directed DNA polymerase activity		IPR000477; PTHR19446 (PANTHER), PTHR19446:SF100 (PANTHER), SSF56672 (SUPERFAMILY)
JM105235.1	---NA---	756	0			0	-		no IPS match
JM106703.1	hypothetical protein SINV_12248 [Solenopsis invicta]	755	1	6.07e-11	0.6	0	-		coil (COIL), seg (SEG)
JM106470.1	---NA---	755	0			0	-		SignalP-NN(euk) (SIGNALP), tmhmm (TMHMM)
JM106382.1	---NA---	755	0			0	-		seg (SEG)
JM105135.1	pol-like protein	752	3	1.06e-15	0.4433	0	-		IPR002156; IPR012337; G3DSA:3.30.420.10 (GENE3D)
JM106139.1	endonuclease-reverse transcriptase	752	8	4.43e-30	0.4738	0	-		coil (COIL)
JM105685.1	---NA---	752	0			0	-		SignalP-NN(euk) (SIGNALP)
JM105327.1	---NA---	752	0			0	-		no IPS match
JM105687.1	---NA---	751	0			0	-		no IPS match
JM105493.1	---NA---	751	0			0	-		SignalP-NN(euk) (SIGNALP)
JM104670.1	---NA---	750	0			0	-		tmhmm (TMHMM)
JM104766.1	---NA---	749	0			0	-		no IPS match
JM104658.1	pol protein	749	20	9.1e-52	0.6505	6	F:RNA-directed DNA polymerase activity; F:RNA binding; F:nucleic acid binding; P:DNA integration; P:RNA-dependent DNA replication; F:DNA binding		coil (COIL), PTHR10178 (PANTHER), PTHR10178:SF14 (PANTHER), SSF56672 (SUPERFAMILY)
JM106274.1	---NA---	749	0			0	-		no IPS match
JM106212.1	---NA---	749	0			0	-		no IPS match
JM106077.1	general transcription factor ii-i repeat domain-containing protein 2-like	749	20	7.17e-65	0.6565	5	P:regulation of transcription; F:zinc ion binding; F:DNA binding; C:intracellular; C:nucleus		IPR012337; PTHR11697 (PANTHER), PTHR11697:SF38 (PANTHER)
JM105986.1	---NA---	749	0			0	-		no IPS match
JM105610.1	---NA---	749	0			0	-		seg (SEG)
JM105296.1	phenylacetic acid degradation protein	749	20	1.09e-105	0.908	1	F:transferase activity	-	IPR001451; IPR011004; G3DSA:2.160.10.10 (GENE3D), PTHR22572 (PANTHER), PTHR22572:SF50 (PANTHER)
JM104712.1	---NA---	748	0			0	-		no IPS match
JM105892.1	---NA---	748	0			0	-		tmhmm (TMHMM)
JM105434.1	reverse transcriptase	748	20	1.23e-48	0.557	6	F:RNA binding; P:DNA repair; P:RNA-dependent DNA replication; F:nuclease activity; C:intracellular; F:RNA-directed DNA polymerase activity		no IPS match
JM104827.1	reverse transcriptase	747	18	6.76e-39	0.5578	0	-		no IPS match
JM106432.1	---NA---	747	0			0	-		tmhmm (TMHMM)
JM105321.1	reverse transcriptase-like protein	747	20	2.66e-27	0.503	3	F:RNA binding; P:RNA-dependent DNA replication; F:RNA-directed DNA polymerase activity		PTHR19446 (PANTHER), PTHR19446:SF100 (PANTHER)
JM105113.1	---NA---	746	0			0	-		tmhmm (TMHMM)
JM105709.1	---NA---	746	0			0	-		SignalP-NN(euk) (SIGNALP)
JM105641.1	---NA---	746	0			0	-		no IPS match
JM104815.1	---NA---	745	0			0	-		no IPS match
JM104728.1	reverse ribonuclease integrase	745	20	1.29e-74	0.692	3	F:nucleic acid binding; P:macromolecule metabolic process; P:primary metabolic process	-	IPR000477; G3DSA:3.10.10.10 (GENE3D), G3DSA:3.30.70.270 (GENE3D), PTHR10178 (PANTHER), PTHR10178:SF14 (PANTHER), SSF56672 (SUPERFAMILY)
JM106052.1	---NA---	745	0			0	-		no IPS match
JM105770.1	orf a span 522-1895 first start codon at 663	745	5	1.45e-17	0.47	0	-		IPR001878; seg (SEG)
JM105575.1	reverse transcriptase	745	20	6.99e-37	0.5875	3	F:RNA binding; P:RNA-dependent DNA replication; F:RNA-directed DNA polymerase activity		IPR000477; tmhmm (TMHMM)
JM105402.1	malonyl- decarboxylase	745	20	1.35e-47	0.8495	2	F:malonyl-CoA decarboxylase activity; P:fatty acid biosynthetic process	EC:4.1.1.9	coil (COIL)
JM105399.1	aspartate carbamoyltransferase	745	20	6.39e-90	0.7595	5	P:pyrimidine ribonucleotide biosynthetic process; F:amino acid binding; P:cellular amino acid metabolic process; P:'de novo' pyrimidine base biosynthetic process; F:aspartate carbamoyltransferase activity	EC:2.1.3.2	IPR002082; IPR006130; IPR006132; G3DSA:3.40.50.1370 (GENE3D), PTHR11405 (PANTHER), PTHR11405:SF16 (PANTHER)
JM105115.1	---NA---	744	0			0	-		SignalP-NN(euk) (SIGNALP)
JM104774.1	---NA---	744	0			0	-		seg (SEG)
JM105119.1	toxin subunit	743	20	2.9e-66	0.554	2	P:oxidation reduction; C:membrane		coil (COIL), seg (SEG)
JM106153.1	---NA---	743	0			0	-		SignalP-NN(euk) (SIGNALP), tmhmm (TMHMM)
JM105867.1	endonuclease-reverse transcriptase	743	1	4.86e-13	0.45	0	-		seg (SEG), tmhmm (TMHMM)
JM105793.1	---NA---	743	0			0	-		tmhmm (TMHMM)
JM105186.1	---NA---	743	0			0	-		no IPS match
JM106314.1	uncharacterized	742	20	1.39e-60	0.69	3	F:nucleic acid binding; P:macromolecule metabolic process; P:primary metabolic process	-	IPR000477; coil (COIL), G3DSA:3.30.70.270 (GENE3D), PTHR10178 (PANTHER), PTHR10178:SF14 (PANTHER), seg (SEG), SSF56672 (SUPERFAMILY)
JM106174.1	---NA---	742	0			0	-		no IPS match
JM105774.1	pol-like protein	742	12	4.24e-25	0.5258	5	F:RNA binding; F:nucleic acid binding; P:RNA-dependent DNA replication; F:ribonuclease H activity; F:RNA-directed DNA polymerase activity		IPR002156; IPR012337; G3DSA:3.30.420.10 (GENE3D)
JM105246.1	histone -like	742	20	1.33e-35	1	4	C:nucleosome; F:DNA binding; P:nucleosome assembly; C:nucleus	-	SignalP-NN(euk) (SIGNALP), tmhmm (TMHMM)
JM105767.1	alternative oxidase	741	20	2.92e-42	0.5185	0	-		no IPS match
JM105604.1	piggybac transposase uribo1	741	10	1.12e-28	0.588	0	-		no IPS match
JM104758.1	reverse	740	11	3.31e-38	0.5345	3	F:RNA binding; P:RNA-dependent DNA replication; F:RNA-directed DNA polymerase activity		SignalP-NN(euk) (SIGNALP)
JM104685.1	---NA---	740	0			0	-		SignalP-NN(euk) (SIGNALP)
JM106064.1	---NA---	740	0			0	-		no IPS match
JM105754.1	---NA---	740	0			0	-		no IPS match
JM105613.1	endonuclease-reverse transcriptase	740	9	2.11e-25	0.6033	3	F:RNA binding; P:RNA-dependent DNA replication; F:RNA-directed DNA polymerase activity		tmhmm (TMHMM)
JM105469.1	---NA---	740	0			0	-		PTHR23304 (PANTHER), seg (SEG), SignalP-NN(euk) (SIGNALP), tmhmm (TMHMM)
JM105305.1	---NA---	740	0			0	-		seg (SEG), SignalP-NN(euk) (SIGNALP), tmhmm (TMHMM)
JM104655.1	calcium voltage- alpha2 delta subunit partial	739	5	1.22e-16	0.59	0	-		no IPS match
JM106392.1	endonuclease-reverse transcriptase	739	15	1.49e-22	0.4947	3	F:RNA binding; P:RNA-dependent DNA replication; F:RNA-directed DNA polymerase activity		no IPS match
JM105430.1	nuclease harbi1-like	739	20	6.04e-40	0.6365	2	F:molecular_function; P:biological_process		IPR006578
JM105267.1	---NA---	739	0			0	-		no IPS match
JM104666.1	rtxe_drome ame: full=probable rna-directed dna polymerase from transposon x-element ame: full=reverse transcriptase	738	20	1.82e-28	0.635	3	F:RNA binding; P:RNA-dependent DNA replication; F:RNA-directed DNA polymerase activity		no IPS match
JM106127.1	---NA---	738	0			0	-		SignalP-NN(euk) (SIGNALP), tmhmm (TMHMM)
JM105676.1	---NA---	738	0			0	-		no IPS match
JM105675.1	---NA---	738	0			0	-		no IPS match
JM105134.1	---NA---	737	0			0	-		no IPS match
JM105029.1	conserved domain protein	737	20	9.21e-49	0.9405	0	-		no IPS match
JM104929.1	---NA---	737	0			0	-		SignalP-NN(euk) (SIGNALP), tmhmm (TMHMM)
JM104897.1	---NA---	737	0			0	-		SignalP-NN(euk) (SIGNALP), tmhmm (TMHMM)
JM104887.1	zinc finger mym-type protein 1	737	14	9.59e-22	0.5257	0	-		no IPS match
JM106599.1	phosphoribosylformylglycinamidine synthase	737	20	5.27e-129	0.925	5	C:cytoplasm; P:glutamine metabolic process; P:'de novo' IMP biosynthetic process; F:ATP binding; F:phosphoribosylformylglycinamidine synthase activity	EC:6.3.5.3	seg (SEG), tmhmm (TMHMM)
JM106550.1	---NA---	737	0			0	-		tmhmm (TMHMM)
JM106471.1	adenylosuccinate synthetase	737	9	8.41e-18	0.8567	5	C:cytoplasm; F:adenylosuccinate synthase activity; P:purine nucleotide biosynthetic process; F:GTP binding; F:magnesium ion binding	EC:6.3.4.4	seg (SEG)
JM106027.1	penicillin-binding protein 2	737	20	3.82e-87	0.696	5	F:penicillin binding; F:hydrolase activity, acting on carbon-nitrogen (but not peptide) bonds; P:peptidoglycan-based cell wall biogenesis; P:cell division; P:xylan catabolic process	-	IPR005311; G3DSA:3.90.1310.10 (GENE3D), SignalP-NN(euk) (SIGNALP), tmhmm (TMHMM)
JM105785.1	---NA---	737	0			0	-		seg (SEG), SignalP-NN(euk) (SIGNALP)
JM105210.1	---NA---	737	0			0	-		SignalP-NN(euk) (SIGNALP)
JM104730.1	---NA---	736	0			0	-		no IPS match
JM106312.1	---NA---	736	0			0	-		no IPS match
JM106310.1	---NA---	736	0			0	-		seg (SEG), tmhmm (TMHMM)
JM105886.1	---NA---	736	0			0	-		no IPS match
JM105758.1	---NA---	736	0			0	-		no IPS match
JM105596.1	aconitate hydratase 2	736	20	1.31e-111	0.945	4	F:aconitate hydratase activity; P:tricarboxylic acid cycle; F:4 iron, 4 sulfur cluster binding; F:protein binding	EC:4.2.1.3	IPR015928; IPR015929; IPR015933; seg (SEG)
JM105548.1	---NA---	736	0			0	-		seg (SEG)
JM104762.1	---NA---	735	0			0	-		no IPS match
JM104743.1	---NA---	735	0			0	-		no IPS match
JM105106.1	---NA---	734	0			0	-		seg (SEG), SignalP-NN(euk) (SIGNALP), tmhmm (TMHMM)
JM104925.1	---NA---	734	0			0	-		no IPS match
JM104893.1	---NA---	734	0			0	-		no IPS match
JM106475.1	endonuclease-reverse transcriptase	734	15	1.43e-46	0.6007	10	P:cell-cell adhesion; C:lamellipodium; C:actin cytoskeleton; F:RNA binding; F:RNA-directed DNA polymerase activity; C:fascia adherens; P:RNA-dependent DNA replication; F:protein binding; F:cadherin binding; F:structural molecule activity		no IPS match
JM105924.1	---NA---	734	0			0	-		no IPS match
JM105591.1	zinc mym domain containing 1	734	11	1.91e-13	0.5855	2	F:protein dimerization activity; F:DNA binding		no IPS match
JM105206.1	63 kda sperm flagellar membrane protein	734	13	1.67e-31	0.6785	3	F:calcium ion binding; P:biological_process; C:cellular_component		seg (SEG), SignalP-NN(euk) (SIGNALP), tmhmm (TMHMM)
JM104772.1	---NA---	733	0			0	-		seg (SEG), tmhmm (TMHMM)
JM106133.1	---NA---	733	0			0	-		no IPS match
JM106129.1	methionyl-trna formyltransferase	733	20	1.05e-28	0.952	7	F:metal ion binding; F:methionyl-tRNA formyltransferase activity; P:isoleucine biosynthetic process; F:dihydroxy-acid dehydratase activity; P:valine biosynthetic process; F:4 iron, 4 sulfur cluster binding; P:translation	EC:2.1.2.9; EC:4.2.1.9; EC:3.6.5.3	IPR000581; SSF143975 (SUPERFAMILY)
JM105789.1	transcriptional regulator	732	20	1.21e-117	0.847	2	F:transcription factor activity; P:regulation of transcription, DNA-dependent	-	IPR005119; G3DSA:3.40.190.10 (GENE3D), SSF53850 (SUPERFAMILY)
JM105736.1	transcriptional regulator	732	20	1.21e-117	0.847	2	F:transcription factor activity; P:regulation of transcription, DNA-dependent	-	IPR005119; G3DSA:3.40.190.10 (GENE3D), SSF53850 (SUPERFAMILY)
JM105473.1	---NA---	732	0			0	-		no IPS match
JM106795.1	hypothetical protein WRi_007390 [Wolbachia sp. wRi]	731	7	4.04e-65	0.84	0	-		coil (COIL), seg (SEG)
JM105679.1	hypothetical protein TcasGA2_TC000010 [Tribolium castaneum]	731	1	1.51e-11	0.51	0	-		IPR005135; G3DSA:3.60.10.10 (GENE3D), seg (SEG), SignalP-NN(euk) (SIGNALP)
JM105502.1	aconitate hydratase 2	731	20	3.98e-113	0.949	4	F:aconitate hydratase activity; P:tricarboxylic acid cycle; F:4 iron, 4 sulfur cluster binding; F:protein binding	EC:4.2.1.3	IPR015928; IPR015929; IPR015933; seg (SEG)
JM106776.1	zinc finger protein	730	20	4.99e-23	0.5625	9	F:RNA binding; F:nucleic acid binding; P:DNA integration; P:RNA-dependent DNA replication; F:peptidase activity; F:RNA-directed DNA polymerase activity; F:DNA binding; P:proteolysis; F:aspartic-type endopeptidase activity		coil (COIL), PTHR10178 (PANTHER), PTHR10178:SF14 (PANTHER), SSF56672 (SUPERFAMILY)
JM106232.1	hypothetical protein WPa_0495 [Wolbachia endosymbiont of Culex quinquefasciatus Pel]	730	1	3.11e-41	0.67	0	-
JM106085.1	---NA---	730	0			0	-		no IPS match
JM105863.1	integral membrane protein	730	20	7.55e-96	0.7495	1	C:membrane	-	IPR004268; seg (SEG), tmhmm (TMHMM)
JM105298.1	---NA---	730	0			0	-		no IPS match
JM104654.1	---NA---	729	0			0	-		seg (SEG), SignalP-NN(euk) (SIGNALP), tmhmm (TMHMM)
JM106193.1	hypothetical protein SC152 [Salmonella enterica subsp. enterica serovar Choleraesuis str. SC-B67]	729	2	1.45e-22	0.57	0	-
JM105939.1	---NA---	729	0			0	-
JM105700.1	pol-like protein	729	2	1.06e-13	0.46	5	F:RNA binding; F:nucleic acid binding; P:RNA-dependent DNA replication; F:ribonuclease H activity; F:RNA-directed DNA polymerase activity
JM104886.1	---NA---	728	0			0	-
JM106687.1	---NA---	728	0			0	-
JM106390.1	---NA---	728	0			0	-
JM106237.1	---NA---	728	0			0	-
JM104933.1	---NA---	727	0			0	-
JM104901.1	---NA---	727	0			0	-
JM104810.1	nadp-dependent malic enzyme	727	20	1.38e-65	0.879	9	F:metal ion binding; F:NAD or NADH binding; C:cell outer membrane; F:malate dehydrogenase (oxaloacetate-decarboxylating) activity; P:malate metabolic process; P:oxidation reduction; C:integral to membrane; F:malate dehydrogenase (oxaloacetate-decarboxylating) (NADP+) activity; F:phosphate acetyltransferase activity	EC:1.1.1.38; EC:1.1.1.40; EC:2.3.1.8
JM105804.1	---NA---	727	0			0	-
JM105601.1	---NA---	727	0			0	-
JM105395.1	---NA---	727	0			0	-
JM105139.1	PREDICTED: hypothetical protein LOC100572977 [Acyrthosiphon pisum]	726	1	3.55e-13	0.52	0	-
JM105084.1	PREDICTED: hypothetical protein LOC100572977 [Acyrthosiphon pisum]	726	1	3.55e-13	0.52	0	-
JM106095.1	---NA---	726	0			0	-
JM106054.1	pol protein	726	20	4.15e-54	0.553	1	F:transferase activity	-
JM105946.1	endonuclease-reverse transcriptase	726	1	9.43e-17	0.66	0	-
JM105375.1	---NA---	726	0			0	-
JM105302.1	---NA---	726	0			0	-
JM105281.1	reverse transcriptase	726	20	9.97e-24	0.603	3	F:RNA binding; P:RNA-dependent DNA replication; F:RNA-directed DNA polymerase activity
JM105251.1	---NA---	726	0			0	-
JM105192.1	---NA---	726	0			0	-
JM106525.1	endonuclease-reverse transcriptase	725	19	1.57e-29	0.61	0	-
JM106168.1	---NA---	725	0			0	-
JM105927.1	endonuclease and reverse transcriptase-like protein	725	20	3.14e-56	0.5725	4	F:RNA binding; P:RNA-dependent DNA replication; F:RNA-directed DNA polymerase activity; F:endonuclease activity
JM105795.1	hypothetical protein [Wolbachia sp. wKue]	725	2	7.08e-22	0.555	0	-
JM104961.1	---NA---	724	0			0	-
JM104948.1	---NA---	724	0			0	-
JM104916.1	---NA---	724	0			0	-
JM106546.1	---NA---	724	0			0	-
JM106225.1	---NA---	724	0			0	-
JM106175.1	dna polymerase kappa	724	4	9.57e-19	0.4725	0	-
JM106141.1	---NA---	724	0			0	-
JM105900.1	---NA---	724	0			0	-
JM105485.1	chloramphenicol acetyltransferase	724	20	4.69e-58	1	2	F:chloramphenicol O-acetyltransferase activity; P:response to antibiotic	EC:2.3.1.28
JM105426.1	nadh dehydrogenase subunit g	724	20	5.25e-134	0.8305	6	F:metal ion binding; F:electron carrier activity; F:NADH dehydrogenase (ubiquinone) activity; F:4 iron, 4 sulfur cluster binding; P:ATP synthesis coupled electron transport; C:membrane	EC:1.6.5.3
JM105383.1	---NA---	724	0			0	-
JM105303.1	---NA---	724	0			0	-
JM106603.1	---NA---	723	0			0	-
JM105913.1	gap-pol poly	723	20	1.84e-62	0.6525	3	P:DNA metabolic process; F:nucleic acid binding; F:catalytic activity	-
JM105726.1	---NA---	723	0			0	-
JM105325.1	---NA---	723	0			0	-
JM104764.1	endonuclease-reverse transcriptase	722	20	2.61e-58	0.635	3	F:RNA binding; P:RNA-dependent DNA replication; F:RNA-directed DNA polymerase activity
JM104662.1	---NA---	722	0			0	-
JM106699.1	---NA---	722	0			0	-
JM106040.1	6 plasmid conjugal transfer family protein	722	10	2.78e-111	0.739	1	P:conjugation with cellular fusion	-
JM105959.1	endonuclease-reverse transcriptase	722	2	4.99e-14	0.575	0	-
JM104835.1	---NA---	721	0			0	-
JM106503.1	hypothetical protein WRi_011770 [Wolbachia sp. wRi]	721	6	2.62e-85	0.8733	0	-
JM106221.1	---NA---	721	0			0	-
JM106089.1	---NA---	721	0			0	-
JM105829.1	---NA---	721	0			0	-
JM104965.1	---NA---	720	0			0	-
JM104850.1	---NA---	720	0			0	-
JM104840.1	---NA---	720	0			0	-
JM106554.1	nuclease harbi1-like	720	20	1.26e-71	0.6305	0	-
JM106046.1	---NA---	720	0			0	-
JM105347.1	reverse transcriptase	720	5	1.33e-12	0.46	5	F:RNA binding; F:nucleic acid binding; P:RNA-dependent DNA replication; F:ribonuclease H activity; F:RNA-directed DNA polymerase activity
JM104949.1	dna pol b2 domain-containing protein	719	20	7.3e-80	0.712	0	-
JM104917.1	dna pol b2 domain-containing protein	719	20	7.3e-80	0.712	0	-
JM106050.1	malonyl- decarboxylase	719	20	2.92e-129	0.8305	2	F:malonyl-CoA decarboxylase activity; P:fatty acid biosynthetic process	EC:4.1.1.9
JM105825.1	insulinase family	719	20	3.45e-130	0.7565	3	F:metalloendopeptidase activity; P:proteolysis; F:zinc ion binding	EC:3.4.24.0
JM105678.1	---NA---	719	0			0	-
JM105343.1	histone h2b	719	20	2.09e-18	1	6	P:defense response to bacterium; C:nucleosome; F:DNA binding; P:nucleosome assembly; F:protein binding; C:nucleus	-
JM105039.1	---NA---	718	0			0	-
JM106619.1	---NA---	718	0			0	-
JM106495.1	---NA---	718	0			0	-
JM105586.1	---NA---	718	0			0	-
JM105530.1	plasmid-partitioning protein	718	20	5.15e-134	0.9775	14	P:transmembrane transport; P:response to antibiotic; F:endopeptidase activity; C:integral to membrane; P:regulation of transcription, DNA-dependent; P:oxidation reduction; F:oxygen-dependent protoporphyrinogen oxidase activity; P:proteolysis; F:tetracycline:hydrogen antiporter activity; P:plasmid partitioning; P:tetracycline transport; F:transcription factor activity; F:nucleotide binding; C:cell…	EC:1.3.3.4
JM105218.1	---NA---	718	0			0	-
JM105198.1	---NA---	718	0			0	-
JM105103.1	---NA---	717	0			0	-
JM104834.1	---NA---	717	0			0	-
JM104823.1	---NA---	717	0			0	-
JM105817.1	reverse transcriptase-like	717	9	3.33e-24	0.6511	0	-
JM105567.1	---NA---	717	0			0	-
JM104952.1	---NA---	716	0			0	-
JM104920.1	---NA---	716	0			0	-
JM104849.1	---NA---	716	0			0	-
JM104690.1	---NA---	716	0			0	-
JM106653.1	---NA---	716	0			0	-
JM106551.1	---NA---	716	0			0	-
JM106342.1	---NA---	716	0			0	-
JM105899.1	hypothetical protein TcasGA2_TC000010 [Tribolium castaneum]	716	1	4.77e-15	0.54	0	-
JM105508.1	---NA---	716	0			0	-
JM105205.1	---NA---	716	0			0	-
JM104706.1	---NA---	715	0			0	-
JM106552.1	trna modification gtpase	715	20	6.28e-108	0.9645	5	C:cytoplasm; F:metal ion binding; F:GTP binding; P:tRNA modification; F:GTPase activity	EC:3.6.5.1; EC:3.6.5.2; EC:3.6.5.3; EC:3.6.5.4
JM106045.1	---NA---	715	0			0	-
JM105940.1	---NA---	715	0			0	-
JM105862.1	catalytic core	715	20	1.42e-51	0.6985	1	F:nucleic acid binding	-
JM105698.1	---NA---	715	0			0	-
JM105580.1	---NA---	715	0			0	-
JM105300.1	---NA---	715	0			0	-
JM105456.1	hypothetical protein WD0757 [Wolbachia endosymbiont of Drosophila melanogaster]	714	12	1.36e-94	0.7458	2	P:biological_process; C:cellular_component
JM105297.1	endonuclease-reverse transcriptase	714	20	2.51e-48	0.607	0	-
JM105054.1	---NA---	713	0			0	-
JM104667.1	endonuclease-reverse transcriptase	713	15	1.24e-15	0.6433	3	F:RNA binding; P:RNA-dependent DNA replication; F:RNA-directed DNA polymerase activity
JM106726.1	---NA---	713	0			0	-
JM106607.1	hypothetical protein TcasGA2_TC010304 [Tribolium castaneum]	713	1	7.07e-11	0.58	0	-
JM106298.1	---NA---	713	0			0	-
JM106012.1	---NA---	713	0			0	-
JM105806.1	---NA---	713	0			0	-
JM105639.1	hypothetical protein DAPPUDRAFT_72393 [Daphnia pulex]	713	20	8.16e-24	0.846	0	-
JM105118.1	seryl-trna synthetase	712	20	2.27e-126	0.845	5	F:serine-tRNA ligase activity; P:selenocysteine biosynthetic process; P:seryl-tRNA aminoacylation; F:ATP binding; C:cytoplasm	EC:6.1.1.11
JM104842.1	---NA---	712	0			0	-
JM104811.1	nad-glutamate dehydrogenase family protein	712	20	4.43e-122	0.8475	3	P:oxidation reduction; F:glutamate dehydrogenase activity; F:binding	EC:1.4.1.2
JM106104.1	uncharacterized protein c6orf130-like isoform 2	712	20	2.12e-23	0.61	2	F:molecular_function; P:biological_process
JM105957.1	zinc finger mym-type protein 1-like	712	20	2.33e-38	0.568	0	-
JM105956.1	---NA---	712	0			0	-
JM105944.1	---NA---	712	0			0	-
JM105906.1	---NA---	712	0			0	-
JM105740.1	---NA---	712	0			0	-
JM105587.1	reverse	712	12	4.25e-40	0.5692	3	F:RNA binding; P:RNA-dependent DNA replication; F:RNA-directed DNA polymerase activity
JM105224.1	udp-glucuronosyltransferase 2b22	712	20	3.83e-49	0.5855	4	F:RNA binding; P:RNA-dependent DNA replication; F:RNA-directed DNA polymerase activity; F:endonuclease activity
JM105145.1	---NA---	711	0			0	-
JM104839.1	dna pol b2 domain-containing protein	711	20	2.05e-63	0.645	0	-
JM106556.1	---NA---	711	0			0	-
JM106464.1	endonuclease-reverse transcriptase	711	3	5.01e-18	0.5867	0	-
JM106154.1	---NA---	711	0			0	-
JM106147.1	---NA---	711	0			0	-
JM105498.1	---NA---	711	0			0	-
JM105292.1	PREDICTED: hypothetical protein LOC100572977 [Acyrthosiphon pisum]	711	3	1.38e-14	0.5867	0	-
JM105007.1	---NA---	710	0			0	-
JM104769.1	hypothetical protein TcasGA2_TC002606 [Tribolium castaneum]	710	3	5.18e-14	0.5667	0	-
JM106709.1	smg-7 homolog	710	2	9.76e-13	0.88	0	-
JM105975.1	---NA---	710	0			0	-
JM105841.1	---NA---	710	0			0	-
JM105616.1	endonuclease-reverse transcriptase	710	20	5.9e-26	0.5765	0	-
JM105598.1	---NA---	710	0			0	-
JM106780.1	---NA---	709	0			0	-
JM106591.1	---NA---	709	0			0	-
JM106580.1	endonuclease-reverse transcriptase	709	2	4.23e-16	0.64	0	-
JM106163.1	---NA---	709	0			0	-
JM105945.1	---NA---	709	0			0	-
JM105632.1	---NA---	709	0			0	-
JM105621.1	unnamed protein product [Tribolium castaneum]	709	20	1.27e-28	0.543	0	-
JM105006.1	beta-galactosidase alpha-peptide	708	20	8.45e-49	0.9335	0	-
JM104682.1	---NA---	708	0			0	-
JM105653.1	cg1213 cg1213-pa	708	20	1.66e-28	0.53	7	P:carbohydrate transport; F:substrate-specific transmembrane transporter activity; C:integral to membrane; C:membrane; P:transmembrane transport; P:transport; F:transporter activity
JM105492.1	beta-galactosidase alpha-peptide	708	20	8.45e-49	0.9335	0	-
JM105420.1	---NA---	708	0			0	-
JM105323.1	rna-dependent dna polymerase	708	7	9.43e-16	0.7429	0	-
JM105013.1	---NA---	707	0			0	-
JM104731.1	endonuclease-reverse transcriptase	707	20	2.71e-31	0.509	4	F:RNA binding; P:RNA-dependent DNA replication; F:RNA-directed DNA polymerase activity; F:DNA binding
JM106700.1	---NA---	707	0			0	-
JM106418.1	histone 3	707	20	1.21e-31	0.968	4	C:nucleosome; F:DNA binding; P:nucleosome assembly; C:nucleus	-
JM106300.1	---NA---	707	0			0	-
JM105984.1	---NA---	707	0			0	-
JM105798.1	enzymatic polyprotein endonuclease reverse	707	20	8.88e-75	0.726	2	F:nucleic acid binding; P:DNA metabolic process	-
JM105444.1	---NA---	707	0			0	-
JM104944.1	zinc mym domain containing 1	706	3	5.64e-29	0.5867	0	-
JM104912.1	zinc mym domain containing 1	706	3	5.64e-29	0.5867	0	-
JM106430.1	transposase	706	20	1.81e-43	0.5875	0	-
JM105983.1	pol-like protein	706	19	6.44e-33	0.5479	5	F:RNA binding; F:nucleic acid binding; P:RNA-dependent DNA replication; F:ribonuclease H activity; F:RNA-directed DNA polymerase activity
JM105792.1	---NA---	706	0			0	-
JM105432.1	reverse ribonuclease integrase	706	7	3.92e-14	0.6114	0	-
JM106779.1	gt334 protein	705	9	1.88e-24	0.5644	0	-
JM105015.1	---NA---	705	0			0	-
JM104956.1	endonuclease-reverse transcriptase	705	20	6.24e-30	0.48	7	F:RNA binding; P:RNA-dependent DNA replication; F:RNA-directed DNA polymerase activity; F:kinase activity; C:phosphoinositide 3-kinase complex; F:phosphoinositide 3-kinase regulator activity; F:protein binding
JM104754.1	zinc finger mym-type protein 1	705	20	2.63e-18	0.6785	0	-
JM104659.1	hypothetical protein WD0052 [Wolbachia endosymbiont of Drosophila melanogaster]	705	4	6.47e-17	0.91	0	-
JM106757.1	reverse transcriptase-like	705	12	3.1e-27	0.6083	0	-
JM106303.1	---NA---	705	0			0	-
JM106256.1	---NA---	705	0			0	-
JM106029.1	PREDICTED: hypothetical protein LOC100575571 [Acyrthosiphon pisum]	705	2	9.67e-13	0.73	0	-
JM105400.1	atp-dependent rna helicase	705	20	4.98e-110	0.7605	4	P:auxin biosynthetic process; F:ATP-dependent helicase activity; F:nucleic acid binding; F:ATP binding	-
JM106439.1	---NA---	704	0			0	-
JM106060.1	endonuclease-reverse transcriptase	704	20	8.88e-49	0.59	3	F:RNA binding; P:RNA-dependent DNA replication; F:RNA-directed DNA polymerase activity
JM105967.1	---NA---	704	0			0	-
JM105901.1	---NA---	704	0			0	-
JM105652.1	---NA---	704	0			0	-
JM105466.1	---NA---	704	0			0	-
JM106683.1	---NA---	703	0			0	-
JM106673.1	pol-like protein	703	6	4.08e-17	0.5183	5	F:RNA binding; F:nucleic acid binding; P:RNA-dependent DNA replication; F:ribonuclease H activity; F:RNA-directed DNA polymerase activity
JM106505.1	alternative oxidase	703	19	1.02e-38	0.5321	0	-
JM106000.1	---NA---	703	0			0	-
JM105931.1	endonuclease-reverse transcriptase	703	20	8.85e-51	0.561	4	F:RNA binding; P:RNA-dependent DNA replication; F:endonuclease activity; F:RNA-directed DNA polymerase activity
JM105773.1	zinc mym domain containing 1	703	20	4.27e-37	0.5595	2	F:protein dimerization activity; F:DNA binding
JM105573.1	cyp2d6-a-prov protein	703	6	6.84e-19	0.4867	0	-
JM105571.1	dna pol b2 domain-containing protein	703	20	3.04e-46	0.6925	0	-
JM105517.1	dna pol b2 domain-containing protein	703	20	3.04e-46	0.6925	0	-
JM105137.1	---NA---	702	0			0	-
JM105058.1	---NA---	702	0			0	-
JM104846.1	---NA---	702	0			0	-
JM106327.1	---NA---	702	0			0	-
JM106229.1	reverse transcriptase-like	702	11	4.42e-26	0.6127	0	-
JM105837.1	---NA---	702	0			0	-
JM105606.1	---NA---	702	0			0	-
JM106746.1	---NA---	701	0			0	-
JM106426.1	acyltransferase family protein	701	20	6.28e-49	0.938	3	P:transmembrane transport; P:metabolic process; F:acyltransferase activity	-
JM106294.1	---NA---	701	0			0	-
JM106191.1	---NA---	701	0			0	-
JM105617.1	endonuclease-reverse transcriptase	701	20	1.07e-40	0.494	3	F:RNA binding; P:RNA-dependent DNA replication; F:RNA-directed DNA polymerase activity
JM105255.1	---NA---	701	0			0	-
JM105203.1	---NA---	701	0			0	-
JM104844.1	---NA---	700	0			0	-
JM106506.1	---NA---	700	0			0	-
JM106436.1	endonuclease-reverse transcriptase	700	20	3.42e-54	0.692	3	F:RNA binding; P:RNA-dependent DNA replication; F:RNA-directed DNA polymerase activity
JM106253.1	---NA---	700	0			0	-
JM106213.1	pol-like protein	700	20	4.23e-29	0.514	5	F:RNA binding; F:nucleic acid binding; P:RNA-dependent DNA replication; F:ribonuclease H activity; F:RNA-directed DNA polymerase activity
JM106097.1	endonuclease-reverse transcriptase	700	3	5.75e-13	0.5633	0	-
JM105894.1	---NA---	700	0			0	-
JM105425.1	dna mismatch repair protein	700	20	1.52e-103	0.8705	4	F:protein binding; F:ATP binding; P:mismatch repair; F:mismatched DNA binding	-
JM104940.1	---NA---	699	0			0	-
JM104908.1	---NA---	699	0			0	-
JM106321.1	---NA---	699	0			0	-
JM106296.1	histone h2b	699	20	1.01e-22	0.9835	5	C:nucleosome; F:DNA binding; P:nucleosome assembly; C:lipid particle; C:NuA4 histone acetyltransferase complex	-
JM106167.1	---NA---	699	0			0	-
JM105397.1	---NA---	699	0			0	-
JM105370.1	beta-galactosidase alpha-peptide	699	20	8.2e-49	0.914	0	-
JM105219.1	---NA---	699	0			0	-
JM105035.1	---NA---	698	0			0	-
JM106004.1	---NA---	698	0			0	-
JM105972.1	---NA---	698	0			0	-
JM105699.1	pol-like protein	698	18	2.1e-37	0.5433	5	F:RNA binding; F:nucleic acid binding; P:RNA-dependent DNA replication; F:ribonuclease H activity; F:RNA-directed DNA polymerase activity
JM105129.1	transposable element tc3 transposase	697	11	6.69e-27	0.5918	4	F:transposase activity; P:DNA integration; P:transposition, DNA-mediated; F:DNA binding
JM104819.1	---NA---	697	0			0	-
JM106379.1	---NA---	697	0			0	-
JM105861.1	---NA---	697	0			0	-
JM105777.1	---NA---	697	0			0	-
JM105486.1	beta-galactosidase alpha-peptide	697	20	8.12e-49	0.919	0	-
JM105452.1	---NA---	697	0			0	-
JM104779.1	reverse ribonuclease integrase	696	20	8.42e-38	0.575	0	-
JM104736.1	retrotransposon-like family member (retr-1)-like	696	17	1.54e-23	0.5224	7	F:nucleic acid binding; F:nucleotidyltransferase activity; F:transferase activity; P:DNA integration; F:zinc ion binding; F:RNA-directed DNA polymerase activity; F:DNA binding
JM106751.1	---NA---	696	0			0	-
JM106740.1	endonuclease-reverse transcriptase	696	20	4.62e-14	0.634	3	F:RNA binding; P:RNA-dependent DNA replication; F:RNA-directed DNA polymerase activity
JM106143.1	---NA---	696	0			0	-
JM105990.1	---NA---	696	0			0	-
JM105917.1	---NA---	696	0			0	-
JM105228.1	---NA---	696	0			0	-
JM106783.1	reverse transcriptase-like	695	12	8.52e-29	0.65	0	-
JM104669.1	---NA---	695	0			0	-
JM106275.1	---NA---	695	0			0	-
JM105963.1	---NA---	695	0			0	-
JM105935.1	histone h2b	695	20	1.15e-18	0.967	5	C:nucleosome; F:DNA binding; P:nucleosome assembly; C:lipid particle; C:NuA4 histone acetyltransferase complex	-
JM105911.1	---NA---	695	0			0	-
JM105516.1	pol protein	695	20	1.75e-59	0.65	4	F:RNA binding; P:RNA-dependent DNA replication; F:endonuclease activity; F:RNA-directed DNA polymerase activity
JM106151.1	---NA---	694	0			0	-
JM106070.1	---NA---	694	0			0	-
JM106051.1	endonuclease-reverse transcriptase	694	1	1.78e-11	0.68	0	-
JM106016.1	---NA---	694	0			0	-
JM105992.1	chloramphenicol acetyltransferase	694	7	6.09e-20	0.9186	1	F:RNA-directed DNA polymerase activity	EC:2.7.7.49
JM105965.1	---NA---	694	0			0	-
JM105620.1	---NA---	694	0			0	-
JM105306.1	hypothetical protein TcasGA2_TC002010 [Tribolium castaneum]	694	6	9.1e-16	0.5017	0	-
JM105131.1	---NA---	693	0			0	-
JM104783.1	tigger transposable element derived 6-like	693	20	3.65e-57	0.626	6	P:regulation of transcription; C:chromosome, centromeric region; F:DNA binding; F:nucleic acid binding; C:nucleus; P:central nervous system development
JM104746.1	endonuclease-reverse transcriptase	693	20	4.65e-28	0.5335	0	-
JM106187.1	---NA---	693	0			0	-
JM105974.1	endonuclease-reverse transcriptase	693	20	1.44e-45	0.5865	3	F:RNA binding; P:RNA-dependent DNA replication; F:RNA-directed DNA polymerase activity
JM105475.1	reverse	693	20	9.95e-55	0.696	3	F:RNA binding; P:RNA-dependent DNA replication; F:RNA-directed DNA polymerase activity
JM106790.1	endonuclease-reverse transcriptase	692	20	1.73e-59	0.591	3	F:RNA binding; P:RNA-dependent DNA replication; F:RNA-directed DNA polymerase activity
JM105104.1	---NA---	692	0			0	-
JM104784.1	---NA---	692	0			0	-
JM104782.1	beta-galactosidase alpha-peptide	692	20	8.07e-49	0.9365	0	-
JM106453.1	histone h2b	692	20	1.94e-18	1	6	P:defense response to bacterium; C:nucleosome; F:DNA binding; P:nucleosome assembly; F:protein binding; C:nucleus	-
JM106222.1	calpain-1 catalytic subunit-like	692	6	1.39e-24	0.7467	1	F:calcium ion binding	-
JM105856.1	endonuclease-reverse transcriptase	692	20	1.73e-59	0.591	3	F:RNA binding; P:RNA-dependent DNA replication; F:RNA-directed DNA polymerase activity
JM105716.1	---NA---	692	0			0	-
JM105052.1	chloramphenicol acetyltransferase	691	20	4.23e-45	0.982	2	F:chloramphenicol O-acetyltransferase activity; P:response to antibiotic	EC:2.3.1.28
JM106724.1	---NA---	691	0			0	-
JM106567.1	reverse ribonuclease integrase	691	20	2.36e-32	0.5355	7	F:nucleic acid binding; P:DNA integration; F:DNA binding; F:RNA binding; P:RNA-dependent DNA replication; F:RNA-directed DNA polymerase activity; C:cellular_component
JM106285.1	gag-like protein	691	20	2.53e-26	0.548	0	-
JM106264.1	multifunctional fatty acid oxidation complex subunit alpha	691	20	2.15e-118	0.965	8	P:fatty acid catabolic process; F:3-hydroxyacyl-CoA dehydrogenase activity; P:oxidation reduction; F:dodecenoyl-CoA delta-isomerase activity; F:coenzyme binding; C:fatty acid beta-oxidation multienzyme complex; F:enoyl-CoA hydratase activity; F:3-hydroxybutyryl-CoA epimerase activity	EC:1.1.1.35; EC:5.3.3.8; EC:4.2.1.17; EC:5.1.2.3
JM106255.1	---NA---	691	0			0	-
JM105865.1	---NA---	691	0			0	-
JM105450.1	beta-galactosidase alpha-peptide	691	20	8.07e-49	0.919	0	-
JM105120.1	senescence-associated protein	690	16	5.45e-21	0.8163	0	-
JM105110.1	---NA---	690	0			0	-
JM104946.1	---NA---	690	0			0	-
JM104914.1	---NA---	690	0			0	-
JM104739.1	---NA---	690	0			0	-
JM106096.1	---NA---	690	0			0	-
JM105943.1	---NA---	690	0			0	-
JM105180.1	---NA---	690	0			0	-
JM104888.1	---NA---	689	0			0	-
JM106615.1	reverse transcriptase	689	20	8.88e-32	0.5315	6	F:RNA binding; P:RNA-dependent DNA replication; F:RNA-directed DNA polymerase activity; P:DNA repair; F:nuclease activity; C:intracellular
JM106419.1	histone h2b	689	20	7.55e-15	1	6	P:defense response to bacterium; C:nucleosome; F:DNA binding; P:nucleosome assembly; F:protein binding; C:nucleus	-
JM106044.1	---NA---	689	0			0	-
JM105550.1	---NA---	689	0			0	-
JM105105.1	endonuclease-reverse transcriptase	688	20	4.11e-37	0.688	2	F:binding; F:transferase activity, transferring phosphorus-containing groups	-
JM104661.1	endonuclease-reverse transcriptase	688	20	4.71e-40	0.6215	1	F:catalytic activity	-
JM106328.1	gag-pol polyprotein	688	20	1.72e-43	0.715	3	P:DNA metabolic process; F:nucleic acid binding; F:catalytic activity	-
JM106317.1	---NA---	688	0			0	-
JM106233.1	endonuclease-reverse transcriptase	688	20	8.31e-30	0.635	4	F:RNA binding; P:RNA-dependent DNA replication; F:RNA-directed DNA polymerase activity; F:endonuclease activity
JM105849.1	endonuclease-reverse transcriptase	688	20	2.65e-60	0.555	4	F:RNA binding; P:RNA-dependent DNA replication; F:endonuclease activity; F:RNA-directed DNA polymerase activity
JM105491.1	chloramphenicol acetyltransferase	688	20	1.04e-48	0.98	2	F:chloramphenicol O-acetyltransferase activity; P:response to antibiotic	EC:2.3.1.28
JM104845.1	---NA---	687	0			0	-
JM104704.1	---NA---	687	0			0	-
JM104673.1	---NA---	687	0			0	-
JM106559.1	---NA---	687	0			0	-
JM105457.1	heme exporter protein	687	20	3.89e-112	0.72	7	P:auxin biosynthetic process; P:cytochrome complex assembly; C:plasma membrane; F:ATP binding; P:heme transport; F:heme-transporting ATPase activity; C:outer membrane-bounded periplasmic space	EC:3.6.3.41
JM105142.1	hypothetical protein WD0810 [Wolbachia endosymbiont of Drosophila melanogaster]	686	1	7.22e-18	0.9	0	-
JM105141.1	phage major capsid hk97 family	686	5	3.01e-40	0.844	0	-
JM105128.1	---NA---	686	0			0	-
JM105050.1	histone h2b	686	20	1.9e-18	1	6	P:defense response to bacterium; C:nucleosome; F:DNA binding; P:nucleosome assembly; F:protein binding; C:nucleus	-
JM104816.1	---NA---	686	0			0	-
JM104674.1	---NA---	686	0			0	-
JM105878.1	hypothetical protein SINV_08178 [Solenopsis invicta]	686	6	7.18e-34	0.59	0	-
JM105313.1	---NA---	686	0			0	-
JM105017.1	---NA---	685	0			0	-
JM105005.1	chloramphenicol acetyltransferase	685	20	1.22e-49	1	2	F:chloramphenicol O-acetyltransferase activity; P:response to antibiotic	EC:2.3.1.28
JM106038.1	PREDICTED: hypothetical protein LOC100567771 [Anolis carolinensis]	685	1	4.1e-13	0.62	0	-
JM105988.1	phage uncharacterized protein	685	20	2.25e-128	0.811	1	P:biological_process
JM105958.1	endonuclease-reverse transcriptase	685	15	5.9e-30	0.628	10	P:cell-cell adhesion; C:lamellipodium; C:actin cytoskeleton; F:RNA binding; F:RNA-directed DNA polymerase activity; C:fascia adherens; P:RNA-dependent DNA replication; F:protein binding; F:cadherin binding; F:structural molecule activity
JM105907.1	---NA---	685	0			0	-
JM105645.1	---NA---	685	0			0	-
JM105501.1	uncharacterized protein	685	18	3.37e-116	0.84	0	-
JM105308.1	---NA---	685	0			0	-
JM105014.1	---NA---	684	0			0	-
JM104836.1	---NA---	684	0			0	-
JM106588.1	cobalamin-5-phosphate synthase	684	20	1.12e-103	0.8755	6	P:cobalamin biosynthetic process; C:plasma membrane; F:cobalamin-transporting ATPase activity; C:integral to membrane; F:cobalamin 5'-phosphate synthase activity; F:adenosylcobinamide-GDP ribazoletransferase activity	EC:3.6.3.33; EC:2.7.8.26
JM106570.1	---NA---	684	0			0	-
JM106231.1	ribonucleotide-diphosphate reductase subunit beta	684	20	8.03e-110	0.909	5	F:transition metal ion binding; P:oxidation reduction; F:acyl-[acyl-carrier-protein]-UDP-N-acetylglucosamine O-acyltransferase activity; F:ribonucleoside-diphosphate reductase activity; P:deoxyribonucleoside diphosphate metabolic process	EC:2.3.1.129; EC:1.17.4.1
JM105759.1	---NA---	684	0			0	-
JM105597.1	---NA---	684	0			0	-
JM104657.1	bel12_ag transposon polyprotein	683	20	9.94e-28	0.6075	1	F:binding	-
JM106249.1	---NA---	683	0			0	-
JM106248.1	---NA---	683	0			0	-
JM105692.1	uncharacterized	683	20	2.96e-64	0.6605	1	F:nucleic acid binding	-
JM105510.1	PREDICTED: hypothetical protein LOC100567771 [Anolis carolinensis]	683	1	4.05e-13	0.62	0	-
JM105369.1	chloramphenicol acetyltransferase	683	20	7.09e-42	0.964	2	F:chloramphenicol O-acetyltransferase activity; P:response to antibiotic	EC:2.3.1.28
JM105189.1	hypothetical protein EAI_04605 [Harpegnathos saltator]	683	1	2.01e-12	0.71	0	-
JM106766.1	---NA---	682	0			0	-
JM105022.1	---NA---	682	0			0	-
JM105016.1	---NA---	682	0			0	-
JM104781.1	chloramphenicol acetyltransferase	682	20	4.6e-41	0.784	2	F:chloramphenicol O-acetyltransferase activity; P:response to antibiotic	EC:2.3.1.28
JM106738.1	---NA---	682	0			0	-
JM106707.1	---NA---	682	0			0	-
JM106359.1	---NA---	682	0			0	-
JM106281.1	---NA---	682	0			0	-
JM105824.1	---NA---	682	0			0	-
JM105811.1	---NA---	682	0			0	-
JM105536.1	beta-galactosidase alpha-peptide	682	20	7.82e-49	0.9335	0	-
JM105438.1	---NA---	682	0			0	-
JM105406.1	PREDICTED: hypothetical protein LOC100569183 [Acyrthosiphon pisum]	682	1	5.85e-12	0.49	0	-
JM105268.1	---NA---	682	0			0	-
JM105098.1	---NA---	681	0			0	-
JM104963.1	hypothetical protein TcasGA2_TC005152 [Tribolium castaneum]	681	7	6.26e-14	0.5971	0	-
JM104671.1	---NA---	681	0			0	-
JM106719.1	---NA---	681	0			0	-
JM106609.1	---NA---	681	0			0	-
JM106420.1	---NA---	681	0			0	-
JM106295.1	---NA---	681	0			0	-
JM106128.1	---NA---	681	0			0	-
JM105844.1	---NA---	681	0			0	-
JM105656.1	---NA---	681	0			0	-
JM105605.1	dna-mediated transposase	681	3	8.43e-19	0.5933	4	F:transposase activity; P:DNA integration; P:transposition, DNA-mediated; F:DNA binding
JM105398.1	---NA---	681	0			0	-
JM105193.1	---NA---	681	0			0	-
JM104889.1	---NA---	680	0			0	-
JM104825.1	gag partial	680	15	1.52e-28	0.548	3	F:metal ion binding; F:nucleic acid binding; F:zinc ion binding
JM106739.1	---NA---	680	0			0	-
JM106679.1	histone h1	680	20	3.49e-33	0.917	4	C:nucleosome; F:DNA binding; P:nucleosome assembly; C:nucleus	-
JM106145.1	---NA---	680	0			0	-
JM105998.1	---NA---	680	0			0	-
JM105495.1	---NA---	680	0			0	-
JM105286.1	membrane protein	680	1	2.39e-66	0.71	3	F:nucleic acid binding; F:ATP binding; F:ATP-dependent helicase activity
JM105282.1	---NA---	680	0			0	-
JM105199.1	---NA---	680	0			0	-
JM105101.1	---NA---	679	0			0	-
JM105476.1	---NA---	679	0			0	-
JM105185.1	---NA---	679	0			0	-
JM105160.1	---NA---	678	0			0	-
JM104945.1	---NA---	678	0			0	-
JM104913.1	---NA---	678	0			0	-
JM104765.1	---NA---	678	0			0	-
JM106462.1	---NA---	678	0			0	-
JM106101.1	---NA---	678	0			0	-
JM106007.1	endonuclease-reverse transcriptase	678	20	5.58e-19	0.5965	4	F:RNA binding; P:RNA-dependent DNA replication; F:RNA-directed DNA polymerase activity; F:endonuclease activity
JM105831.1	---NA---	678	0			0	-
JM105243.1	maverick atpase	678	20	1.78e-61	0.6315	0	-
JM105149.1	chloramphenicol acetyltransferase	677	20	5.48e-47	0.98	2	F:chloramphenicol O-acetyltransferase activity; P:response to antibiotic	EC:2.3.1.28
JM104997.1	---NA---	677	0			0	-
JM104951.1	endonuclease-reverse transcriptase	677	12	1.04e-29	0.49	3	F:RNA binding; P:RNA-dependent DNA replication; F:RNA-directed DNA polymerase activity
JM104919.1	endonuclease-reverse transcriptase	677	12	1.04e-29	0.49	3	F:RNA binding; P:RNA-dependent DNA replication; F:RNA-directed DNA polymerase activity
JM104744.1	reverse ribonuclease integrase	677	20	1.44e-63	0.6535	1	F:nucleic acid binding	-
JM104677.1	---NA---	677	0			0	-
JM106762.1	---NA---	677	0			0	-
JM106493.1	---NA---	677	0			0	-
JM105810.1	---NA---	677	0			0	-
JM105609.1	---NA---	677	0			0	-
JM105391.1	---NA---	677	0			0	-
JM105291.1	retrotransposon-like family member (retr-1)-like	677	20	2.23e-48	0.678	0	-
JM105232.1	sil1 protein	677	20	4.81e-43	0.5865	0	-
JM106257.1	---NA---	676	0			0	-
JM106081.1	---NA---	676	0			0	-
JM105985.1	---NA---	676	0			0	-
JM105859.1	---NA---	676	0			0	-
JM105227.1	---NA---	676	0			0	-
JM105222.1	---NA---	676	0			0	-
JM105221.1	---NA---	676	0			0	-
JM104829.1	---NA---	675	0			0	-
JM104756.1	---NA---	675	0			0	-
JM106391.1	pol polyprotein	675	9	1.01e-24	0.5944	0	-
JM106048.1	---NA---	675	0			0	-
JM105760.1	histone h1	675	20	1.23e-30	0.905	4	C:nucleosome; F:DNA binding; P:nucleosome assembly; C:nucleus	-
JM105443.1	---NA---	675	0			0	-
JM105429.1	hypothetical protein TcasGA2_TC002110 [Tribolium castaneum]	675	5	4.64e-33	0.564	0	-
JM105293.1	---NA---	675	0			0	-
JM105114.1	---NA---	674	0			0	-
JM104824.1	---NA---	674	0			0	-
JM104647.1	---NA---	674	0			0	-
JM106549.1	---NA---	674	0			0	-
JM106352.1	endonuclease-reverse transcriptase	674	9	3.2e-23	0.54	4	F:RNA binding; P:RNA-dependent DNA replication; F:RNA-directed DNA polymerase activity; F:endonuclease activity
JM105915.1	---NA---	674	0			0	-
JM105229.1	---NA---	674	0			0	-
JM105111.1	---NA---	673	0			0	-
JM105034.1	---NA---	673	0			0	-
JM104860.1	pol protein	673	20	8.52e-28	0.63	4	F:RNA binding; P:RNA-dependent DNA replication; F:endonuclease activity; F:RNA-directed DNA polymerase activity
JM106528.1	transposase	673	17	3.09e-26	0.9276	4	P:transposition, DNA-mediated; F:transposase activity; P:DNA repair; F:DNA binding	-
JM106343.1	---NA---	673	0			0	-
JM106013.1	endonuclease-reverse transcriptase	673	20	2.61e-41	0.5265	3	F:RNA binding; P:RNA-dependent DNA replication; F:RNA-directed DNA polymerase activity
JM105813.1	---NA---	673	0			0	-
JM105730.1	---NA---	673	0			0	-
JM105728.1	endonuclease-reverse transcriptase	673	18	5.81e-41	0.4994	3	F:RNA binding; P:RNA-dependent DNA replication; F:RNA-directed DNA polymerase activity
JM105689.1	protein	673	14	2.24e-17	0.5407	3	F:RNA binding; P:RNA-dependent DNA replication; F:RNA-directed DNA polymerase activity
JM105335.1	---NA---	673	0			0	-
JM106792.1	histone h1	672	20	2.8e-27	0.9075	4	C:nucleosome; F:DNA binding; P:nucleosome assembly; C:nucleus	-
JM105121.1	---NA---	672	0			0	-
JM105042.1	---NA---	672	0			0	-
JM104851.1	reverse transcriptase-like partial	672	4	8.98e-34	0.545	0	-
JM106573.1	---NA---	672	0			0	-
JM105904.1	---NA---	672	0			0	-
JM105576.1	---NA---	672	0			0	-
JM105038.1	---NA---	671	0			0	-
JM106638.1	---NA---	671	0			0	-
JM106066.1	---NA---	671	0			0	-
JM105746.1	---NA---	671	0			0	-
JM105470.1	bel12_ag transposon polyprotein	671	20	6.32e-56	0.6225	1	F:binding	-
JM105411.1	---NA---	671	0			0	-
JM105349.1	---NA---	671	0			0	-
JM105197.1	---NA---	671	0			0	-
JM105083.1	---NA---	670	0			0	-
JM105037.1	endonuclease-reverse transcriptase	670	3	1.74e-11	0.56	0	-
JM105031.1	---NA---	670	0			0	-
JM106057.1	---NA---	670	0			0	-
JM106055.1	---NA---	670	0			0	-
JM105525.1	---NA---	670	0			0	-
JM105147.1	---NA---	669	0			0	-
JM104885.1	reverse transcriptase-like	669	8	3.38e-25	0.65	0	-
JM104759.1	histone h2a	669	20	1.01e-53	0.999	5	C:nucleosome; F:DNA binding; P:nucleosome assembly; C:lipid particle; C:nucleus	-
JM104660.1	aminoglycoside 6 -n-acetyltransferase	669	20	1.44e-92	0.569	2	F:N-acetyltransferase activity; P:metabolic process	-
JM106622.1	endonuclease-reverse transcriptase	669	4	2.13e-11	0.605	0	-
JM106511.1	bel12_ag transposon polyprotein	669	20	1.42e-31	0.5255	10	F:RNA binding; P:proteolysis; P:RNA-dependent DNA replication; F:aspartic-type endopeptidase activity; F:RNA-directed DNA polymerase activity; F:DNA binding; F:nucleic acid binding; F:zinc ion binding; P:DNA integration; F:peptidase activity
JM106454.1	bel12_ag transposon polyprotein	669	20	1.42e-31	0.5255	10	F:RNA binding; P:proteolysis; P:RNA-dependent DNA replication; F:aspartic-type endopeptidase activity; F:RNA-directed DNA polymerase activity; F:DNA binding; F:nucleic acid binding; F:zinc ion binding; P:DNA integration; F:peptidase activity
JM106130.1	uncharacterized protein conserved in bacteria	669	20	1.71e-69	0.889	0	-
JM105048.1	---NA---	668	0			0	-
JM104993.1	low-density lipoprotein	668	20	7.98e-19	0.679	9	P:cellular process; P:localization; P:regionalization; P:tissue development; F:binding; P:cellular component assembly; P:cell surface receptor linked signaling pathway; C:membrane; P:embryonic limb morphogenesis	-
JM104936.1	cytidine 5 -triphosphate synthase 2	668	20	1.97e-17	0.732	6	C:mitochondrion; F:CTP synthase activity; P:pyrimidine nucleotide biosynthetic process; F:nucleotide binding; C:apical plasma membrane; C:basolateral plasma membrane	EC:6.3.4.2
JM104904.1	cytidine 5 -triphosphate synthase 2	668	20	1.97e-17	0.732	6	C:mitochondrion; F:CTP synthase activity; P:pyrimidine nucleotide biosynthetic process; F:nucleotide binding; C:apical plasma membrane; C:basolateral plasma membrane	EC:6.3.4.2
JM104820.1	---NA---	668	0			0	-
JM104742.1	---NA---	668	0			0	-
JM104651.1	endonuclease-reverse transcriptase	668	20	4.2e-44	0.5855	3	F:RNA binding; P:RNA-dependent DNA replication; F:RNA-directed DNA polymerase activity
JM106711.1	---NA---	668	0			0	-
JM106594.1	rhs element vgr family protein	668	20	4.41e-110	0.8225	0	-
JM106568.1	zinc finger bed domain-containing protein 5-like	668	1	1.46e-12	0.72	0	-
JM105805.1	reverse transcriptase	668	20	3.33e-41	0.694	3	F:RNA binding; P:RNA-dependent DNA replication; F:RNA-directed DNA polymerase activity
JM105503.1	penicillin-binding protein	668	20	6.01e-75	0.677	5	F:penicillin binding; F:hydrolase activity, acting on carbon-nitrogen (but not peptide) bonds; P:peptidoglycan-based cell wall biogenesis; P:cell division; P:xylan catabolic process	-
JM105295.1	type i secretion system atpase	668	20	6.36e-109	0.936	7	P:auxin biosynthetic process; F:peptidase activity; F:peptide-transporting ATPase activity; P:transmembrane transport; F:ATP binding; C:integral to membrane; P:proteolysis	EC:3.6.3.43
JM105136.1	uncharacterized transposon-derived protein	667	9	2.1e-19	0.5344	0	-
JM104962.1	---NA---	667	0			0	-
JM104821.1	---NA---	667	0			0	-
JM106209.1	endonuclease-reverse transcriptase	667	10	2.83e-32	0.685	3	F:RNA binding; F:RNA-directed DNA polymerase activity; P:RNA-dependent DNA replication	EC:2.7.7.49
JM106002.1	---NA---	667	0			0	-
JM105902.1	---NA---	667	0			0	-
JM105772.1	endonuclease-reverse transcriptase	667	1	9.76e-17	0.69	0	-
JM105663.1	---NA---	667	0			0	-
JM105574.1	endonuclease-reverse transcriptase	667	1	3.35e-17	0.6	0	-
JM105086.1	---NA---	666	0			0	-
JM106631.1	nuclease harbi1-like	666	20	9.3e-68	0.6325	0	-
JM106318.1	---NA---	666	0			0	-
JM105951.1	---NA---	666	0			0	-
JM105864.1	---NA---	666	0			0	-
JM105755.1	---NA---	666	0			0	-
JM105396.1	---NA---	666	0			0	-
JM104848.1	---NA---	665	0			0	-
JM106083.1	PREDICTED: hypothetical protein LOC100575822 [Acyrthosiphon pisum]	665	20	1.53e-38	0.5505	0	-
JM105981.1	---NA---	665	0			0	-
JM105796.1	hypothetical protein WPa_0495 [Wolbachia endosymbiont of Culex quinquefasciatus Pel]	665	1	4.75e-40	0.67	0	-
JM105499.1	ribosomal protein l21	665	3	5.85e-14	0.9833	4	C:ribosome; F:structural constituent of ribosome; P:translation; F:rRNA binding	EC:3.6.5.3
JM105344.1	---NA---	665	0			0	-
JM104757.1	---NA---	664	0			0	-
JM104741.1	---NA---	664	0			0	-
JM106704.1	---NA---	664	0			0	-
JM106649.1	PREDICTED: hypothetical protein LOC100571634 [Acyrthosiphon pisum]	664	5	3.74e-30	0.644	0	-
JM106524.1	hypothetical protein DAPPUDRAFT_329664 [Daphnia pulex]	664	3	1.1e-12	0.6467	0	-
JM106516.1	---NA---	664	0			0	-
JM105776.1	---NA---	664	0			0	-
JM105722.1	pol protein	664	20	3.28e-49	0.6065	1	F:transferase activity	-
JM105341.1	---NA---	664	0			0	-
JM105307.1	---NA---	664	0			0	-
JM105009.1	transposase domain-containing protein	663	20	1.93e-41	0.603	0	-
JM104763.1	---NA---	663	0			0	-
JM106706.1	---NA---	663	0			0	-
JM106605.1	endonuclease-reverse transcriptase	663	20	7.62e-22	0.5385	5	F:RNA binding; P:RNA-dependent DNA replication; F:RNA-directed DNA polymerase activity; F:DNA binding; F:endonuclease activity
JM106502.1	nadh dehydrogenase subunit i	663	20	6.82e-63	0.897	8	P:photosynthesis, light reaction; P:oxidation reduction; F:iron ion binding; F:4 iron, 4 sulfur cluster binding; F:electron carrier activity; F:quinone binding; C:plasma membrane; F:NADH dehydrogenase (ubiquinone) activity	EC:1.6.5.3
JM106445.1	---NA---	663	0			0	-
JM106340.1	---NA---	663	0			0	-
JM106282.1	---NA---	663	0			0	-
JM106068.1	---NA---	663	0			0	-
JM105895.1	---NA---	663	0			0	-
JM105788.1	heme-binding protein a	663	20	1.95e-118	0.9465	2	F:transporter activity; P:transport	-
JM106694.1	histone h1	662	20	6.59e-26	0.8485	4	C:nucleosome; F:DNA binding; P:nucleosome assembly; C:nucleus	-
JM106665.1	---NA---	662	0			0	-
JM106444.1	---NA---	662	0			0	-
JM106428.1	---NA---	662	0			0	-
JM106159.1	---NA---	662	0			0	-
JM106079.1	---NA---	662	0			0	-
JM106028.1	enzymatic polyprotein endonuclease reverse	662	20	7.73e-51	0.657	1	F:nucleic acid binding	-
JM105724.1	---NA---	662	0			0	-
JM105032.1	reverse transcriptase-like protein	661	3	6.82e-23	0.5267	0	-
JM104996.1	---NA---	661	0			0	-
JM104947.1	protein	661	20	4e-23	0.5435	3	F:RNA binding; P:RNA-dependent DNA replication; F:RNA-directed DNA polymerase activity
JM104915.1	protein	661	20	4e-23	0.5435	3	F:RNA binding; P:RNA-dependent DNA replication; F:RNA-directed DNA polymerase activity
JM104867.1	---NA---	661	0			0	-
JM106429.1	---NA---	661	0			0	-
JM106039.1	dna mismatch repair protein	661	20	1.64e-101	0.7505	4	F:ATP binding; F:damaged DNA binding; P:mismatch repair; F:mismatched DNA binding	-
JM105749.1	---NA---	661	0			0	-
JM105566.1	---NA---	661	0			0	-
JM106383.1	fbn8	660	20	4.9e-13	0.6355	3	F:receptor binding; C:extracellular space; P:signal transduction
JM106138.1	endonuclease-reverse transcriptase	660	10	1.57e-19	0.499	3	F:RNA binding; P:RNA-dependent DNA replication; F:RNA-directed DNA polymerase activity
JM106074.1	---NA---	660	0			0	-
JM106003.1	reverse ribonuclease integrase	660	20	1.41e-60	0.6385	4	F:nucleic acid binding; P:macromolecule metabolic process; P:primary metabolic process; F:catalytic activity	-
JM105928.1	---NA---	660	0			0	-
JM105778.1	drug resistance transporter	660	14	6.53e-58	0.7943	3	P:transmembrane transport; F:N-acetyltransferase activity; P:metabolic process	-
JM105569.1	---NA---	660	0			0	-
JM105417.1	---NA---	660	0			0	-
JM105314.1	---NA---	660	0			0	-
JM105116.1	---NA---	659	0			0	-
JM104755.1	importin beta-3	659	1	1.04e-15	0.87	0	-
JM106246.1	---NA---	659	0			0	-
JM106061.1	---NA---	659	0			0	-
JM105969.1	---NA---	659	0			0	-
JM105842.1	---NA---	659	0			0	-
JM105797.1	reverse transcriptase	659	4	2.03e-11	0.51	3	F:RNA binding; P:RNA-dependent DNA replication; F:RNA-directed DNA polymerase activity
JM105781.1	---NA---	659	0			0	-
JM105729.1	---NA---	659	0			0	-
JM105603.1	---NA---	659	0			0	-
JM105593.1	---NA---	659	0			0	-
JM105552.1	general transcription factor ii-i repeat domain-containing protein 2a	659	20	1.45e-50	0.678	2	F:binding; C:intracellular	-
JM105319.1	---NA---	659	0			0	-
JM105152.1	---NA---	658	0			0	-
JM105023.1	endonuclease-reverse transcriptase	658	1	2.57e-14	0.72	0	-
JM104771.1	---NA---	658	0			0	-
JM106496.1	pol protein	658	20	2.15e-45	0.7055	2	F:nucleic acid binding; P:DNA metabolic process	-
JM106230.1	---NA---	658	0			0	-
JM106137.1	---NA---	658	0			0	-
JM105354.1	reverse transcriptase	658	20	1.49e-46	0.6185	1	F:transferase activity	-
JM105320.1	---NA---	658	0			0	-
JM106769.1	---NA---	657	0			0	-
JM105061.1	---NA---	657	0			0	-
JM104969.1	hypothetical protein TcasGA2_TC004345 [Tribolium castaneum]	657	2	3.71e-13	0.485	0	-
JM106749.1	---NA---	657	0			0	-
JM106531.1	endonuclease-reverse transcriptase	657	20	5.3e-44	0.537	4	F:RNA binding; P:RNA-dependent DNA replication; F:endonuclease activity; F:RNA-directed DNA polymerase activity
JM106311.1	---NA---	657	0			0	-
JM106072.1	---NA---	657	0			0	-
JM105921.1	---NA---	657	0			0	-
JM105769.1	---NA---	657	0			0	-
JM105563.1	---NA---	657	0			0	-
JM105521.1	---NA---	657	0			0	-
JM105216.1	---NA---	657	0			0	-
JM104786.1	---NA---	656	0			0	-
JM104710.1	PREDICTED: hypothetical protein, partial [Hydra magnipapillata]	656	5	7.88e-16	0.604	0	-
JM106499.1	enzymatic polyprotein endonuclease reverse	656	20	7.76e-72	0.7255	2	F:nucleic acid binding; P:DNA metabolic process	-
JM105608.1	---NA---	656	0			0	-
JM105393.1	reverse	656	20	2.12e-53	0.703	3	F:RNA binding; P:RNA-dependent DNA replication; F:RNA-directed DNA polymerase activity
JM104776.1	bel12_ag transposon polyprotein	655	20	3.53e-24	0.5555	9	F:nucleic acid binding; F:zinc ion binding; F:DNA binding; F:RNA-directed DNA polymerase activity; F:RNA binding; P:DNA integration; F:aspartic-type endopeptidase activity; P:RNA-dependent DNA replication; P:proteolysis
JM106266.1	---NA---	655	0			0	-
JM106236.1	zinc finger mym-type protein 1	655	20	1.3e-18	0.7415	0	-
JM106180.1	---NA---	655	0			0	-
JM106124.1	---NA---	655	0			0	-
JM106001.1	---NA---	655	0			0	-
JM105953.1	histone h2a	655	20	9.53e-54	0.999	5	C:nucleosome; F:DNA binding; P:nucleosome assembly; C:lipid particle; C:nucleus	-
JM105905.1	---NA---	655	0			0	-
JM105838.1	---NA---	655	0			0	-
JM105672.1	---NA---	655	0			0	-
JM105581.1	---NA---	655	0			0	-
JM105515.1	---NA---	655	0			0	-
JM105437.1	reverse	655	20	2.77e-53	0.7035	3	F:RNA binding; P:RNA-dependent DNA replication; F:RNA-directed DNA polymerase activity
JM104788.1	---NA---	654	0			0	-
JM106737.1	---NA---	654	0			0	-
JM106657.1	endonuclease-reverse transcriptase	654	3	4.18e-17	0.6167	0	-
JM105885.1	---NA---	654	0			0	-
JM105800.1	---NA---	654	0			0	-
JM105739.1	---NA---	654	0			0	-
JM105487.1	chloramphenicol acetyltransferase	654	20	1.09e-41	0.982	2	F:chloramphenicol O-acetyltransferase activity; P:response to antibiotic	EC:2.3.1.28
JM105405.1	hypothetical protein TcasGA2_TC011570 [Tribolium castaneum]	654	1	7.32e-13	0.74	0	-
JM105285.1	phage uncharacterized protein	654	20	2.48e-94	0.8925	1	P:biological_process
JM106791.1	---NA---	653	0			0	-
JM106781.1	---NA---	653	0			0	-
JM104806.1	beta-galactosidase alpha-peptide	653	20	7.1e-49	0.9265	0	-
JM104649.1	---NA---	653	0			0	-
JM106431.1	PREDICTED: hypothetical protein LOC100571634 [Acyrthosiphon pisum]	653	2	4.06e-20	0.52	0	-
JM106345.1	---NA---	653	0			0	-
JM106289.1	---NA---	653	0			0	-
JM106173.1	---NA---	653	0			0	-
JM105638.1	---NA---	653	0			0	-
JM105627.1	---NA---	653	0			0	-
JM105568.1	endonuclease-reverse transcriptase	653	2	9.66e-22	0.535	0	-
JM105428.1	pol-like protein	653	3	2.16e-13	0.5167	5	F:RNA binding; F:nucleic acid binding; P:RNA-dependent DNA replication; F:ribonuclease H activity; F:RNA-directed DNA polymerase activity
JM105410.1	---NA---	653	0			0	-
JM105329.1	---NA---	653	0			0	-
JM104998.1	---NA---	652	0			0	-
JM104822.1	---NA---	652	0			0	-
JM106747.1	---NA---	652	0			0	-
JM106666.1	---NA---	652	0			0	-
JM105897.1	dynamin	652	20	7.66e-19	0.902	2	F:GTPase activity; F:GTP binding	EC:3.6.5.1; EC:3.6.5.2; EC:3.6.5.3; EC:3.6.5.4
JM105820.1	rna-directed dna polymerase (reverse transcriptase)	652	7	1.14e-30	0.6714	1	F:catalytic activity	-
JM105661.1	conserved hypothetical protein domain protein [Wolbachia endosymbiont of Drosophila simulans]	652	20	4e-68	0.822	0	-
JM105386.1	---NA---	652	0			0	-
JM105226.1	---NA---	652	0			0	-
JM104665.1	---NA---	651	0			0	-
JM104663.1	---NA---	651	0			0	-
JM106465.1	---NA---	651	0			0	-
JM106446.1	---NA---	651	0			0	-
JM106149.1	---NA---	651	0			0	-
JM105866.1	retrovirus-related pol polyprotein from transposon 412	651	2	9.68e-14	0.58	0	-
JM105850.1	endonuclease-reverse transcriptase	651	20	2e-43	0.5965	3	F:RNA binding; P:RNA-dependent DNA replication; F:RNA-directed DNA polymerase activity
JM105784.1	---NA---	651	0			0	-
JM105750.1	---NA---	651	0			0	-
JM105732.1	---NA---	651	0			0	-
JM105717.1	---NA---	651	0			0	-
JM104843.1	---NA---	650	0			0	-
JM106545.1	dna polymerase zeta catalytic subunit	650	7	5.38e-41	0.5743	0	-
JM106313.1	---NA---	650	0			0	-
JM106018.1	---NA---	650	0			0	-
JM105854.1	transposon-derived buster3 transposase-like protein	650	11	2.63e-49	0.5764	0	-
JM105126.1	endonuclease-reverse transcriptase	649	17	2.12e-29	0.6	3	F:RNA binding; P:RNA-dependent DNA replication; F:RNA-directed DNA polymerase activity
JM106650.1	---NA---	649	0			0	-
JM106515.1	nuclease harbi1-like	649	20	4e-28	0.6705	0	-
JM106335.1	---NA---	649	0			0	-
JM105677.1	---NA---	649	0			0	-
JM105555.1	---NA---	649	0			0	-
JM104837.1	---NA---	648	0			0	-
JM104778.1	---NA---	648	0			0	-
JM104664.1	---NA---	648	0			0	-
JM106761.1	jerky protein homolog-like	648	6	2.06e-16	0.5583	0	-
JM106717.1	reverse	648	20	7.83e-16	0.5795	6	F:RNA binding; F:nucleic acid binding; P:RNA-dependent DNA replication; F:ribonuclease H activity; F:RNA-directed DNA polymerase activity; F:zinc ion binding
JM106583.1	lian-aa1 retrotransposon protein	648	1	2.61e-11	0.46	0	-
JM106421.1	---NA---	648	0			0	-
JM106347.1	---NA---	648	0			0	-
JM106047.1	endonuclease-reverse transcriptase	648	20	3.19e-22	0.615	4	F:RNA binding; P:RNA-dependent DNA replication; F:RNA-directed DNA polymerase activity; F:endonuclease activity
JM105803.1	---NA---	648	0			0	-
JM105646.1	---NA---	648	0			0	-
JM105572.1	---NA---	648	0			0	-
JM106797.1	beta-galactosidase alpha-peptide	647	20	6.93e-49	0.919	0	-
JM105051.1	histone h2b	647	20	1.27e-18	0.968	5	C:nucleosome; F:DNA binding; P:nucleosome assembly; C:lipid particle; C:NuA4 histone acetyltransferase complex	-
JM106728.1	---NA---	647	0			0	-
JM106226.1	histone 3	647	20	1.66e-26	0.9975	4	C:nucleosome; F:DNA binding; P:nucleosome assembly; C:nucleus	-
JM105891.1	spermatogenesis associated 5	647	19	1.01e-41	0.5668	0	-
JM105418.1	---NA---	647	0			0	-
JM105363.1	---NA---	647	0			0	-
JM105171.1	---NA---	646	0			0	-
JM105133.1	---NA---	646	0			0	-
JM104696.1	---NA---	646	0			0	-
JM104668.1	endonuclease-reverse transcriptase	646	8	1.32e-23	0.5338	0	-
JM106557.1	---NA---	646	0			0	-
JM106472.1	gtp cyclohydrolase ii	646	20	2.11e-114	0.824	2	P:riboflavin biosynthetic process; F:GTP cyclohydrolase II activity	EC:3.5.4.25
JM106164.1	---NA---	646	0			0	-
JM106059.1	rte-1 element	646	2	3.35e-19	0.705	0	-
JM105976.1	PREDICTED: similar to BMKETTIN [Tribolium castaneum]	646	2	3.46e-32	0.615	0	-
JM105925.1	protein	646	20	2.93e-23	0.6975	4	F:RNA binding; P:RNA-dependent DNA replication; F:endonuclease activity; F:RNA-directed DNA polymerase activity
JM105812.1	---NA---	646	0			0	-
JM105710.1	---NA---	646	0			0	-
JM105631.1	zinc mym domain containing 1	646	20	3.41e-36	0.569	0	-
JM105595.1	uncharacterized protein	646	18	1.2e-109	0.8361	0	-
JM105506.1	---NA---	646	0			0	-
JM105040.1	---NA---	645	0			0	-
JM104950.1	histidine kinase- dna gyrase b- and hsp90-like domain containing protein	645	10	1.97e-19	0.509	1	F:catalytic activity	-
JM104918.1	histidine kinase- dna gyrase b- and hsp90-like domain containing protein	645	10	1.97e-19	0.509	1	F:catalytic activity	-
JM104874.1	chloramphenicol acetyltransferase	645	20	4.07e-41	1	2	F:chloramphenicol O-acetyltransferase activity; P:response to antibiotic	EC:2.3.1.28
JM106754.1	---NA---	645	0			0	-
JM106278.1	---NA---	645	0			0	-
JM105561.1	---NA---	645	0			0	-
JM105304.1	---NA---	645	0			0	-
JM106794.1	plasmid partition protein	644	20	1.27e-111	0.9825	12	F:endopeptidase activity; F:oxygen-dependent protoporphyrinogen oxidase activity; P:tetracycline transport; F:DNA binding; P:plasmid partitioning; C:cell outer membrane; P:transmembrane transport; P:oxidation reduction; C:integral to membrane; P:proteolysis; P:response to antibiotic; F:tetracycline:hydrogen antiporter activity	EC:1.3.3.4
JM105124.1	transposase yabusame-1	644	20	2.1e-70	0.681	0	-
JM104924.1	---NA---	644	0			0	-
JM104865.1	---NA---	644	0			0	-
JM104732.1	---NA---	644	0			0	-
JM106675.1	endonuclease-reverse transcriptase	644	20	5.63e-35	0.569	4	F:RNA binding; P:RNA-dependent DNA replication; F:endonuclease activity; F:RNA-directed DNA polymerase activity
JM106617.1	pao retrotransposon peptidase family	644	6	1.35e-12	0.4933	4	F:nucleic acid binding; F:zinc ion binding; P:DNA integration; F:DNA binding
JM105916.1	---NA---	644	0			0	-
JM105884.1	---NA---	644	0			0	-
JM105771.1	---NA---	644	0			0	-
JM105196.1	---NA---	644	0			0	-
JM105088.1	---NA---	643	0			0	-
JM105008.1	---NA---	643	0			0	-
JM104740.1	---NA---	643	0			0	-
JM106161.1	---NA---	643	0			0	-
JM106065.1	---NA---	643	0			0	-
JM105642.1	---NA---	643	0			0	-
JM105220.1	---NA---	643	0			0	-
JM104943.1	---NA---	642	0			0	-
JM104911.1	---NA---	642	0			0	-
JM104707.1	pol-like protein	642	10	2.54e-19	0.534	5	F:RNA binding; F:nucleic acid binding; P:RNA-dependent DNA replication; F:ribonuclease H activity; F:RNA-directed DNA polymerase activity
JM106219.1	---NA---	642	0			0	-
JM106123.1	---NA---	642	0			0	-
JM106560.1	endonuclease-reverse transcriptase	641	20	1.68e-23	0.5325	4	F:RNA binding; P:RNA-dependent DNA replication; F:RNA-directed DNA polymerase activity; F:DNA binding
JM106498.1	reverse transcriptase	641	4	1.92e-11	0.51	3	F:RNA binding; P:RNA-dependent DNA replication; F:RNA-directed DNA polymerase activity
JM106386.1	---NA---	641	0			0	-
JM105955.1	enzymatic polyprotein endonuclease reverse	641	20	1.89e-75	0.759	2	F:nucleic acid binding; P:DNA metabolic process	-
JM105845.1	---NA---	641	0			0	-
JM105318.1	---NA---	641	0			0	-
JM104955.1	---NA---	640	0			0	-
JM104923.1	---NA---	640	0			0	-
JM104814.1	PREDICTED: hypothetical protein LOC100570593 [Acyrthosiphon pisum]	640	1	8.91e-17	0.44	0	-
JM104714.1	---NA---	640	0			0	-
JM106553.1	short-chain dehydrogenase reductase sdr	640	18	1.9e-51	0.93	3	F:oxidoreductase activity; P:oxidation reduction; F:binding	-
JM106227.1	pol-like protein	640	13	2.96e-20	0.5092	5	F:RNA binding; F:nucleic acid binding; P:RNA-dependent DNA replication; F:ribonuclease H activity; F:RNA-directed DNA polymerase activity
JM105903.1	---NA---	640	0			0	-
JM105607.1	---NA---	640	0			0	-
JM105520.1	zinc finger protein	640	20	1.31e-60	0.716	0	-
JM105377.1	---NA---	640	0			0	-
JM105233.1	nuclease harbi1-like	640	20	5.92e-45	0.637	2	F:molecular_function; P:biological_process
JM104966.1	pol-like protein	639	10	6.79e-33	0.684	2	F:nucleic acid binding; F:zinc ion binding
JM106765.1	endonuclease-reverse transcriptase	639	9	1.16e-32	0.63	1	F:catalytic activity	-
JM106412.1	PREDICTED: similar to GF16599 [Hydra magnipapillata]	639	1	9.85e-16	0.6	0	-
JM106084.1	---NA---	639	0			0	-
JM105883.1	---NA---	639	0			0	-
JM105855.1	sil1 protein	639	15	8.26e-47	0.6147	0	-
JM105791.1	---NA---	639	0			0	-
JM105455.1	receptor-type tyrosine-protein phosphatase kappa	639	15	2.18e-39	0.768	0	-
JM105392.1	---NA---	639	0			0	-
JM105127.1	---NA---	638	0			0	-
JM105125.1	---NA---	638	0			0	-
JM106743.1	---NA---	638	0			0	-
JM106142.1	transposon ty3-i gag-pol poly	638	13	9.34e-43	0.5254	2	F:nucleic acid binding; F:zinc ion binding
JM106132.1	---NA---	638	0			0	-
JM105938.1	---NA---	638	0			0	-
JM105818.1	---NA---	638	0			0	-
JM105815.1	---NA---	638	0			0	-
JM105708.1	---NA---	638	0			0	-
JM105361.1	protein	638	18	2.83e-15	0.7994	1	C:mitochondrion
JM104751.1	---NA---	637	0			0	-
JM106720.1	---NA---	637	0			0	-
JM106035.1	---NA---	637	0			0	-
JM105952.1	---NA---	637	0			0	-
JM106768.1	---NA---	636	0			0	-
JM105966.1	conserved hypothetical protein [Ixodes scapularis]	636	2	5.34e-14	0.61	0	-
JM105848.1	homeobox protein ceh-19	636	7	7.94e-26	0.74	0	-
JM105764.1	alternative oxidase	636	20	2.54e-40	0.546	0	-
JM105204.1	---NA---	636	0			0	-
JM104954.1	reverse transcriptase-like	635	17	3.77e-20	0.6206	3	F:RNA binding; P:RNA-dependent DNA replication; F:RNA-directed DNA polymerase activity
JM104939.1	---NA---	635	0			0	-
JM104922.1	reverse transcriptase-like	635	17	3.77e-20	0.6206	3	F:RNA binding; P:RNA-dependent DNA replication; F:RNA-directed DNA polymerase activity
JM104907.1	---NA---	635	0			0	-
JM104738.1	---NA---	635	0			0	-
JM104735.1	---NA---	635	0			0	-
JM104702.1	---NA---	635	0			0	-
JM106601.1	---NA---	635	0			0	-
JM106394.1	---NA---	635	0			0	-
JM106211.1	---NA---	635	0			0	-
JM106208.1	---NA---	635	0			0	-
JM105872.1	---NA---	635	0			0	-
JM106401.1	nuclease harbi1-like	634	20	8.22e-23	0.6665	0	-
JM106103.1	---NA---	634	0			0	-
JM105918.1	---NA---	634	0			0	-
JM105636.1	---NA---	634	0			0	-
JM105483.1	atp synthase b subunit	634	12	3.06e-46	0.9433	5	F:hydrogen ion transmembrane transporter activity; C:integral to membrane; P:ATP synthesis coupled proton transport; C:proton-transporting ATP synthase complex, coupling factor F(o); F:hydrolase activity	-
JM105253.1	---NA---	634	0			0	-
JM105010.1	---NA---	633	0			0	-
JM104748.1	---NA---	633	0			0	-
JM106763.1	---NA---	633	0			0	-
JM106722.1	---NA---	633	0			0	-
JM106593.1	family transcriptional regulator	633	20	1.14e-101	0.8315	2	F:transcription factor activity; P:regulation of transcription, DNA-dependent	-
JM106566.1	protein	633	13	2.37e-14	0.4638	5	F:RNA binding; F:nucleic acid binding; P:RNA-dependent DNA replication; F:ribonuclease H activity; F:RNA-directed DNA polymerase activity
JM106374.1	endonuclease-reverse transcriptase	633	20	4.29e-32	0.5575	3	F:RNA binding; P:RNA-dependent DNA replication; F:RNA-directed DNA polymerase activity
JM106258.1	---NA---	633	0			0	-
JM105407.1	endonuclease-reverse transcriptase	633	1	2e-17	0.64	0	-
JM105259.1	---NA---	633	0			0	-
JM105157.1	endonuclease-reverse transcriptase	632	1	2.06e-15	0.75	0	-
JM105062.1	---NA---	632	0			0	-
JM104817.1	zinc finger mym-type protein 1	632	5	2.76e-15	0.548	0	-
JM106171.1	---NA---	632	0			0	-
JM106152.1	---NA---	632	0			0	-
JM106042.1	---NA---	632	0			0	-
JM105914.1	---NA---	632	0			0	-
JM105612.1	---NA---	632	0			0	-
JM105389.1	---NA---	632	0			0	-
JM105373.1	dna-mediated transposase	632	1	2.84e-14	0.52	4	F:transposase activity; P:DNA integration; P:transposition, DNA-mediated; F:DNA binding
JM105348.1	---NA---	632	0			0	-
JM105094.1	---NA---	631	0			0	-
JM105047.1	---NA---	631	0			0	-
JM106635.1	---NA---	631	0			0	-
JM106364.1	hypothetical protein TcasGA2_TC001846 [Tribolium castaneum]	631	1	5.33e-12	0.74	0	-
JM105999.1	---NA---	631	0			0	-
JM105978.1	craniofacial development protein 2-like	631	20	8.52e-41	0.624	0	-
JM105721.1	tigger transposable element-derived protein 1	631	14	8.19e-22	0.55	2	F:nucleic acid binding; F:DNA binding
JM105365.1	---NA---	631	0			0	-
JM105231.1	endonuclease-reverse transcriptase	631	20	4.97e-57	0.5625	3	F:RNA binding; P:RNA-dependent DNA replication; F:RNA-directed DNA polymerase activity
JM105179.1	---NA---	631	0			0	-
JM104785.1	---NA---	630	0			0	-
JM105932.1	---NA---	630	0			0	-
JM105922.1	pol-like protein	630	3	1.12e-16	0.5667	5	F:RNA binding; F:nucleic acid binding; P:RNA-dependent DNA replication; F:ribonuclease H activity; F:RNA-directed DNA polymerase activity
JM105808.1	---NA---	630	0			0	-
JM106771.1	---NA---	629	0			0	-
JM104831.1	---NA---	629	0			0	-
JM104672.1	---NA---	629	0			0	-
JM106053.1	PREDICTED: hypothetical protein LOC100570299 [Acyrthosiphon pisum]	629	1	2.39e-11	0.53	0	-
JM105643.1	---NA---	629	0			0	-
JM105512.1	---NA---	629	0			0	-
JM105095.1	---NA---	628	0			0	-
JM104760.1	histone h2b	628	20	1.71e-17	0.981	5	C:nucleosome; F:DNA binding; P:nucleosome assembly; C:lipid particle; C:NuA4 histone acetyltransferase complex	-
JM106548.1	---NA---	628	0			0	-
JM106337.1	scan domain-containing protein 3	628	3	1.44e-16	0.68	0	-
JM105715.1	---NA---	628	0			0	-
JM105526.1	---NA---	628	0			0	-
JM105403.1	integrase catalytic region	628	20	3.52e-47	0.6475	1	F:binding	-
JM105333.1	---NA---	628	0			0	-
JM105236.1	endonuclease-reverse transcriptase	628	5	1.42e-21	0.544	0	-
JM105153.1	---NA---	627	0			0	-
JM104830.1	endonuclease-reverse transcriptase	627	20	4.6e-47	0.575	5	F:RNA binding; F:nucleic acid binding; P:RNA-dependent DNA replication; F:ribonuclease H activity; F:RNA-directed DNA polymerase activity
JM104761.1	---NA---	627	0			0	-
JM104747.1	---NA---	627	0			0	-
JM106049.1	transposase tn5	627	8	3.29e-40	0.845	3	P:transposition, DNA-mediated; F:transposase activity; F:DNA binding	-
JM105871.1	---NA---	627	0			0	-
JM105819.1	---NA---	627	0			0	-
JM105545.1	endonuclease-reverse transcriptase	627	20	7.35e-20	0.572	5	F:RNA binding; P:RNA-dependent DNA replication; F:RNA-directed DNA polymerase activity; F:DNA binding; F:endonuclease activity
JM105409.1	---NA---	627	0			0	-
JM105202.1	---NA---	627	0			0	-
JM106788.1	---NA---	626	0			0	-
JM105056.1	---NA---	626	0			0	-
JM104928.1	---NA---	626	0			0	-
JM104896.1	---NA---	626	0			0	-
JM104656.1	hypothetical protein EAI_05092 [Harpegnathos saltator]	626	1	2.42e-11	0.61	0	-
JM106721.1	---NA---	626	0			0	-
JM106624.1	uncharacterized transposon-derived protein	626	8	1.63e-20	0.5963	0	-
JM106602.1	---NA---	626	0			0	-
JM105317.1	rna-directed dna polymerase from mobile element jockey-like	626	3	8.93e-19	0.48	0	-
JM105209.1	---NA---	626	0			0	-
JM106782.1	---NA---	625	0			0	-
JM104971.1	pol polyprotein	625	9	5.42e-16	0.6422	0	-
JM104935.1	pol protein	625	20	5.02e-46	0.633	4	F:RNA binding; P:RNA-dependent DNA replication; F:RNA-directed DNA polymerase activity; F:endonuclease activity
JM104903.1	pol protein	625	20	5.02e-46	0.633	4	F:RNA binding; P:RNA-dependent DNA replication; F:RNA-directed DNA polymerase activity; F:endonuclease activity
JM104737.1	---NA---	625	0			0	-
JM104676.1	---NA---	625	0			0	-
JM104653.1	---NA---	625	0			0	-
JM106450.1	---NA---	625	0			0	-
JM106192.1	---NA---	625	0			0	-
JM105948.1	rna-directed dna polymerase (reverse transcriptase)	625	2	3.63e-12	0.555	0	-
JM105853.1	---NA---	625	0			0	-
JM105714.1	tigger transposable element derived 6-like	625	13	9.19e-32	0.5085	6	F:nucleic acid binding; P:regulation of transcription; C:chromosome, centromeric region; F:DNA binding; P:central nervous system development; C:nucleus
JM105424.1	---NA---	625	0			0	-
JM105371.1	---NA---	625	0			0	-
JM105294.1	---NA---	625	0			0	-
JM105252.1	endonuclease-reverse transcriptase	625	20	2.06e-15	0.4985	4	F:RNA binding; P:RNA-dependent DNA replication; F:RNA-directed DNA polymerase activity; F:endonuclease activity
JM106752.1	---NA---	624	0			0	-
JM105787.1	hypothetical protein TcasGA2_TC006945 [Tribolium castaneum]	624	1	5.99e-15	0.6	0	-
JM105619.1	---NA---	624	0			0	-
JM105041.1	---NA---	623	0			0	-
JM104812.1	---NA---	623	0			0	-
JM106618.1	---NA---	623	0			0	-
JM106315.1	---NA---	623	0			0	-
JM106288.1	FhaB protein [Acinetobacter baumannii ATCC 19606]	623	1	1.99e-87	0.96	2	F:endonuclease activity; F:nucleic acid binding	-
JM106254.1	endonuclease-reverse transcriptase	623	12	7e-21	0.5475	0	-
JM105697.1	peroxisomal membrane protein 11b	623	20	4.81e-33	0.6785	2	P:peroxisome fission; C:peroxisomal membrane
JM105404.1	---NA---	623	0			0	-
JM105359.1	---NA---	623	0			0	-
JM105237.1	---NA---	623	0			0	-
JM105044.1	endonuclease-reverse transcriptase	622	20	4.45e-41	0.6745	3	F:RNA binding; P:RNA-dependent DNA replication; F:RNA-directed DNA polymerase activity
JM105043.1	pol-like protein	622	12	7.21e-21	0.4758	5	F:RNA binding; F:nucleic acid binding; P:RNA-dependent DNA replication; F:ribonuclease H activity; F:RNA-directed DNA polymerase activity
JM105994.1	---NA---	622	0			0	-
JM105887.1	---NA---	622	0			0	-
JM105860.1	---NA---	622	0			0	-
JM105720.1	integrase core domain protein	622	20	3.53e-60	0.6535	8	F:RNA binding; F:nucleic acid binding; P:proteolysis; P:DNA integration; P:RNA-dependent DNA replication; F:aspartic-type endopeptidase activity; F:RNA-directed DNA polymerase activity; F:DNA binding
JM105544.1	reverse transcriptase	622	3	9.58e-15	0.5867	7	F:RNA binding; F:nucleic acid binding; P:DNA integration; P:RNA-dependent DNA replication; F:zinc ion binding; F:RNA-directed DNA polymerase activity; F:DNA binding
JM105507.1	---NA---	622	0			0	-
JM106307.1	pol polyprotein	621	20	7.72e-15	0.5205	8	F:RNA binding; F:nucleic acid binding; P:DNA integration; P:RNA-dependent DNA replication; F:RNA-directed DNA polymerase activity; F:DNA binding; P:proteolysis; F:aspartic-type endopeptidase activity
JM106109.1	---NA---	621	0			0	-
JM106082.1	---NA---	621	0			0	-
JM105857.1	---NA---	621	0			0	-
JM105802.1	---NA---	621	0			0	-
JM105381.1	---NA---	621	0			0	-
JM104884.1	---NA---	620	0			0	-
JM106755.1	---NA---	620	0			0	-
JM106642.1	zinc mym domain containing 1	620	20	3.21e-70	0.733	0	-
JM106348.1	---NA---	620	0			0	-
JM106043.1	---NA---	620	0			0	-
JM106021.1	---NA---	620	0			0	-
JM105662.1	---NA---	620	0			0	-
JM105274.1	bel12_ag transposon polyprotein	620	20	5.61e-34	0.5955	1	F:binding	-
JM105207.1	---NA---	620	0			0	-
JM105080.1	---NA---	619	0			0	-
JM105063.1	reverse transcriptase-like	619	16	5.42e-37	0.5813	3	F:RNA binding; P:RNA-dependent DNA replication; F:RNA-directed DNA polymerase activity
JM104868.1	---NA---	619	0			0	-
JM104695.1	scan domain-containing protein 3-like	619	20	1.63e-33	0.6275	3	F:molecular_function; P:biological_process; F:protein dimerization activity
JM106639.1	---NA---	619	0			0	-
JM106517.1	---NA---	619	0			0	-
JM105843.1	---NA---	619	0			0	-
JM105423.1	---NA---	619	0			0	-
JM106784.1	---NA---	618	0			0	-
JM104932.1	uncharacterized protein kiaa1586-like	618	14	7.86e-20	0.5357	0	-
JM104900.1	uncharacterized protein kiaa1586-like	618	14	7.86e-20	0.5357	0	-
JM104813.1	---NA---	618	0			0	-
JM104720.1	---NA---	618	0			0	-
JM106150.1	reverse transcriptase	618	20	4.76e-25	0.5475	1	F:hydrolase activity	-
JM106146.1	gt334 protein	618	4	5.09e-19	0.59	0	-
JM105733.1	endonuclease reverse transcriptase	618	20	6.62e-35	0.5165	6	F:RNA binding; F:nucleic acid binding; P:RNA-dependent DNA replication; F:ribonuclease H activity; F:RNA-directed DNA polymerase activity; F:endonuclease activity
JM105628.1	dna-mediated transposase	618	3	1.8e-17	0.5233	4	F:transposase activity; P:DNA integration; P:transposition, DNA-mediated; F:DNA binding
JM105584.1	PREDICTED: hypothetical protein LOC100570593 [Acyrthosiphon pisum]	618	20	2.01e-19	0.5615	0	-
JM105419.1	---NA---	618	0			0	-
JM105394.1	---NA---	618	0			0	-
JM105357.1	thiamine pyrophosphokinase	618	10	6.73e-96	0.769	5	F:kinase activity; F:thiamin diphosphokinase activity; F:ATP binding; P:thiamin diphosphate biosynthetic process; P:thiamin metabolic process	EC:2.7.6.2
JM105312.1	---NA---	618	0			0	-
JM106510.1	---NA---	617	0			0	-
JM106508.1	---NA---	617	0			0	-
JM106336.1	cg9090 cg9090-pa	617	12	1.97e-23	0.6575	1	P:cellular process	-
JM106144.1	---NA---	617	0			0	-
JM106015.1	endonuclease reverse transcriptase	617	20	2.49e-18	0.5025	5	F:RNA binding; F:nucleic acid binding; P:RNA-dependent DNA replication; F:ribonuclease H activity; F:RNA-directed DNA polymerase activity
JM105979.1	---NA---	617	0			0	-
JM105934.1	m16 family	617	20	3.88e-104	0.7945	3	F:metalloendopeptidase activity; P:proteolysis; F:zinc ion binding	EC:3.4.24.0
JM105559.1	---NA---	617	0			0	-
JM105130.1	---NA---	616	0			0	-
JM104988.1	retrotransposon-like family member (retr-1)-like	616	20	4.07e-53	0.674	3	F:RNA binding; P:RNA-dependent DNA replication; F:RNA-directed DNA polymerase activity
JM104807.1	---NA---	616	0			0	-
JM104787.1	---NA---	616	0			0	-
JM106714.1	---NA---	616	0			0	-
JM106388.1	PREDICTED: hypothetical protein LOC100572977 [Acyrthosiphon pisum]	616	1	2.42e-11	0.54	0	-
JM106090.1	hypothetical protein BRAFLDRAFT_57334 [Branchiostoma floridae]	616	20	9.96e-76	0.7365	1	F:binding	-
JM106036.1	---NA---	616	0			0	-
JM105324.1	---NA---	616	0			0	-
JM104753.1	---NA---	615	0			0	-
JM106238.1	---NA---	615	0			0	-
JM106120.1	histone h1	615	20	7.49e-23	0.852	4	C:nucleosome; F:DNA binding; P:nucleosome assembly; C:nucleus	-
JM105982.1	---NA---	615	0			0	-
JM105858.1	---NA---	615	0			0	-
JM105768.1	---NA---	615	0			0	-
JM105602.1	---NA---	615	0			0	-
JM106592.1	---NA---	614	0			0	-
JM105748.1	---NA---	614	0			0	-
JM106606.1	---NA---	613	0			0	-
JM106005.1	---NA---	613	0			0	-
JM105970.1	---NA---	613	0			0	-
JM105585.1	---NA---	613	0			0	-
JM106440.1	---NA---	612	0			0	-
JM106414.1	chloramphenicol acetyltransferase	612	20	3.59e-41	1	2	F:chloramphenicol O-acetyltransferase activity; P:response to antibiotic	EC:2.3.1.28
JM106037.1	---NA---	612	0			0	-
JM105929.1	integrase core domain protein	612	20	7.49e-39	0.591	0	-
JM105847.1	---NA---	612	0			0	-
JM105378.1	pol protein	612	18	5.57e-26	0.5517	8	F:nucleic acid binding; P:DNA integration; F:DNA binding; F:RNA binding; P:proteolysis; P:RNA-dependent DNA replication; F:aspartic-type endopeptidase activity; F:RNA-directed DNA polymerase activity
JM105201.1	---NA---	612	0			0	-
JM105068.1	---NA---	611	0			0	-
JM104941.1	---NA---	611	0			0	-
JM104909.1	---NA---	611	0			0	-
JM106441.1	---NA---	611	0			0	-
JM106217.1	---NA---	611	0			0	-
JM106020.1	---NA---	611	0			0	-
JM105481.1	---NA---	611	0			0	-
JM105367.1	---NA---	611	0			0	-
JM105100.1	---NA---	610	0			0	-
JM105036.1	---NA---	610	0			0	-
JM104768.1	nuclease harbi1-like	610	20	1.99e-60	0.6175	0	-
JM104750.1	endonuclease reverse transcriptase	610	20	8.77e-24	0.528	0	-
JM106710.1	---NA---	610	0			0	-
JM106126.1	endonuclease-reverse transcriptase	610	2	4.91e-17	0.62	0	-
JM105511.1	---NA---	610	0			0	-
JM105416.1	---NA---	610	0			0	-
JM105382.1	---NA---	610	0			0	-
JM105064.1	---NA---	609	0			0	-
JM106669.1	rte-1 element	609	4	2.74e-18	0.53	0	-
JM106658.1	---NA---	609	0			0	-
JM106356.1	endonuclease and reverse transcriptase-like protein	609	20	2.31e-24	0.5275	6	F:ubiquitin thiolesterase activity; P:ubiquitin-dependent protein catabolic process; F:RNA binding; P:RNA-dependent DNA replication; F:RNA-directed DNA polymerase activity; F:endonuclease activity
JM106305.1	---NA---	609	0			0	-
JM106063.1	histone h3	609	20	8.22e-14	0.9845	4	C:nucleosome; F:DNA binding; P:nucleosome assembly; C:nucleus	-
JM104881.1	endonuclease-reverse transcriptase	608	20	1.15e-19	0.5315	0	-
JM104652.1	pol-like protein	608	10	4.15e-18	0.499	6	F:RNA binding; F:nucleic acid binding; P:RNA-dependent DNA replication; F:ribonuclease H activity; F:RNA-directed DNA polymerase activity; F:zinc ion binding
JM106595.1	endonuclease-reverse transcriptase	608	4	2.35e-21	0.6	0	-
JM106571.1	---NA---	608	0			0	-
JM106396.1	---NA---	608	0			0	-
JM106322.1	---NA---	608	0			0	-
JM105751.1	---NA---	608	0			0	-
JM105020.1	---NA---	607	0			0	-
JM106662.1	---NA---	607	0			0	-
JM106240.1	ensangp00000010363	607	15	1.34e-16	0.5987	0	-
JM106178.1	6 plasmid conjugal transfer family protein	607	7	2.8e-107	0.8471	1	P:conjugation with cellular fusion	-
JM105947.1	---NA---	607	0			0	-
JM105688.1	---NA---	607	0			0	-
JM105673.1	---NA---	607	0			0	-
JM105577.1	---NA---	607	0			0	-
JM105276.1	---NA---	607	0			0	-
JM105214.1	---NA---	607	0			0	-
JM104838.1	---NA---	606	0			0	-
JM106732.1	---NA---	606	0			0	-
JM106504.1	---NA---	606	0			0	-
JM106160.1	---NA---	606	0			0	-
JM106093.1	---NA---	606	0			0	-
JM105846.1	pol polyprotein	606	6	5.99e-25	0.5183	0	-
JM105826.1	nadh dehydrogenase subunit g	606	20	3.09e-114	0.9145	6	F:metal ion binding; F:electron carrier activity; F:NADH dehydrogenase (ubiquinone) activity; F:4 iron, 4 sulfur cluster binding; P:ATP synthesis coupled electron transport; C:membrane	EC:1.6.5.3
JM105664.1	---NA---	606	0			0	-
JM105496.1	---NA---	606	0			0	-
JM105459.1	---NA---	606	0			0	-
JM105148.1	---NA---	605	0			0	-
JM105003.1	---NA---	605	0			0	-
JM104991.1	histone h2b	605	20	5.53e-15	1	6	P:defense response to bacterium; C:nucleosome; F:DNA binding; P:nucleosome assembly; F:protein binding; C:nucleus	-
JM106574.1	---NA---	605	0			0	-
JM106476.1	---NA---	605	0			0	-
JM106433.1	---NA---	605	0			0	-
JM106338.1	---NA---	605	0			0	-
JM106261.1	---NA---	605	0			0	-
JM105741.1	---NA---	605	0			0	-
JM104859.1	endonuclease-reverse transcriptase	604	20	4.98e-32	0.587	0	-
JM104833.1	---NA---	604	0			0	-
JM106718.1	---NA---	604	0			0	-
JM106273.1	---NA---	604	0			0	-
JM106170.1	---NA---	604	0			0	-
JM105960.1	---NA---	604	0			0	-
JM105950.1	---NA---	604	0			0	-
JM105823.1	reverse transcriptase	604	9	2.57e-12	0.6556	3	F:RNA binding; P:RNA-dependent DNA replication; F:RNA-directed DNA polymerase activity
JM105691.1	---NA---	604	0			0	-
JM105578.1	---NA---	604	0			0	-
JM105441.1	---NA---	604	0			0	-
JM105342.1	pol polyprotein	604	9	2.74e-22	0.5256	6	F:RNA binding; F:nucleic acid binding; P:DNA integration; P:RNA-dependent DNA replication; F:RNA-directed DNA polymerase activity; F:DNA binding
JM104995.1	retrotransposon-like family member (retr-1)-like	603	8	2.66e-18	0.52	0	-
JM104775.1	endonuclease-reverse transcriptase	603	1	2.75e-14	0.64	0	-
JM106620.1	---NA---	603	0			0	-
JM106564.1	---NA---	603	0			0	-
JM106339.1	gap-pol poly	603	1	7.99e-14	0.46	0	-
JM105888.1	---NA---	603	0			0	-
JM105549.1	---NA---	603	0			0	-
JM105374.1	---NA---	603	0			0	-
JM104989.1	integrase core domain protein	602	20	5.79e-41	0.609	0	-
JM106712.1	---NA---	602	0			0	-
JM106708.1	endonuclease-reverse transcriptase	602	20	8.61e-20	0.616	3	F:RNA binding; P:RNA-dependent DNA replication; F:RNA-directed DNA polymerase activity
JM106537.1	preprotein translocase subunit	602	20	1.89e-100	0.7645	7	F:P-P-bond-hydrolysis-driven protein transmembrane transporter activity; C:plasma membrane; P:transmembrane transport; C:type II protein secretion system complex; P:intracellular protein transport; C:integral to membrane; P:protein secretion by the type II secretion system	-
JM106181.1	---NA---	602	0			0	-
JM105743.1	---NA---	602	0			0	-
JM105589.1	---NA---	602	0			0	-
JM104927.1	---NA---	601	0			0	-
JM104926.1	---NA---	601	0			0	-
JM104895.1	---NA---	601	0			0	-
JM104894.1	---NA---	601	0			0	-
JM106022.1	---NA---	601	0			0	-
JM105964.1	---NA---	601	0			0	-
JM105816.1	---NA---	601	0			0	-
JM105807.1	reverse transcriptase-like	601	20	5.23e-42	0.5845	3	F:RNA binding; P:RNA-dependent DNA replication; F:RNA-directed DNA polymerase activity
JM105668.1	---NA---	601	0			0	-
JM106774.1	---NA---	600	0			0	-
JM105099.1	---NA---	600	0			0	-
JM104942.1	---NA---	600	0			0	-
JM104910.1	---NA---	600	0			0	-
JM104684.1	---NA---	600	0			0	-
JM106636.1	---NA---	600	0			0	-
JM106585.1	---NA---	600	0			0	-
JM106214.1	---NA---	600	0			0	-
JM105480.1	---NA---	600	0			0	-
JM105315.1	---NA---	600	0			0	-
JM105809.1	chloramphenicol acetyltransferase	599	15	3.47e-30	0.97	1	F:RNA-directed DNA polymerase activity	EC:2.7.7.49
JM105766.1	pol protein	599	20	1.15e-41	0.6415	3	F:RNA binding; P:RNA-dependent DNA replication; F:RNA-directed DNA polymerase activity
JM105165.1	---NA---	598	0			0	-
JM105082.1	---NA---	598	0			0	-
JM104866.1	---NA---	598	0			0	-
JM104959.1	---NA---	597	0			0	-
JM106786.1	alternative oxidase	596	20	1.75e-42	0.54	0	-
JM106604.1	protein	596	20	9.3e-28	0.543	0	-
JM106268.1	---NA---	596	0			0	-
JM106041.1	---NA---	596	0			0	-
JM106025.1	gag-pol polyprotein precursor	596	20	1.14e-17	0.5365	6	F:RNA binding; P:proteolysis; P:RNA-dependent DNA replication; F:aspartic-type endopeptidase activity; F:RNA-directed DNA polymerase activity; F:peptidase activity
JM105332.1	---NA---	596	0			0	-
JM104818.1	n-acetylgalactosaminyltransferase 7	595	20	1.17e-38	0.789	5	F:polypeptide N-acetylgalactosaminyltransferase activity; F:sugar binding; C:Golgi stack; P:oligosaccharide biosynthetic process; C:integral to membrane	EC:2.4.1.41
JM104675.1	---NA---	595	0			0	-
JM106663.1	reverse transcriptase	595	20	2.92e-24	0.56	0	-
JM106460.1	sec15-like 1	595	2	6.25e-16	0.575	0	-
JM106207.1	---NA---	595	0			0	-
JM105484.1	atp synthase delta subunit	595	16	5.43e-44	0.8825	6	C:proton-transporting ATP synthase complex, catalytic core F(1); F:hydrogen ion transporting ATP synthase activity, rotational mechanism; F:endonuclease activity; P:ATP synthesis coupled proton transport; F:DNA binding; C:plasma membrane	EC:3.6.3.14
JM105175.1	endonuclease-reverse transcriptase	595	20	7.35e-33	0.576	0	-
JM105085.1	---NA---	594	0			0	-
JM104752.1	zinc mym domain containing partial	594	5	2.72e-11	0.572	0	-
JM106680.1	histone h2b	594	20	6.47e-13	1	6	P:defense response to bacterium; C:nucleosome; F:DNA binding; P:nucleosome assembly; F:protein binding; C:nucleus	-
JM106148.1	---NA---	594	0			0	-
JM105489.1	---NA---	594	0			0	-
JM104855.1	---NA---	593	0			0	-
JM106632.1	---NA---	593	0			0	-
JM105941.1	---NA---	593	0			0	-
JM105742.1	---NA---	593	0			0	-
JM105436.1	---NA---	593	0			0	-
JM105181.1	retrotransposon ty1-copia subclass	593	20	8.01e-32	0.543	1	F:binding	-
JM105087.1	---NA---	592	0			0	-
JM104938.1	---NA---	592	0			0	-
JM104906.1	---NA---	592	0			0	-
JM106643.1	---NA---	592	0			0	-
JM106584.1	---NA---	592	0			0	-
JM106189.1	---NA---	592	0			0	-
JM105390.1	endonuclease-reverse transcriptase	592	20	3.26e-25	0.5655	0	-
JM105299.1	protein	592	20	3.7e-45	0.63	0	-
JM105059.1	---NA---	591	0			0	-
JM105004.1	---NA---	591	0			0	-
JM104803.1	reverse ribonuclease integrase	591	20	5.6e-37	0.6535	1	F:nucleic acid binding	-
JM106661.1	---NA---	591	0			0	-
JM105618.1	---NA---	591	0			0	-
JM105340.1	---NA---	591	0			0	-
JM105234.1	---NA---	591	0			0	-
JM106023.1	---NA---	590	0			0	-
JM105814.1	---NA---	590	0			0	-
JM105384.1	---NA---	590	0			0	-
JM105351.1	---NA---	590	0			0	-
JM104847.1	---NA---	589	0			0	-
JM106742.1	---NA---	589	0			0	-
JM106610.1	---NA---	589	0			0	-
JM106239.1	---NA---	589	0			0	-
JM105954.1	zinc mym-type 1	589	20	3.44e-49	0.7145	1	F:binding	-
JM105412.1	---NA---	589	0			0	-
JM105200.1	---NA---	589	0			0	-
JM106299.1	---NA---	588	0			0	-
JM105658.1	---NA---	588	0			0	-
JM104892.1	---NA---	587	0			0	-
JM104880.1	endonuclease-reverse transcriptase	587	1	6.14e-20	0.72	0	-
JM105535.1	chloramphenicol acetyltransferase	587	20	3.14e-41	1	2	F:chloramphenicol O-acetyltransferase activity; P:response to antibiotic	EC:2.3.1.28
JM105380.1	---NA---	587	0			0	-
JM106463.1	---NA---	586	0			0	-
JM105290.1	---NA---	586	0			0	-
JM106685.1	---NA---	585	0			0	-
JM106654.1	---NA---	585	0			0	-
JM106006.1	hypothetical protein EAG_00403 [Camponotus floridanus]	585	1	9.86e-11	0.62	0	-
JM105360.1	---NA---	585	0			0	-
JM105028.1	chloramphenicol acetyltransferase	584	20	3.16e-41	1	2	F:chloramphenicol O-acetyltransferase activity; P:response to antibiotic	EC:2.3.1.28
JM104809.1	---NA---	584	0			0	-
JM105738.1	---NA---	584	0			0	-
JM105588.1	endonuclease-reverse transcriptase	584	1	5.08e-15	0.62	0	-
JM105494.1	---NA---	584	0			0	-
JM104790.1	PREDICTED: hypothetical protein LOC100568495 [Acyrthosiphon pisum]	583	2	3.08e-12	0.575	0	-
JM106692.1	---NA---	583	0			0	-
JM106368.1	pol-like protein	583	3	1.43e-17	0.5467	0	-
JM106262.1	---NA---	583	0			0	-
JM106162.1	---NA---	583	0			0	-
JM105019.1	---NA---	582	0			0	-
JM105702.1	---NA---	582	0			0	-
JM105049.1	---NA---	581	0			0	-
JM104957.1	---NA---	581	0			0	-
JM105680.1	zinc knuckle domain protein	581	20	2.02e-24	0.587	5	F:RNA binding; F:nucleic acid binding; P:RNA-dependent DNA replication; F:zinc ion binding; F:RNA-directed DNA polymerase activity
JM105547.1	---NA---	581	0			0	-
JM105488.1	beta-galactosidase alpha-peptide	581	20	5.29e-49	0.9265	0	-
JM105089.1	ga16357- partial	580	1	3.03e-12	0.47	0	-
JM106494.1	---NA---	580	0			0	-
JM105896.1	---NA---	580	0			0	-
JM105877.1	piggybac transposable element derived 4	580	20	3.01e-36	0.599	0	-
JM105514.1	---NA---	580	0			0	-
JM105364.1	---NA---	580	0			0	-
JM105336.1	---NA---	580	0			0	-
JM105079.1	---NA---	579	0			0	-
JM104729.1	---NA---	579	0			0	-
JM106756.1	endonuclease-reverse transcriptase	579	1	2.57e-11	0.62	0	-
JM106640.1	---NA---	579	0			0	-
JM106481.1	ankyrin repeat domain protein	579	1	7.43e-27	0.74	1	F:heat shock protein binding
JM105942.1	---NA---	579	0			0	-
JM104937.1	---NA---	578	0			0	-
JM104905.1	---NA---	578	0			0	-
JM106745.1	---NA---	578	0			0	-
JM105467.1	---NA---	578	0			0	-
JM105156.1	---NA---	577	0			0	-
JM106415.1	beta-galactosidase alpha subunit	577	20	1.51e-48	0.9665	0	-
JM106387.1	hypothetical protein TcasGA2_TC001839 [Tribolium castaneum]	577	3	1.48e-11	0.7033	0	-
JM105876.1	hypothetical protein SINV_08178 [Solenopsis invicta]	577	2	7.58e-21	0.505	0	-
JM105565.1	---NA---	577	0			0	-
JM105183.1	---NA---	577	0			0	-
JM106586.1	---NA---	576	0			0	-
JM106491.1	---NA---	576	0			0	-
JM106279.1	phosphoglyceromutase	576	20	2.56e-72	0.838	4	C:cytoplasm; F:manganese ion binding; F:2,3-bisphosphoglycerate-independent phosphoglycerate mutase activity; P:glycolysis	-
JM106136.1	ap-like endonuclease reverse transcriptase	576	20	8.62e-36	0.538	6	F:RNA binding; F:nucleic acid binding; P:RNA-dependent DNA replication; F:ribonuclease H activity; F:RNA-directed DNA polymerase activity; F:endonuclease activity
JM105908.1	---NA---	576	0			0	-
JM105701.1	---NA---	576	0			0	-
JM105263.1	endonuclease-reverse transcriptase	576	20	1.09e-30	0.6225	3	F:RNA binding; P:RNA-dependent DNA replication; F:RNA-directed DNA polymerase activity
JM105172.1	---NA---	575	0			0	-
JM106346.1	---NA---	575	0			0	-
JM106334.1	---NA---	575	0			0	-
JM105269.1	---NA---	575	0			0	-
JM105117.1	pol protein	574	20	1.59e-42	0.5985	1	F:transferase activity	-
JM105024.1	---NA---	574	0			0	-
JM106736.1	replication initiation protein	574	20	1.29e-92	0.9755	4	F:DNA-directed DNA polymerase activity; P:plasmid maintenance; P:DNA replication initiation; C:extrachromosomal circular DNA	EC:2.7.7.7
JM106582.1	---NA---	574	0			0	-
JM106507.1	---NA---	574	0			0	-
JM106484.1	---NA---	574	0			0	-
JM106235.1	---NA---	574	0			0	-
JM106179.1	---NA---	574	0			0	-
JM105930.1	---NA---	574	0			0	-
JM105458.1	reverse transcriptase	574	3	5.04e-14	0.64	3	F:RNA binding; P:RNA-dependent DNA replication; F:RNA-directed DNA polymerase activity
JM104708.1	---NA---	573	0			0	-
JM106651.1	endonuclease-reverse transcriptase	573	10	3.47e-13	0.678	3	F:RNA binding; P:RNA-dependent DNA replication; F:RNA-directed DNA polymerase activity
JM106098.1	---NA---	573	0			0	-
JM105287.1	bel12_ag transposon polyprotein	573	20	4.64e-42	0.627	3	F:nucleic acid binding; P:DNA integration; F:DNA binding
JM106630.1	zinc mym domain containing 1	572	11	9.08e-17	0.7736	0	-
JM105684.1	---NA---	572	0			0	-
JM105280.1	---NA---	572	0			0	-
JM105271.1	---NA---	572	0			0	-
JM104862.1	transposase	571	20	2.6e-21	0.5795	0	-
JM106478.1	reverse transcriptase	571	20	2.06e-18	0.5995	5	F:RNA binding; P:RNA-dependent DNA replication; F:RNA-directed DNA polymerase activity; F:nucleotidyltransferase activity; F:transferase activity
JM105215.1	---NA---	571	0			0	-
JM104802.1	---NA---	570	0			0	-
JM106410.1	---NA---	570	0			0	-
JM106099.1	---NA---	570	0			0	-
JM105538.1	---NA---	570	0			0	-
JM105177.1	endonuclease-reverse transcriptase	570	20	1.37e-38	0.579	4	F:RNA binding; P:RNA-dependent DNA replication; F:endonuclease activity; F:RNA-directed DNA polymerase activity
JM104691.1	---NA---	569	0			0	-
JM104683.1	---NA---	569	0			0	-
JM106727.1	---NA---	569	0			0	-
JM106406.1	---NA---	569	0			0	-
JM106291.1	dmt superfamily permease	569	20	6.02e-63	0.9	1	C:membrane	-
JM105523.1	---NA---	569	0			0	-
JM105278.1	---NA---	569	0			0	-
JM106250.1	---NA---	568	0			0	-
JM106244.1	hypothetical protein TcasGA2_TC001985 [Tribolium castaneum]	568	1	6.99e-11	0.59	0	-
JM106114.1	---NA---	568	0			0	-
JM105869.1	rna-directed dna polymerase from mobile element jockey	568	6	6.52e-17	0.545	3	F:RNA binding; P:RNA-dependent DNA replication; F:RNA-directed DNA polymerase activity
JM105372.1	---NA---	568	0			0	-
JM105074.1	---NA---	567	0			0	-
JM104780.1	endonuclease-reverse transcriptase	567	20	1.22e-47	0.586	4	F:RNA binding; P:RNA-dependent DNA replication; F:endonuclease activity; F:RNA-directed DNA polymerase activity
JM106691.1	---NA---	567	0			0	-
JM106533.1	tigger transposable element-derived protein 1	567	20	8.18e-44	0.639	2	F:nucleic acid binding; F:DNA binding
JM106485.1	---NA---	567	0			0	-
JM105822.1	---NA---	567	0			0	-
JM105551.1	---NA---	567	0			0	-
JM105540.1	---NA---	567	0			0	-
JM105078.1	---NA---	566	0			0	-
JM104699.1	---NA---	566	0			0	-
JM106608.1	---NA---	566	0			0	-
JM106111.1	scan domain-containing protein 3-like	566	20	1.47e-21	0.587	2	C:nucleolus; F:binding	-
JM105655.1	---NA---	566	0			0	-
JM104679.1	---NA---	565	0			0	-
JM106748.1	---NA---	565	0			0	-
JM106577.1	---NA---	565	0			0	-
JM106373.1	---NA---	565	0			0	-
JM105524.1	---NA---	565	0			0	-
JM105421.1	---NA---	565	0			0	-
JM105167.1	---NA---	564	0			0	-
JM104958.1	---NA---	564	0			0	-
JM104770.1	transposase	564	20	1.57e-31	0.6205	0	-
JM106267.1	endonuclease-reverse transcriptase	564	19	4.91e-17	0.5268	4	F:RNA binding; P:RNA-dependent DNA replication; F:RNA-directed DNA polymerase activity; F:endonuclease activity
JM105991.1	histone h2b	564	20	4.59e-15	1	6	P:defense response to bacterium; C:nucleosome; F:DNA binding; P:nucleosome assembly; F:protein binding; C:nucleus	-
JM105431.1	---NA---	564	0			0	-
JM104792.1	endonuclease-reverse transcriptase	563	5	7.42e-26	0.516	0	-
JM105893.1	---NA---	563	0			0	-
JM105474.1	---NA---	563	0			0	-
JM104718.1	juvenile hormone-inducible	562	20	1.88e-37	0.528	0	-
JM106448.1	---NA---	562	0			0	-
JM104777.1	transposable element tc3 transposase	561	20	4.05e-39	0.5835	0	-
JM105275.1	hypothetical protein TcasGA2_TC001664 [Tribolium castaneum]	561	2	2.68e-12	0.57	3	F:RNA binding; P:RNA-dependent DNA replication; F:RNA-directed DNA polymerase activity
JM105154.1	chloramphenicol acetyltransferase	560	20	2.58e-39	0.951	2	F:chloramphenicol O-acetyltransferase activity; P:response to antibiotic	EC:2.3.1.28
JM106540.1	---NA---	560	0			0	-
JM106271.1	dna pol b2 domain-containing protein	560	20	4.26e-34	0.7155	0	-
JM106637.1	ankyrin unc44	559	3	4.92e-13	0.64	0	-
JM106625.1	endonuclease-reverse transcriptase	559	1	8.1e-13	0.56	0	-
JM106425.1	histone h2b	559	20	8.63e-19	0.967	5	C:nucleosome; F:DNA binding; P:nucleosome assembly; C:lipid particle; C:NuA4 histone acetyltransferase complex	-
JM106116.1	---NA---	559	0			0	-
JM106031.1	phage uncharacterized protein	559	20	1.18e-92	0.759	1	P:biological_process
JM105634.1	---NA---	559	0			0	-
JM105146.1	transposon-derived buster3 transposase-like protein	558	11	1.87e-45	0.5764	0	-
JM105055.1	---NA---	558	0			0	-
JM104717.1	---NA---	558	0			0	-
JM106729.1	---NA---	558	0			0	-
JM106674.1	---NA---	558	0			0	-
JM106469.1	---NA---	558	0			0	-
JM106135.1	---NA---	558	0			0	-
JM105337.1	---NA---	558	0			0	-
JM106165.1	endonuclease-reverse transcriptase	557	11	2.23e-17	0.5064	0	-
JM105435.1	---NA---	557	0			0	-
JM105132.1	---NA---	556	0			0	-
JM106587.1	bifunctional proline dehydrogenase pyrroline-5-carboxylate dehydrogenase	556	20	1.48e-47	0.9675	6	P:glutamate biosynthetic process; F:1-pyrroline-5-carboxylate dehydrogenase activity; P:proline catabolic process; P:oxidation reduction; P:proline biosynthetic process; F:proline dehydrogenase activity	EC:1.5.1.12; EC:1.5.99.8
JM106451.1	endonuclease-reverse transcriptase	556	20	6.11e-33	0.6255	3	F:RNA binding; P:RNA-dependent DNA replication; F:RNA-directed DNA polymerase activity
JM106259.1	---NA---	556	0			0	-
JM106121.1	---NA---	556	0			0	-
JM105579.1	---NA---	556	0			0	-
JM105352.1	endonuclease-reverse transcriptase	556	8	2.81e-30	0.51	0	-
JM106245.1	zinc finger mym-type protein 1	555	3	8.89e-28	0.5633	1	F:protein dimerization activity
JM105665.1	---NA---	555	0			0	-
JM105316.1	bel12_ag transposon polyprotein	555	20	1.6e-17	0.652	6	P:proteolysis; F:aspartic-type endopeptidase activity; F:nucleic acid binding; P:DNA integration; F:zinc ion binding; F:DNA binding
JM104879.1	tpa: endonuclease-reverse transcriptase	554	1	3.1e-11	0.56	0	-
JM104698.1	---NA---	554	0			0	-
JM106693.1	---NA---	554	0			0	-
JM106341.1	endonuclease-reverse transcriptase	554	20	4.22e-26	0.5305	4	F:RNA binding; P:RNA-dependent DNA replication; F:RNA-directed DNA polymerase activity; F:endonuclease activity
JM105993.1	---NA---	554	0			0	-
JM105433.1	---NA---	554	0			0	-
JM106716.1	hypothetical protein TcasGA2_TC001429 [Tribolium castaneum]	553	4	5.91e-12	0.6	0	-
JM106688.1	---NA---	553	0			0	-
JM106355.1	---NA---	553	0			0	-
JM106177.1	endopeptidase-related protein	553	11	1.17e-76	0.7436	2	F:metalloendopeptidase activity; P:proteolysis	EC:3.4.24.0
JM105874.1	---NA---	553	0			0	-
JM105557.1	---NA---	553	0			0	-
JM105217.1	---NA---	553	0			0	-
JM104876.1	---NA---	552	0			0	-
JM106210.1	---NA---	552	0			0	-
JM105446.1	---NA---	552	0			0	-
JM104773.1	---NA---	551	0			0	-
JM105570.1	---NA---	551	0			0	-
JM104745.1	---NA---	550	0			0	-
JM106715.1	---NA---	550	0			0	-
JM106176.1	pol-like protein	550	6	5.23e-21	0.5433	5	F:RNA binding; F:nucleic acid binding; P:RNA-dependent DNA replication; F:ribonuclease H activity; F:RNA-directed DNA polymerase activity
JM106172.1	---NA---	550	0			0	-
JM105875.1	ac transposable element-derived protein 4	550	16	3.62e-22	0.5488	0	-
JM105763.1	pol protein	550	20	1.62e-38	0.6715	3	F:RNA binding; P:RNA-dependent DNA replication; F:RNA-directed DNA polymerase activity
JM105442.1	---NA---	550	0			0	-
JM105070.1	---NA---	549	0			0	-
JM104645.1	tyrosine recombinase	549	11	5.41e-17	0.5818	3	P:DNA integration; P:DNA recombination; F:DNA binding
JM106424.1	---NA---	549	0			0	-
JM104841.1	---NA---	548	0			0	-
JM104826.1	---NA---	548	0			0	-
JM106411.1	---NA---	548	0			0	-
JM106026.1	---NA---	548	0			0	-
JM105490.1	---NA---	548	0			0	-
JM105108.1	---NA---	547	0			0	-
JM106744.1	reverse	547	12	9.66e-28	0.6	3	F:RNA binding; P:RNA-dependent DNA replication; F:RNA-directed DNA polymerase activity
JM106442.1	---NA---	547	0			0	-
JM106413.1	---NA---	547	0			0	-
JM105995.1	---NA---	547	0			0	-
JM105961.1	---NA---	547	0			0	-
JM105223.1	---NA---	547	0			0	-
JM104986.1	ankyrin repeat domain protein	546	20	1.21e-70	0.742	0	-
JM106078.1	---NA---	546	0			0	-
JM105671.1	---NA---	546	0			0	-
JM105247.1	---NA---	546	0			0	-
JM104733.1	abhydrolase domain containing isoform cra_a	545	17	3.5e-14	0.8676	3	F:hydrolase activity; C:cytoplasm; C:integral to membrane	-
JM106489.1	---NA---	545	0			0	-
JM105449.1	chloramphenicol acetyltransferase	545	20	2.57e-41	1	2	F:chloramphenicol O-acetyltransferase activity; P:response to antibiotic	EC:2.3.1.28
JM106263.1	---NA---	544	0			0	-
JM106088.1	---NA---	544	0			0	-
JM105996.1	ap-like endonuclease reverse transcriptase	544	20	3.85e-29	0.521	6	F:RNA binding; F:nucleic acid binding; P:RNA-dependent DNA replication; F:ribonuclease H activity; F:RNA-directed DNA polymerase activity; F:endonuclease activity
JM105289.1	---NA---	544	0			0	-
JM104680.1	---NA---	543	0			0	-
JM106558.1	---NA---	543	0			0	-
JM106349.1	---NA---	543	0			0	-
JM104930.1	---NA---	542	0			0	-
JM104898.1	---NA---	542	0			0	-
JM104853.1	---NA---	542	0			0	-
JM106647.1	---NA---	542	0			0	-
JM106010.1	endonuclease-reverse transcriptase	542	1	1.23e-17	0.63	0	-
JM105756.1	histone h2b	542	20	1.03e-18	1	6	P:defense response to bacterium; C:nucleosome; F:DNA binding; P:nucleosome assembly; F:protein binding; C:nucleus	-
JM105509.1	---NA---	542	0			0	-
JM104983.1	reverse ribonuclease integrase	541	20	1.26e-24	0.5705	0	-
JM106290.1	catalase	541	20	5.57e-86	0.845	7	P:threonine biosynthetic process; P:hydrogen peroxide catabolic process; F:homoserine kinase activity; P:oxidation reduction; F:catalase activity; F:ATP binding; F:heme binding	EC:2.7.1.39; EC:1.11.1.6
JM106234.1	catalase	541	20	5.57e-86	0.845	7	P:threonine biosynthetic process; P:hydrogen peroxide catabolic process; F:homoserine kinase activity; P:oxidation reduction; F:catalase activity; F:ATP binding; F:heme binding	EC:2.7.1.39; EC:1.11.1.6
JM106206.1	---NA---	541	0			0	-
JM105830.1	---NA---	541	0			0	-
JM105821.1	---NA---	541	0			0	-
JM105727.1	pol-like protein	541	6	1.64e-16	0.4567	5	F:RNA binding; F:nucleic acid binding; P:RNA-dependent DNA replication; F:ribonuclease H activity; F:RNA-directed DNA polymerase activity
JM104678.1	---NA---	540	0			0	-
JM106223.1	---NA---	540	0			0	-
JM105801.1	endonuclease-reverse transcriptase	540	2	2.37e-15	0.685	0	-
JM105279.1	endonuclease-reverse transcriptase	540	1	5.11e-18	0.71	0	-
JM106434.1	---NA---	539	0			0	-
JM105328.1	hypothetical protein CRE_17462 [Caenorhabditis remanei]	539	2	5.36e-12	0.585	0	-
JM105248.1	---NA---	539	0			0	-
JM106633.1	---NA---	538	0			0	-
JM106308.1	---NA---	538	0			0	-
JM105731.1	gag-pol polyprotein	538	20	1.6e-32	0.6055	8	F:RNA binding; F:nucleic acid binding; P:proteolysis; P:DNA integration; P:RNA-dependent DNA replication; F:aspartic-type endopeptidase activity; F:RNA-directed DNA polymerase activity; F:DNA binding
JM105478.1	---NA---	538	0			0	-
JM104794.1	zinc finger mym-type protein 1-like	537	2	9.11e-30	0.7	0	-
JM106646.1	---NA---	537	0			0	-
JM105712.1	histone h2b	537	20	2.33e-15	0.9815	5	C:nucleosome; F:DNA binding; P:nucleosome assembly; C:lipid particle; C:NuA4 histone acetyltransferase complex	-
JM105385.1	---NA---	537	0			0	-
JM104987.1	---NA---	536	0			0	-
JM104798.1	succinate-semialdehyde dehydrogenase	536	20	2.65e-64	0.8735	2	P:oxidation reduction; F:succinate-semialdehyde dehydrogenase [NAD(P)+] activity	EC:1.2.1.16
JM104692.1	---NA---	536	0			0	-
JM106372.1	---NA---	536	0			0	-
JM106767.1	---NA---	535	0			0	-
JM105245.1	beta-galactosidase alpha-peptide	535	20	4.11e-49	0.926	0	-
JM105188.1	---NA---	535	0			0	-
JM105092.1	reverse ribonuclease integrase	534	20	4.87e-42	0.6935	3	P:DNA metabolic process; F:nucleic acid binding; F:catalytic activity	-
JM105790.1	---NA---	534	0			0	-
JM105737.1	---NA---	534	0			0	-
JM104694.1	---NA---	533	0			0	-
JM106634.1	hypothetical protein TcasGA2_TC000010 [Tribolium castaneum]	533	1	4.5e-16	0.56	0	-
JM106616.1	---NA---	533	0			0	-
JM106393.1	---NA---	533	0			0	-
JM104828.1	---NA---	532	0			0	-
JM105707.1	---NA---	532	0			0	-
JM105415.1	---NA---	532	0			0	-
JM106697.1	---NA---	531	0			0	-
JM106461.1	---NA---	531	0			0	-
JM106092.1	endonuclease reverse transcriptase	531	20	6.88e-26	0.577	3	F:RNA binding; P:RNA-dependent DNA replication; F:RNA-directed DNA polymerase activity
JM105582.1	---NA---	531	0			0	-
JM105345.1	---NA---	531	0			0	-
JM104852.1	endonuclease-reverse transcriptase	530	20	2.81e-42	0.642	3	F:RNA binding; P:RNA-dependent DNA replication; F:RNA-directed DNA polymerase activity
JM106252.1	---NA---	530	0			0	-
JM105463.1	---NA---	530	0			0	-
JM104749.1	endonuclease-reverse transcriptase	529	8	1.26e-34	0.615	4	F:RNA binding; P:RNA-dependent DNA replication; F:RNA-directed DNA polymerase activity; F:endonuclease activity
JM106423.1	---NA---	529	0			0	-
JM106363.1	---NA---	529	0			0	-
JM105936.1	---NA---	529	0			0	-
JM106402.1	---NA---	528	0			0	-
JM106773.1	---NA---	527	0			0	-
JM104725.1	---NA---	527	0			0	-
JM105257.1	---NA---	527	0			0	-
JM104878.1	---NA---	526	0			0	-
JM106416.1	---NA---	526	0			0	-
JM106112.1	---NA---	526	0			0	-
JM105644.1	---NA---	526	0			0	-
JM105140.1	endonuclease-reverse transcriptase	525	3	3.17e-14	0.5133	0	-
JM106731.1	---NA---	525	0			0	-
JM106535.1	---NA---	525	0			0	-
JM105546.1	---NA---	525	0			0	-
JM105505.1	PREDICTED: hypothetical protein LOC100570869 [Acyrthosiphon pisum]	525	4	6.98e-13	0.6975	0	-
JM106764.1	---NA---	524	0			0	-
JM106565.1	transcriptional regulator	524	20	2.48e-88	0.895	2	F:transcription factor activity; P:regulation of transcription, DNA-dependent	-
JM106509.1	transcriptional regulator	524	20	2.48e-88	0.895	2	F:transcription factor activity; P:regulation of transcription, DNA-dependent	-
JM106269.1	---NA---	524	0			0	-
JM105138.1	---NA---	523	0			0	-
JM106522.1	---NA---	523	0			0	-
JM104643.1	rep family	522	20	1.45e-96	0.8515	6	P:DNA unwinding involved in replication; F:exonuclease activity; F:DNA binding; F:ATP-dependent DNA helicase activity; F:ATP binding; P:DNA repair	-
JM106547.1	---NA---	522	0			0	-
JM106458.1	reverse transcriptase	522	20	2.36e-30	0.6	3	F:RNA binding; P:RNA-dependent DNA replication; F:RNA-directed DNA polymerase activity
JM106329.1	---NA---	521	0			0	-
JM105695.1	---NA---	521	0			0	-
JM105338.1	---NA---	521	0			0	-
JM105053.1	beta-galactosidase alpha-peptide	520	20	3.79e-49	0.9265	0	-
JM106011.1	ap-like endonuclease reverse transcriptase	520	20	1.66e-28	0.5685	6	F:RNA binding; F:nucleic acid binding; P:RNA-dependent DNA replication; F:ribonuclease H activity; F:RNA-directed DNA polymerase activity; F:endonuclease activity
JM106188.1	---NA---	519	0			0	-
JM105334.1	---NA---	519	0			0	-
JM105102.1	---NA---	518	0			0	-
JM106276.1	---NA---	518	0			0	-
JM104967.1	---NA---	517	0			0	-
JM106477.1	---NA---	517	0			0	-
JM106417.1	---NA---	516	0			0	-
JM105949.1	---NA---	516	0			0	-
JM105194.1	---NA---	516	0			0	-
JM105150.1	chloramphenicol acetyltransferase	515	20	2.13e-41	1	2	F:chloramphenicol O-acetyltransferase activity; P:response to antibiotic	EC:2.3.1.28
JM106166.1	---NA---	515	0			0	-
JM105532.1	---NA---	514	0			0	-
JM105497.1	---NA---	514	0			0	-
JM106467.1	---NA---	513	0			0	-
JM106404.1	endonuclease-reverse transcriptase	513	20	1.81e-16	0.554	5	F:RNA-directed DNA polymerase activity; F:RNA binding; P:RNA-dependent DNA replication; F:DNA binding; F:endonuclease activity
JM105182.1	---NA---	513	0			0	-
JM106678.1	---NA---	512	0			0	-
JM106384.1	---NA---	512	0			0	-
JM106283.1	---NA---	512	0			0	-
JM106251.1	---NA---	512	0			0	-
JM106644.1	endonuclease-reverse transcriptase	511	3	6.9e-24	0.6167	0	-
JM105933.1	ankyrin repeat domain protein	511	16	5.29e-37	0.5619	2	P:apoptosis; F:ATP binding
JM105690.1	zinc finger mym-type protein 1-like	511	20	9.31e-42	0.6405	1	F:protein dimerization activity
JM105249.1	---NA---	511	0			0	-
JM105144.1	---NA---	510	0			0	-
JM106140.1	---NA---	510	0			0	-
JM105718.1	---NA---	510	0			0	-
JM105681.1	hypothetical protein DAPPUDRAFT_67127 [Daphnia pulex]	510	20	1.22e-17	0.8115	0	-
JM105277.1	---NA---	510	0			0	-
JM105123.1	---NA---	509	0			0	-
JM104980.1	---NA---	509	0			0	-
JM104721.1	---NA---	509	0			0	-
JM105635.1	---NA---	509	0			0	-
JM105225.1	---NA---	509	0			0	-
JM105033.1	---NA---	508	0			0	-
JM104972.1	PREDICTED: hypothetical protein LOC100571480 [Acyrthosiphon pisum]	508	2	1.31e-19	0.66	0	-
JM106541.1	predicted protein [Trichoplax adhaerens]	507	1	8.44e-12	0.75	0	-
JM106330.1	---NA---	507	0			0	-
JM106265.1	alpha-galactosidase	507	20	5.41e-90	0.902	2	P:carbohydrate metabolic process; F:alpha-galactosidase activity	EC:3.2.1.22
JM105723.1	---NA---	507	0			0	-
JM105326.1	---NA---	507	0			0	-
JM106086.1	---NA---	506	0			0	-
JM105674.1	---NA---	506	0			0	-
JM104705.1	---NA---	505	0			0	-
JM106760.1	---NA---	505	0			0	-
JM105362.1	---NA---	505	0			0	-
JM105002.1	---NA---	504	0			0	-
JM105937.1	---NA---	504	0			0	-
JM105553.1	---NA---	504	0			0	-
JM105482.1	---NA---	504	0			0	-
JM105270.1	---NA---	504	0			0	-
JM104642.1	---NA---	504	0			0	-
JM106195.1	---NA---	503	0			0	-
JM106075.1	---NA---	503	0			0	-
JM105997.1	PREDICTED: hypothetical protein LOC100568546 [Acyrthosiphon pisum]	503	1	4.16e-15	0.57	0	-
JM106107.1	---NA---	502	0			0	-
JM106645.1	---NA---	501	0			0	-
JM104686.1	endonuclease-reverse transcriptase	500	1	5.17e-15	0.63	0	-
JM106682.1	---NA---	500	0			0	-
JM106487.1	---NA---	499	0			0	-
JM106297.1	---NA---	499	0			0	-
JM105169.1	---NA---	498	0			0	-
JM104984.1	---NA---	498	0			0	-
JM104716.1	---NA---	498	0			0	-
JM104697.1	transposase	498	20	2.22e-16	0.655	0	-
JM106655.1	---NA---	498	0			0	-
JM104882.1	endonuclease-reverse transcriptase	497	7	7.38e-28	0.6257	0	-
JM104808.1	---NA---	497	0			0	-
JM105882.1	---NA---	496	0			0	-
JM106536.1	hypothetical protein WRi_008710 [Wolbachia sp. wRi]	495	11	1.48e-44	0.8064	1	F:exonuclease activity	-
JM106775.1	pol protein	493	20	1.18e-41	0.5845	1	F:transferase activity	-
JM106759.1	---NA---	493	0			0	-
JM106689.1	---NA---	493	0			0	-
JM106483.1	---NA---	493	0			0	-
JM106793.1	---NA---	492	0			0	-
JM106772.1	---NA---	492	0			0	-
JM106529.1	phage uncharacterized protein	492	20	1.09e-71	0.7625	1	P:biological_process
JM105143.1	---NA---	491	0			0	-
JM106670.1	reverse transcriptase-like	491	6	6.53e-24	0.615	0	-
JM106361.1	endonuclease-reverse transcriptase	491	20	3.14e-18	0.62	4	F:RNA binding; P:RNA-dependent DNA replication; F:RNA-directed DNA polymerase activity; F:endonuclease activity
JM106203.1	---NA---	491	0			0	-
JM106169.1	histone h2b	491	20	4.23e-23	0.983	5	C:nucleosome; F:DNA binding; P:nucleosome assembly; C:lipid particle; C:NuA4 histone acetyltransferase complex	-
JM105711.1	histone h2b	491	20	8.26e-19	1	6	P:defense response to bacterium; C:nucleosome; F:DNA binding; P:nucleosome assembly; F:protein binding; C:nucleus	-
JM106468.1	reverse	490	20	1.6e-38	0.637	3	F:RNA binding; P:RNA-dependent DNA replication; F:RNA-directed DNA polymerase activity
JM105353.1	---NA---	490	0			0	-
JM105288.1	---NA---	490	0			0	-
JM105273.1	---NA---	490	0			0	-
JM105629.1	---NA---	489	0			0	-
JM104688.1	---NA---	488	0			0	-
JM104953.1	cyp2d6-a-prov protein	487	2	3.26e-15	0.5	0	-
JM104921.1	cyp2d6-a-prov protein	487	2	3.26e-15	0.5	0	-
JM106538.1	---NA---	486	0			0	-
JM106360.1	endonuclease-reverse transcriptase	486	1	6.8e-13	0.49	0	-
JM106301.1	endonuclease-reverse transcriptase	486	20	5.54e-31	0.5935	3	F:RNA binding; P:RNA-dependent DNA replication; F:RNA-directed DNA polymerase activity
JM106621.1	---NA---	485	0			0	-
JM105651.1	---NA---	485	0			0	-
JM106488.1	---NA---	483	0			0	-
JM105775.1	zinc mym domain containing 1	483	7	1.86e-18	0.5657	0	-
JM105001.1	---NA---	482	0			0	-
JM104934.1	PREDICTED: hypothetical protein LOC100570869 [Acyrthosiphon pisum]	482	5	2e-17	0.62	0	-
JM104902.1	PREDICTED: hypothetical protein LOC100570869 [Acyrthosiphon pisum]	482	5	2e-17	0.62	0	-
JM106449.1	---NA---	482	0			0	-
JM105358.1	transposase	482	5	4.91e-24	0.836	3	P:transposition, DNA-mediated; F:transposase activity; F:DNA binding	-
JM104858.1	nad-glutamate dehydrogenase	481	20	3.16e-66	0.887	3	P:oxidation reduction; F:glutamate dehydrogenase activity; F:binding	EC:1.4.1.2
JM106562.1	---NA---	481	0			0	-
JM105366.1	---NA---	481	0			0	-
JM104724.1	---NA---	479	0			0	-
JM106184.1	tpa: pol polyprotein	479	19	9.47e-14	0.6263	4	F:nucleic acid binding; P:cellular process; P:macromolecule metabolic process; P:primary metabolic process	-
JM106660.1	---NA---	478	0			0	-
JM106563.1	peptide chain release factor 3	478	19	7.38e-20	0.9616	5	C:cytoplasm; F:GTP binding; F:translation release factor activity, codon specific; P:regulation of translational termination; F:GTPase activity	EC:3.6.5.1; EC:3.6.5.2; EC:3.6.5.3; EC:3.6.5.4
JM106512.1	---NA---	478	0			0	-
JM105719.1	---NA---	477	0			0	-
JM105592.1	---NA---	477	0			0	-
JM106659.1	endonuclease-reverse transcriptase	476	2	4.07e-18	0.55	0	-
JM106542.1	---NA---	476	0			0	-
JM106443.1	---NA---	476	0			0	-
JM105890.1	---NA---	476	0			0	-
JM105881.1	---NA---	476	0			0	-
JM105827.1	---NA---	476	0			0	-
JM106600.1	outer membrane protein assembly factor	475	20	6.37e-80	0.949	2	C:plasma membrane; C:cell outer membrane	-
JM105109.1	---NA---	474	0			0	-
JM106576.1	integrase core domain protein	474	20	4.05e-34	0.6125	0	-
JM105531.1	---NA---	473	0			0	-
JM106427.1	conserved protein ucp030820	472	20	1.94e-52	0.9585	0	-
JM106080.1	ac transposase	472	2	6.3e-19	0.7	0	-
JM105647.1	---NA---	472	0			0	-
JM105072.1	non-ltr retrotransposon r1bmks orf2 protein	471	20	3.56e-30	0.57	1	F:binding	-
JM106224.1	---NA---	471	0			0	-
JM105648.1	---NA---	471	0			0	-
JM105522.1	endonuclease-reverse transcriptase	471	20	1.14e-19	0.591	4	F:RNA binding; P:RNA-dependent DNA replication; F:RNA-directed DNA polymerase activity; F:endonuclease activity
JM105454.1	---NA---	471	0			0	-
JM104970.1	---NA---	470	0			0	-
JM106626.1	---NA---	470	0			0	-
JM105272.1	---NA---	470	0			0	-
JM104857.1	nadp-dependent malic enzyme	469	20	4.99e-32	0.879	9	F:metal ion binding; F:NAD or NADH binding; C:cell outer membrane; F:malate dehydrogenase (oxaloacetate-decarboxylating) activity; P:malate metabolic process; P:oxidation reduction; C:integral to membrane; F:malate dehydrogenase (oxaloacetate-decarboxylating) (NADP+) activity; F:phosphate acetyltransferase activity	EC:1.1.1.38; EC:1.1.1.40; EC:2.3.1.8
JM105659.1	---NA---	468	0			0	-
JM106598.1	rod shape-determining protein	467	20	2.22e-72	0.796	4	P:cell cycle; C:integral to membrane; P:regulation of cell shape; P:cell division	-
JM105836.1	---NA---	467	0			0	-
JM105828.1	---NA---	467	0			0	-
JM104861.1	---NA---	466	0			0	-
JM106302.1	---NA---	466	0			0	-
JM105164.1	bel12_ag transposon polyprotein	465	20	8.25e-43	0.693	3	P:DNA metabolic process; F:nucleic acid binding; F:catalytic activity	-
JM105244.1	hypothetical protein S18_1082_0001 [uncultured Flavobacteria bacterium]	465	3	2.03e-41	1	0	-
JM104681.1	l _3	464	1	4.9e-11	0.61	0	-
JM106534.1	---NA---	463	0			0	-
JM106260.1	---NA---	463	0			0	-
JM104870.1	---NA---	462	0			0	-
JM106201.1	---NA---	462	0			0	-
JM106087.1	---NA---	461	0			0	-
JM106134.1	---NA---	460	0			0	-
JM106014.1	---NA---	460	0			0	-
JM105283.1	---NA---	460	0			0	-
JM106513.1	---NA---	459	0			0	-
JM106102.1	---NA---	459	0			0	-
JM106627.1	---NA---	458	0			0	-
JM106094.1	---NA---	458	0			0	-
JM106623.1	---NA---	457	0			0	-
JM104734.1	---NA---	456	0			0	-
JM105879.1	---NA---	456	0			0	-
JM105151.1	alpha peptide	455	20	2.53e-44	0.9835	0	-
JM104968.1	tpr domain protein	455	8	3.87e-77	0.9338	1	F:binding	-
JM104703.1	hypothetical protein TcasGA2_TC005297 [Tribolium castaneum]	454	20	2.15e-27	0.5915	0	-
JM106672.1	---NA---	454	0			0	-
JM106205.1	---NA---	454	0			0	-
JM106157.1	---NA---	454	0			0	-
JM105021.1	endonuclease-reverse transcriptase	453	3	5.13e-21	0.5967	0	-
JM104875.1	beta-galactosidase alpha-peptide	453	20	3.41e-49	0.926	0	-
JM106332.1	endonuclease-reverse transcriptase	453	5	2.38e-18	0.578	0	-
JM105178.1	---NA---	452	0			0	-
JM105093.1	---NA---	451	0			0	-
JM106690.1	lian-aa1 retrotransposon protein	451	3	1.07e-18	0.5	5	F:RNA binding; F:nucleic acid binding; P:RNA-dependent DNA replication; F:ribonuclease H activity; F:RNA-directed DNA polymerase activity
JM105753.1	---NA---	451	0			0	-
JM104805.1	---NA---	449	0			0	-
JM106500.1	sil1 protein	449	14	6.73e-37	0.6236	0	-
JM106407.1	---NA---	448	0			0	-
JM104793.1	---NA---	447	0			0	-
JM106667.1	endonuclease-reverse transcriptase	447	1	3.01e-11	0.52	0	-
JM106196.1	---NA---	447	0			0	-
JM106108.1	---NA---	447	0			0	-
JM106071.1	---NA---	447	0			0	-
JM105191.1	---NA---	446	0			0	-
JM104877.1	---NA---	445	0			0	-
JM106492.1	---NA---	445	0			0	-
JM106629.1	---NA---	444	0			0	-
JM106403.1	endonuclease-reverse transcriptase	444	20	2.86e-25	0.6255	0	-
JM106033.1	---NA---	444	0			0	-
JM104719.1	pol-like protein	442	10	5.21e-29	0.709	2	F:nucleic acid binding; F:zinc ion binding
JM104931.1	---NA---	441	0			0	-
JM104899.1	---NA---	441	0			0	-
JM104715.1	---NA---	441	0			0	-
JM106333.1	---NA---	440	0			0	-
JM105260.1	---NA---	440	0			0	-
JM106218.1	---NA---	439	0			0	-
JM106741.1	---NA---	438	0			0	-
JM106409.1	---NA---	438	0			0	-
JM106397.1	---NA---	436	0			0	-
JM105554.1	---NA---	435	0			0	-
JM106787.1	hypothetical protein TcasGA2_TC001429 [Tribolium castaneum]	434	6	4.05e-26	0.605	0	-
JM104700.1	endonuclease-reverse transcriptase	434	1	5.46e-19	0.72	0	-
JM106753.1	hypothetical protein BRAFLDRAFT_119633 [Branchiostoma floridae]	434	20	3.66e-27	0.7575	3	F:zinc ion binding; F:nucleic acid binding; C:intracellular	-
JM106438.1	---NA---	434	0			0	-
JM106186.1	---NA---	434	0			0	-
JM106350.1	---NA---	433	0			0	-
JM105187.1	---NA---	433	0			0	-
JM106437.1	---NA---	432	0			0	-
JM104872.1	gtp-binding protein	431	20	1.93e-63	0.853	4	F:translation elongation factor activity; C:intracellular; F:GTPase activity; F:GTP binding	EC:3.6.5.1; EC:3.6.5.2; EC:3.6.5.3; EC:3.6.5.4
JM104999.1	---NA---	430	0			0	-
JM104644.1	---NA---	430	0			0	-
JM106198.1	---NA---	430	0			0	-
JM105112.1	---NA---	429	0			0	-
JM106572.1	---NA---	429	0			0	-
JM105479.1	---NA---	429	0			0	-
JM106362.1	---NA---	428	0			0	-
JM105067.1	---NA---	427	0			0	-
JM106113.1	---NA---	427	0			0	-
JM104713.1	---NA---	426	0			0	-
JM106482.1	aspartate aminotransferase	425	20	4.64e-62	0.968	4	F:pyridoxal phosphate binding; F:1-aminocyclopropane-1-carboxylate synthase activity; P:biosynthetic process; F:L-aspartate:2-oxoglutarate aminotransferase activity	EC:4.4.1.14; EC:2.6.1.1
JM106376.1	---NA---	425	0			0	-
JM105780.1	endonuclease-reverse transcriptase	425	9	6.76e-29	0.5756	0	-
JM105413.1	---NA---	425	0			0	-
JM106539.1	---NA---	423	0			0	-
JM105462.1	---NA---	423	0			0	-
JM105174.1	---NA---	422	0			0	-
JM104979.1	---NA---	421	0			0	-
JM104864.1	---NA---	421	0			0	-
JM104711.1	---NA---	420	0			0	-
JM106611.1	---NA---	420	0			0	-
JM106575.1	---NA---	420	0			0	-
JM106292.1	integral membrane protein	420	20	9.72e-60	0.9495	0	-
JM106664.1	reverse transcriptase-like protein	419	1	6.05e-13	0.54	0	-
JM106555.1	hypothetical protein SINV_10980 [Solenopsis invicta]	419	1	5.6e-15	0.65	0	-
JM105870.1	endonuclease-reverse transcriptase	419	3	3.09e-24	0.63	0	-
JM106789.1	PREDICTED: hypothetical protein LOC100575042 [Acyrthosiphon pisum]	418	1	3.4e-12	0.55	0	-
JM106457.1	---NA---	417	0			0	-
JM106019.1	---NA---	416	0			0	-
JM106455.1	---NA---	414	0			0	-
JM106399.1	---NA---	414	0			0	-
JM106122.1	---NA---	414	0			0	-
JM106117.1	gt334 protein	413	7	4.78e-19	0.6	0	-
JM105162.1	---NA---	412	0			0	-
JM105184.1	---NA---	412	0			0	-
JM104975.1	---NA---	411	0			0	-
JM105460.1	---NA---	411	0			0	-
JM106400.1	---NA---	409	0			0	-
JM106395.1	---NA---	409	0			0	-
JM106344.1	---NA---	409	0			0	-
JM105786.1	---NA---	409	0			0	-
JM105583.1	---NA---	407	0			0	-
JM105376.1	---NA---	406	0			0	-
JM105650.1	---NA---	405	0			0	-
JM105640.1	---NA---	404	0			0	-
JM104964.1	---NA---	402	0			0	-
JM105624.1	---NA---	402	0			0	-
JM105408.1	---NA---	402	0			0	-
JM105451.1	---NA---	401	0			0	-
JM106389.1	---NA---	400	0			0	-
JM106473.1	---NA---	399	0			0	-
JM106100.1	PREDICTED: similar to predicted protein [Hydra magnipapillata]	399	4	4.4e-20	0.565	0	-
JM105529.1	plasmid-partitioning protein	399	20	5.13e-61	0.8965	14	P:transmembrane transport; P:response to antibiotic; F:endopeptidase activity; C:integral to membrane; P:regulation of transcription, DNA-dependent; P:oxidation reduction; F:oxygen-dependent protoporphyrinogen oxidase activity; P:proteolysis; F:tetracycline:hydrogen antiporter activity; P:plasmid partitioning; P:tetracycline transport; F:transcription factor activity; F:nucleotide binding; C:cell…	EC:1.3.3.4
JM105122.1	---NA---	398	0			0	-
JM106578.1	---NA---	397	0			0	-
JM106358.1	---NA---	397	0			0	-
JM106309.1	zinc mym domain containing 1	397	20	3.31e-23	0.681	0	-
JM105091.1	---NA---	396	0			0	-
JM104985.1	---NA---	396	0			0	-
JM105261.1	transposase	395	20	3.09e-24	0.679	0	-
JM106671.1	---NA---	394	0			0	-
JM106284.1	---NA---	394	0			0	-
JM105654.1	---NA---	394	0			0	-
JM105264.1	---NA---	393	0			0	-
JM106702.1	---NA---	391	0			0	-
JM106422.1	---NA---	391	0			0	-
JM106365.1	endonuclease and reverse transcriptase-like protein	390	10	1.59e-14	0.594	0	-
JM105669.1	pol polyprotein	389	11	1.3e-16	0.61	6	F:RNA binding; F:nucleic acid binding; P:DNA integration; P:RNA-dependent DNA replication; F:RNA-directed DNA polymerase activity; F:DNA binding
JM106684.1	---NA---	388	0			0	-
JM106354.1	---NA---	388	0			0	-
JM106735.1	replication initiation protein	387	20	5.05e-61	0.93	4	F:DNA-directed DNA polymerase activity; P:plasmid maintenance; P:DNA replication initiation; C:extrachromosomal circular DNA	EC:2.7.7.7
JM106668.1	---NA---	387	0			0	-
JM106367.1	---NA---	387	0			0	-
JM105761.1	---NA---	387	0			0	-
JM106316.1	lactosylceramide 4-alpha-galactosyltransferase	386	20	1.03e-21	0.6425	1	F:transferase activity	-
JM106280.1	hit family protein	386	20	5.48e-23	0.884	6	F:kinase activity; C:integral to membrane; P:oxidation reduction; F:hydrolase activity; F:quinone binding; F:NADH dehydrogenase (ubiquinone) activity	EC:1.6.5.3
JM105155.1	beta-galactosidase alpha peptide	384	20	7.37e-36	0.9075	0	-
JM105057.1	---NA---	384	0			0	-
JM105011.1	---NA---	384	0			0	-
JM104796.1	---NA---	384	0			0	-
JM106676.1	---NA---	383	0			0	-
JM106435.1	---NA---	380	0			0	-
JM106199.1	---NA---	379	0			0	-
JM105735.1	---NA---	379	0			0	-
JM105477.1	---NA---	379	0			0	-
JM104799.1	tol-pal system beta propeller repeat protein	378	20	3.35e-20	0.8135	2	P:protein import; C:periplasmic space	-
JM106377.1	---NA---	378	0			0	-
JM105920.1	---NA---	377	0			0	-
JM105096.1	---NA---	376	0			0	-
JM105073.1	transient receptor potential cation channel subfamily m member 8	376	20	2.32e-29	0.8905	12	P:transmembrane transport; P:protein homotrimerization; C:external side of plasma membrane; C:integral to membrane; F:calcium channel activity; P:response to cold; F:receptor activity; P:cellular calcium ion homeostasis; P:calcium ion transport; P:protein homotetramerization; F:protein homodimerization activity; P:thermoception	-
JM106713.1	---NA---	374	0			0	-
JM104789.1	---NA---	373	0			0	-
JM105379.1	---NA---	372	0			0	-
JM104689.1	---NA---	371	0			0	-
JM105611.1	---NA---	369	0			0	-
JM104873.1	replicative dna helicase	366	17	3.5e-38	0.8382	4	P:DNA replication; F:DNA binding; F:ATP-dependent DNA helicase activity; F:ATP binding	-
JM106183.1	---NA---	365	0			0	-
JM104804.1	---NA---	364	0			0	-
JM106197.1	---NA---	363	0			0	-
JM106466.1	---NA---	361	0			0	-
JM104891.1	---NA---	359	0			0	-
JM104797.1	histone h2b	359	20	4.81e-19	0.9675	5	C:nucleosome; F:DNA binding; P:nucleosome assembly; C:lipid particle; C:NuA4 histone acetyltransferase complex	-
JM106521.1	---NA---	359	0			0	-
JM106185.1	---NA---	359	0			0	-
JM105912.1	---NA---	357	0			0	-
JM105158.1	hypothetical protein S18_1082_0001 [uncultured Flavobacteria bacterium]	355	2	8.8e-21	0.965	0	-
JM106530.1	---NA---	354	0			0	-
JM105971.1	---NA---	354	0			0	-
JM106770.1	reverse transcriptase	351	12	5.55e-15	0.5525	5	F:RNA binding; P:RNA-dependent DNA replication; F:RNA-directed DNA polymerase activity; F:nucleic acid binding; F:ribonuclease H activity
JM106514.1	---NA---	351	0			0	-
JM106241.1	---NA---	351	0			0	-
JM106597.1	polyribonucleotide nucleotidyltransferase	349	16	3.84e-32	0.7588	6	P:mRNA catabolic process; F:3'-5'-exoribonuclease activity; F:RNA binding; F:polyribonucleotide nucleotidyltransferase activity; C:mitochondrion; P:RNA processing	EC:2.7.7.8
JM106331.1	---NA---	348	0			0	-
JM105541.1	endonuclease-reverse transcriptase	348	1	9.83e-12	0.57	0	-
JM106596.1	sec15-like 1	347	2	4.57e-17	0.63	0	-
JM106320.1	---NA---	347	0			0	-
JM106293.1	---NA---	347	0			0	-
JM106125.1	---NA---	346	0			0	-
JM106069.1	---NA---	346	0			0	-
JM106216.1	Yokozuna [Bombyx mori]	345	1	6.31e-12	0.79	3	F:DNA binding; F:zinc ion binding; P:DNA integration	-
JM106544.1	---NA---	344	0			0	-
JM104994.1	---NA---	343	0			0	-
JM106696.1	---NA---	343	0			0	-
JM106119.1	---NA---	343	0			0	-
JM106242.1	---NA---	342	0			0	-
JM105968.1	---NA---	341	0			0	-
JM106452.1	---NA---	338	0			0	-
JM106370.1	---NA---	338	0			0	-
JM105045.1	---NA---	337	0			0	-
JM104722.1	endonuclease-reverse transcriptase	337	1	1.94e-12	0.73	0	-
JM105090.1	---NA---	335	0			0	-
JM105666.1	---NA---	335	0			0	-
JM105265.1	---NA---	335	0			0	-
JM106677.1	---NA---	334	0			0	-
JM106215.1	---NA---	334	0			0	-
JM105262.1	---NA---	332	0			0	-
JM105168.1	---NA---	331	0			0	-
JM104723.1	---NA---	331	0			0	-
JM106380.1	---NA---	330	0			0	-
JM104990.1	---NA---	329	0			0	-
JM104883.1	---NA---	329	0			0	-
JM106733.1	---NA---	329	0			0	-
JM106156.1	---NA---	329	0			0	-
JM105980.1	plasmid partition protein	329	20	1.31e-40	0.9565	12	F:endopeptidase activity; F:oxygen-dependent protoporphyrinogen oxidase activity; P:tetracycline transport; F:DNA binding; P:plasmid partitioning; C:cell outer membrane; P:transmembrane transport; P:oxidation reduction; C:integral to membrane; P:proteolysis; P:response to antibiotic; F:tetracycline:hydrogen antiporter activity	EC:1.3.3.4
JM106270.1	---NA---	328	0			0	-
JM105513.1	---NA---	328	0			0	-
JM104869.1	---NA---	327	0			0	-
JM105176.1	---NA---	326	0			0	-
JM106398.1	craniofacial development protein 2	324	20	8.25e-27	0.663	0	-
JM105868.1	---NA---	324	0			0	-
JM105835.1	---NA---	324	0			0	-
JM105757.1	---NA---	324	0			0	-
JM106324.1	---NA---	323	0			0	-
JM105346.1	---NA---	320	0			0	-
JM106698.1	---NA---	317	0			0	-
JM105166.1	---NA---	315	0			0	-
JM106220.1	---NA---	315	0			0	-
JM105447.1	---NA---	315	0			0	-
JM105256.1	---NA---	313	0			0	-
JM106628.1	---NA---	312	0			0	-
JM106569.1	---NA---	311	0			0	-
JM105163.1	---NA---	309	0			0	-
JM104978.1	ferrichrome-binding protein	309	4	6.44e-16	0.86	0	-
JM106375.1	---NA---	305	0			0	-
JM105448.1	---NA---	305	0			0	-
JM104727.1	abhydrolase domain containing 14a	302	20	7.41e-28	0.93	3	F:hydrolase activity; C:cytoplasm; C:integral to membrane	-
JM105097.1	sil1 protein	300	13	8.78e-21	0.7169	0	-
JM106323.1	---NA---	300	0			0	-
JM105703.1	---NA---	300	0			0	-
JM106247.1	---NA---	299	0			0	-
JM105046.1	---NA---	297	0			0	-
JM106158.1	---NA---	293	0			0	-
JM106459.1	---NA---	292	0			0	-
JM106405.1	---NA---	292	0			0	-
JM106204.1	---NA---	290	0			0	-
JM106067.1	---NA---	289	0			0	-
JM104960.1	---NA---	284	0			0	-
JM104992.1	---NA---	283	0			0	-
JM104646.1	---NA---	280	0			0	-
JM106543.1	---NA---	276	0			0	-
JM104863.1	---NA---	274	0			0	-
JM106118.1	---NA---	274	0			0	-
JM106357.1	---NA---	273	0			0	-
JM105630.1	---NA---	271	0			0	-
JM105427.1	---NA---	270	0			0	-
JM106277.1	---NA---	269	0			0	-
JM105195.1	---NA---	268	0			0	-
JM105000.1	---NA---	267	0			0	-
JM106243.1	---NA---	267	0			0	-
JM106519.1	---NA---	266	0			0	-
JM105311.1	---NA---	266	0			0	-
JM105987.1	phage uncharacterized protein	265	13	4.98e-40	0.8908	0	-
JM106723.1	---NA---	264	0			0	-
JM106366.1	---NA---	264	0			0	-
JM104974.1	aminoacylase 1	263	17	1.68e-11	0.9665	9	C:soluble fraction; F:metal ion binding; F:protein binding; P:protein catabolic process; F:aminoacylase activity; P:cellular amino acid metabolic process; P:proteolysis; C:cytosol; F:metallopeptidase activity	EC:3.5.1.14
JM105889.1	---NA---	263	0			0	-
JM104795.1	---NA---	255	0			0	-
JM106561.1	---NA---	255	0			0	-
JM106030.1	---NA---	255	0			0	-
JM105543.1	---NA---	255	0			0	-
JM105528.1	---NA---	255	0			0	-
JM105213.1	---NA---	254	0			0	-
JM106378.1	---NA---	253	0			0	-
JM106479.1	---NA---	252	0			0	-
JM105537.1	chloramphenicol acetyltransferase	251	3	1.21e-14	1	0	-
JM106017.1	---NA---	250	0			0	-
JM105962.1	---NA---	250	0			0	-
JM105239.1	unnamed protein product [Homo sapiens]	248	1	4.76e-27	1	0	-
JM106490.1	---NA---	247	0			0	-
JM105368.1	PBR [Burkholderia cenocepacia]	247	1	7.13e-15	0.89	0	-
JM106319.1	---NA---	246	0			0	-
JM105258.1	---NA---	246	0			0	-
JM106581.1	---NA---	244	0			0	-
JM106656.1	---NA---	243	0			0	-
JM106526.1	---NA---	241	0			0	-
JM106200.1	---NA---	239	0			0	-
JM105254.1	---NA---	238	0			0	-
JM105170.1	---NA---	237	0			0	-
JM104854.1	---NA---	237	0			0	-
JM106456.1	---NA---	232	0			0	-
JM106501.1	---NA---	231	0			0	-
JM105284.1	---NA---	231	0			0	-
JM106686.1	---NA---	229	0			0	-
JM106369.1	---NA---	227	0			0	-
JM105065.1	aminoacylase 1	226	20	2.6e-12	0.8955	9	C:soluble fraction; F:metal ion binding; F:protein binding; P:protein catabolic process; F:aminoacylase activity; P:cellular amino acid metabolic process; P:proteolysis; C:cytosol; F:metallopeptidase activity	EC:3.5.1.14
JM105161.1	---NA---	225	0			0	-
JM106497.1	---NA---	224	0			0	-
JM106115.1	---NA---	224	0			0	-
JM105765.1	---NA---	222	0			0	-
JM105310.1	---NA---	222	0			0	-
JM106073.1	---NA---	221	0			0	-
JM105533.1	---NA---	221	0			0	-
JM105898.1	---NA---	220	0			0	-
JM106518.1	---NA---	218	0			0	-
JM105560.1	---NA---	217	0			0	-
JM105030.1	---NA---	213	0			0	-
JM106612.1	---NA---	211	0			0	-
JM105926.1	---NA---	210	0			0	-
JM106272.1	---NA---	209	0			0	-
JM106614.1	---NA---	208	0			0	-
JM106613.1	---NA---	208	0			0	-
JM106480.1	---NA---	208	0			0	-
[truncated: 158 more rows]

## Sheet: Table S2
Table S2: prediction of Tribolium castaneum cadherin intron/exond boundaries
cDNA_Query	gDNA_Subject	Percent Identity	Length	cDNA_Query_Start	cDNA_Query_Stop	gDNA_Subject_Start	gDNA_Subject_Finish	Feature Type
XM_966295.2	189313713	1	175	1	175	175	1	<exon>GT
XM_966295.2	189313713	1	242	176	417	242	223	AG<exon>GT
XM_966295.2	189313713	1	105	418	522	105	513	AG<exon>GT
XM_966295.2	189313713	1	138	523	660	138	665	AG<exon>GT
XM_966295.2	189313713	1	132	661	792	132	847	AG<exon>GT
XM_966295.2	189313713	1	73	793	865	73	1025	AG<exon>GT
XM_966295.2	189313713	1	281	866	1146	281	1144	AG<exon>GT
XM_966295.2	189313713	1	171	1147	1317	171	1474	AG<exon>GT
XM_966295.2	189313713	1	200	1318	1517	200	1690	AG<exon>GT
XM_966295.2	189313713	1	214	1518	1731	214	1939	AG<exon>GT
XM_966295.2	189313713	1	173	1732	1904	173	2203	AG<exon>GT
XM_966295.2	189313713	1	173	1905	2077	173	3391	AG<exon>GT
XM_966295.2	189313713	1	166	2078	2243	166	3609	AG<exon>GT
XM_966295.2	189313713	1	178	2244	2421	178	3819	AG<exon>GT
XM_966295.2	189313713	1	151	2422	2572	151	4045	AG<exon>GT
XM_966295.2	189313713	1	305	2573	2877	305	4247	AG<exon>GT
XM_966295.2	189313713	1	234	2878	3111	234	4598	AG<exon>GT
XM_966295.2	189313713	1	126	3112	3237	126	4880	AG<exon>GT
XM_966295.2	189313713	1	210	3238	3447	210	5056	AG<exon>GT
XM_966295.2	189313713	1	414	3448	3861	414	5310	AG<exon>GT
XM_966295.2	189313713	1	93	3862	3954	93	5770	AG<exon>GT
XM_966295.2	189313713	1	205	3955	4159	205	5912	AG<exon>GT
XM_966295.2	189313713	1	113	4160	4272	113	6168	AG<exon>GT
XM_966295.2	189313713	1	158	4273	4430	158	6331	AG<exon>GT
XM_966295.2	189313713	1	201	4431	4631	201	6535	AG<exon>GT
XM_966295.2	189313713	1	165	4632	4796	165	6782	AG<exon>GT
XM_966295.2	189313713	1	85	4797	4881	85	6992	AG<exon>
Tribolium castaneum cadherin gene summary
exon size	180.78 bp
exon variance	72.83 bp
intron size	84.42 bp
intron variance	189.81 bp

## Sheet: Table S3
Table S3: prediction of Diabrotica virgifera virgifera cadherin intron/exond boundaries
cDNA_Query	gDNA_Subject	Percent Identity	Length	cDNA_Query_Start	cDNA_Query_Stop	gDNA_Subject_Start	gDNA_Subject_Finish	Feature Type
EF531715.1	EF541349.1	1	160	1	160	2372	2531	<exon>GT
EF531715.1	EF541349.1	1	57	161	217	3763	3819	AG<exon>GT
EF531715.1	EF541349.1	1	165	218	382	4783	4947	AG<exon>GT
EF531715.1	EF541349.1	1	224	383	606	8833	9056	AG<exon>GT
EF531715.1	EF541349.1	1	105	607	711	14056	14160	AG<exon>GT
EF531715.1	EF541349.1	1	138	712	849	17132	17269	AG<exon>GT
EF531715.1	EF541349.1	1	123	850	972	17925	18047	AG<exon>GT
EF531715.1	EF541349.1	1	82	973	1054	20529	20610	AG<exon>GT
EF531715.1	EF541349.1	1	332	1055	1386	24357	24688	AG<exon>GT
EF531715.1	EF541349.1	1	180	1387	1566	29401	29580	AG<exon>GT
EF531715.1	EF541349.1	1	197	1567	1763	34049	34245	AG<exon>GT
EF531715.1	EF541349.1	1	211	1764	1974	36236	36446	AG<exon>GT
EF531715.1	EF541349.1	1	179	1975	2153	38350	38528	AG<exon>GT
EF531715.1	EF541349.1	1	182	2154	2335	40590	40771	AG<exon>GT
EF531715.1	EF541349.1	1	166	2336	2501	42114	42279	AG<exon>GT
EF531715.1	EF541349.1	1	160	2502	2661	48059	48218	AG<exon>GT
EF531715.1	EF541349.1	1	133	2662	2794	51342	51474	AG<exon>GT
EF531715.1	EF541349.1	1	171	2795	2965	52579	52749	AG<exon>GT
EF531715.1	EF541349.1	1	122	2966	3087	54944	55065	AG<exon>GT
EF531715.1	EF541349.1	1	237	3088	3324	61522	61758	AG<exon>GT
EF531715.1	EF541349.1	1	132	3325	3456	66120	66251	AG<exon>GT
EF531715.1	EF541349.1	1	142	3457	3598	68887	69028	AG<exon>GT
EF531715.1	EF541349.1	1	104	3599	3702	71167	71270	AG<exon>GT
EF531715.1	EF541349.1	1	414	3703	4116	74776	75189	AG<exon>GT
EF531715.1	EF541349.1	1	102	4117	4218	80115	80216	AG<exon>GT
EF531715.1	EF541349.1	1	229	4219	4447	83333	83561	AG<exon>GT
EF531715.1	EF541349.1	1	110	4448	4557	85074	85183	AG<exon>GT
EF531715.1	EF541349.1	1	194	4558	4751	86981	87174	AG<exon>GT
EF531715.1	EF541349.1	1	201	4752	4952	89382	89582	AG<exon>GT
EF531715.1	EF541349.1	1	180	4953	5132	91404	91583	AG<exon>GT
EF531715.1	EF541349.1	1	239	5133	5371	94423	94661	AG<exon>
Diabrotica virgifera virgifera cadherin gene summary
exon size	173.25 bp
exon variance	71.21 bp
intron size	2897.30 bp
intron variance	1501.06 bp

## Sheet: Table S4
Table S4: Predicted position and strand ( + or -) of putative miniature inverted repeat transpoable elements (MITEs) within introns of the Diabrotica virgifera virgifera cadherin gene.
Sequence_Query	Hit Start	Hit End	Strand	Length of Hit	Direct Repeat (DR) Length	DR (left)	DR (right)	Terminal Inverted Repeat (TIR)	TIR (left)	TIR (right)	MITE %A+T
EF541349.1	782	938	+	157	2	TT	TT	10	ATAATTAATA	TATTAATAAT	0.778481
EF541349.1	1045	1279	+	235	2	AA	AA	12	ATACAGGGTATT	AATACCCCGTAT	0.737288
EF541349.1	1422	1641	+	220	2	GC	GC	12	TAATTTTGTAAT	ATTACAAAATTT	0.678733
EF541349.1	4305	4783	+	479	2	CA	CA	10	CCTACAAAAG	CTTTTTTAGG	0.529167
EF541349.1	5528	5663	+	136	2	AA	AA	9	TGTAGTAAG	CTTAGTACA	0.627737
EF541349.1	5855	6341	+	487	2	AA	AA	11	TGTATACCAAA	TTTGTTATACA	0.643443
EF541349.1	6951	7412	+	462	2	TA	TA	31	TAACATTACAAACCTTTATATTTTTGTGATG	CATCACAAAAATATAAAGGTTTGTTATGTTA	0.701944
EF541349.1	8418	8700	+	283	2	AA	AA	12	ATGAAAATATCT	AGATGTTTTCAT	0.651408
EF541349.1	10448	10588	+	141	2	AA	AA	10	TATATCAAAA	TTTTGTTATA	0.739437
EF541349.1	11298	11498	+	201	2	TT	TT	9	TTCTATGTT	AACATAGAT	0.608911
EF541349.1	11602	12026	+	425	2	TG	TG	9	TATATATTC	GAATATGTA	0.63615
EF541349.1	12756	12959	+	204	2	AA	AA	9	CATAGATTT	AAATCTATG	0.658537
EF541349.1	14464	14664	-	201	2	TG	TG	10	ATATTTAGAT	ATATAAATAT	0.717822
EF541349.1	15227	15611	-	385	2	TG	TG	10	GCCAATTTTT	AAAACTTGGC	0.567358
EF541349.1	16643	16819	+	177	2	TG	TG	9	TTCCATAAT	ATTTTGGAA	0.662921
EF541349.1	19416	19621	+	206	2	CT	CT	10	GCCATTATAA	TTATATTGGC	0.608696
EF541349.1	20190	20395	+	206	2	AT	AT	12	GGGCAAACAATA	TATTGTTTGTCC	0.570048
EF541349.1	20815	21242	+	428	2	AT	AT	12	CTTTGTATGTAA	TTACATACAAAT	0.787879
EF541349.1	21987	22480	+	494	2	TG	TG	11	TAAATAATCAT	ATGATTATTTT	0.577778
EF541349.1	23384	23716	+	333	2	GT	GT	13	ATTATTATATTTT	AAAATATAAAAAT	0.631737
EF541349.1	24729	24865	+	137	2	AT	AT	15	TAATATACAGCTCAG	CTGAGCTGAATATTA	0.641618
EF541349.1	25417	25911	+	495	2	AT	AT	37	ACAGGGTTGGTCGAAACTCGGAATGAGTATTTTCTGA	TCAGAAAATACTCATTCCGAGTTTCGACCCACCCTGT	0.685484
EF541349.1	26492	26656	+	165	2	TG	TG	9	ACTTTCTTA	TAAGAAAGT	0.638554
EF541349.1	27763	28199	+	437	2	AT	AT	11	TTTTTTCCTTA	TAAGCAAAAAA	0.646119
EF541349.1	28281	28403	+	123	2	AT	AT	8	CAATGTTT	AAACTTTG	0.653226
EF541349.1	29817	30280	+	464	2	TA	TA	9	ATATTGTTG	CAACAATAT	0.634409
EF541349.1	30402	30634	+	233	2	TA	TA	11	GGCAGGACCCT	AGGGTCCTGGC	0.393162
EF541349.1	31830	32299	+	470	2	AT	AT	44	CTTATGGAAAATATAATGTCACTCAAATTCAATAAAATTTATAC	GTATAAATTTTATTGAATTTGAGTGACATTATATTTTCCATAAG	0.70276
EF541349.1	34598	34760	+	163	2	TA	TA	10	ATTAAATTGT	ACAATTTAAC	0.768293
EF541349.1	34816	34916	+	101	2	AT	AT	11	TTAAATAAACA	TGTTTATTTTA	0.754902
EF541349.1	35123	35526	-	404	2	CA	CA	11	CTTAATAAAAA	TTTTTATAAAG	0.661728
EF541349.1	35759	35864	+	106	2	AA	AA	13	AACATAATTGATT	AATCAATTATGTC	0.850467
EF541349.1	36090	36224	+	135	2	TT	TT	12	TATATATGTACA	TGTACATATATT	0.639706
EF541349.1	36723	36852	+	130	2	AA	AA	20	AAAAATTAGTCAAAAATCAT	ATGATTTTTGACTAGTTTTT	0.603053
EF541349.1	37257	37558	+	302	2	AT	AT	11	ATTAATATTTT	AAAATATTAAA	0.49505
EF541349.1	41366	41714	+	349	2	AA	AA	12	AAATATGAAACG	CGTTTCATTTTT	0.742857
EF541349.1	43766	43923	+	158	2	AT	AT	11	TTATTAAAAAT	ATTTTTCATAA	0.779874
EF541349.1	44623	44916	+	294	2	CA	CA	11	AAAACAATTTT	AAAATGGTTTT	0.569492
EF541349.1	44982	45465	+	484	2	TT	TT	10	TTAATAGAAG	CTTCTATTAT	0.494845
EF541349.1	46735	47063	+	329	2	GT	GT	11	TTCATTCTTAT	ATAAGAATTAA	0.642424
EF541349.1	47524	47991	-	468	2	AA	AA	12	ATTTAAAATATA	TATATTTTAAAG	0.716418
EF541349.1	48274	48639	+	366	2	CA	CA	12	TCATCATTTGTC	GACAAAAGATGA	0.599455
EF541349.1	48988	49212	+	225	2	AA	AA	9	AACCCCCAA	TTAGGGGTT	0.659292
EF541349.1	49256	49567	+	312	2	TG	TG	9	TCTTTAGAA	TTATAAAGA	0.600639
EF541349.1	52380	52653	+	274	2	CC	CC	11	TATGAATATAG	CTATATTGATA	0.749091
EF541349.1	52833	53120	+	288	2	TA	TA	11	TCTGATATAAA	TTTATATTAGA	0.705882
EF541349.1	53180	53446	+	267	2	AT	AT	16	TAATTAATTTTGTAAT	ATTACAAAATTAGTTA	0.705224
EF541349.1	54809	54936	+	128	2	TT	TT	11	ATTAACTTTTA	TAAAATTTAAT	0.728682
EF541349.1	55875	56041	+	167	2	AT	AT	9	TGTCTTCTC	GAGAAGAGA	0.571429
EF541349.1	58838	59126	+	289	2	AA	AA	9	GTAATAAGG	CCTTATTAG	0.662069
EF541349.1	60594	60881	+	288	2	TA	TA	12	TATATATATTAA	TTAATATAAATA	0.771626
EF541349.1	63022	63493	+	472	2	CA	CA	13	TTTTTTGAAAAAA	TTTTTTCGAAAAA	0.744186
EF541349.1	64125	64578	+	454	2	CT	CT	9	AGCTACATT	AAGGTAGCT	0.632967
EF541349.1	64626	65025	+	400	2	CA	CA	10	TAGTTATTAT	ATAATATCTA	0.680798
EF541349.1	65036	65456	+	421	2	TT	TT	9	GTGTAAAAA	TTTTTTCAC	0.691943
EF541349.1	66765	66879	+	115	2	AT	AT	9	GATCTATTT	AAATCGATC	0.646552
EF541349.1	67468	67769	+	302	2	TA	TA	9	AATTAAATA	TATATAATT	0.425743
EF541349.1	69823	70123	-	301	2	TA	TA	10	ATTAAAAACA	TGTTATTAAT	0.5
EF541349.1	71307	71632	+	326	2	TT	TT	10	ATCAGAAAAA	TTTTACTGAT	0.623853
EF541349.1	71866	72221	+	356	2	TT	TT	9	AGGCACATT	AAAGTGCCT	0.635854
EF541349.1	72494	72647	+	154	2	AC	AC	14	ATATCGAATTTAAA	TTTAAATTCAATAT	0.806452
EF541349.1	73019	73394	+	376	2	AT	AT	24	TGTCAAAATTTATAAAAATGGTAA	TTACCATTTTTATAAATTTTGACA	0.546419
EF541349.1	73846	74081	+	236	2	GT	GT	11	TGTGAAAAAAT	ATTTTTTAACA	0.654008
EF541349.1	75820	76243	+	424	2	AC	AC	14	GGTTTTATTCTTTA	TAAAGAATAAAACC	0.663529
EF541349.1	76282	76401	+	120	2	TC	TC	10	AAAAAAGAAA	TTTCTTTTCT	0.68595
EF541349.1	77394	77581	+	188	2	CG	CG	10	TCAGATTATT	AAAAATCTGA	0.645503
EF541349.1	77690	77853	+	164	2	TC	TC	16	AATATTTTTCAAAAAT	ATTTTTGAAAAATATA	0.690909
EF541349.1	77982	78212	+	231	2	AA	AA	11	ACATTTTTTCG	CGAAAATATGT	0.642241
EF541349.1	78635	78739	+	105	2	AG	AG	8	ATTGTGAA	TTCAAAAT	0.688679
EF541349.1	79132	79388	+	257	2	TT	TT	9	AATTTAGTT	AACGAAATT	0.74031
EF541349.1	79439	79609	+	171	2	TT	TT	9	GTGACGTCA	TGACGTCAC	0.656977
EF541349.1	81101	81233	+	133	2	AA	AA	9	TAATATTTT	AAAATTTTA	0.679105
EF541349.1	81318	81504	+	187	2	TC	TC	9	TGAAAATAT	AAATTTTCA	0.659574
EF541349.1	83184	83667	+	484	2	AA	AA	11	AAAGTAAATCC	GGATTTACTTG	0.674227
EF541349.1	83944	84094	+	151	2	GA	GA	13	AAAATATGCATTT	AAATGCATAATTT	0.743421
EF541349.1	84113	84518	+	406	2	AA	AA	11	TAACGGGAAAA	TTTTACCGTTA	0.545455
EF541349.1	84612	84909	+	298	2	TT	TT	9	TAGCATCCA	TGGATCCTA	0.64214
EF541349.1	85666	85823	+	158	2	A	AT	9	TTGGGTCAT	ATGACCAAA	0.54717
EF541349.1	87038	87252	+	215	2	AT	AT	11	ACAGTAACAAA	TTTGTCACTGT	0.638889
EF541349.1	87432	87563	+	132	2	AA	AA	10	TAAACATTTT	AAAATATTTA	0.759399
EF541349.1	88022	88427	+	406	2	TT	TT	12	AAATTATTTTAA	TTAACATAATTT	0.710074
EF541349.1	88817	89278	-	462	2	TA	TA	15	ATCGATTCTAAACAT	ATGTTTAAAATCGAT	0.721382
EF541349.1	89973	90308	+	336	2	CC	CC	10	TTATAAAGTT	AACTTTCTAA	0.623145
EF541349.1	90992	91093	+	102	2	AT	AT	10	TTTCAATATT	AATATAGAAA	0.669903
EF541349.1	91835	91987	-	153	2	AC	AC	9	AAACCTTAT	ATAAGATTT	0.649351
EF541349.1	1662	1949	+	288	3	AAC	AAC	9	CAAGCCAAG	CTTAGCTTG	0.546713
EF541349.1	4902	5123	+	222	3	GTA	GTA	10	ATACCAACTC	GAGTTGATAT	0.650224
EF541349.1	8001	8288	+	288	3	ATT	ATT	15	AAAAATATTTTATTA	TAATAAATTATTTTT	0.820069
EF541349.1	10000	10428	+	429	3	TTT	TTT	11	ATTTGTAAAAG	CTTATACAAAT	0.518605
EF541349.1	12294	12431	+	138	3	TTT	TTT	11	CGCAGTGTTAA	TTAACACTGAG	0.568345
EF541349.1	13675	14116	+	442	3	GAT	GAT	10	CTTCGGGATC	GATCCCGACG	0.638826
EF541349.1	15683	15791	+	109	3	TGC	TGC	8	AAGACGAT	ATTGTCTT	0.681818
EF541349.1	15980	16117	+	138	3	GAA	GAA	8	TTTCATGA	TCATGACA	0.561151
EF541349.1	17103	17298	+	196	3	CAA	CAA	10	AATAGATAAT	ATTATCTAAT	0.720812
EF541349.1	18811	19253	+	443	3	GAA	GAA	10	AATAAAAATA	TATTTTTATA	0.682432
EF541349.1	22530	22824	+	295	3	AAA	AAA	10	TAGCATTTGT	ACATATGCTA	0.584459
EF541349.1	24876	25174	+	299	3	TTT	TTT	13	TATATACAGGGTG	CACCCTGTATATT	0.593333
EF541349.1	26355	26478	+	124	3	CTG	CTG	13	CTGAGCTGCGTGC	GCACGCCGCTCAG	0.632
EF541349.1	29676	29775	+	100	3	ACC	ACC	11	AAAAATACACT	AGTGAATTTTT	0.673267
EF541349.1	31158	31372	+	215	3	TTA	TTA	18	TGCCTGGTTGCACCAACA	TGTTGGTGCAATCAGGCA	0.592593
EF541349.1	31462	31651	+	190	3	AAA	AAA	10	ATTTTATAAA	TTTATAATAT	0.727749
EF541349.1	36290	36411	+	122	3	TGG	TGG	9	AAATATTAA	TTAACATTT	0.658537
EF541349.1	37978	38268	+	291	3	TTT	TTT	10	TTTTTATTTT	AAAATAAAAA	0.743151
EF541349.1	39179	39409	+	231	3	TTA	TTA	11	AAATAATTAAT	ATTAATAATTT	0.668103
EF541349.1	40677	40787	+	111	3	CAA	CAA	10	GCCAGATTTT	AAAGTCTGGC	0.660714
EF541349.1	40818	40936	+	119	3	CAG	CAG	13	CTGAGCGGGGTGC	GCACCCCACTCAG	0.608333
EF541349.1	42475	42599	+	125	3	GCT	GCT	13	GCCCCCCCCCACT	AGTGGGGGGGGGA	0.555556
EF541349.1	53737	54041	+	305	3	AAT	AAT	15	AAAAATAATTTATTA	TAATAAAATATTTTT	0.810458
EF541349.1	56119	56248	+	130	3	TAC	TAC	10	CTGAGATCAT	ATGATCTGAG	0.534351
EF541349.1	57705	57866	+	162	3	GGA	GGA	9	TGTCTCTTC	GAAGAGACG	0.245399
EF541349.1	58238	58690	+	453	3	GAT	GAT	9	TTTTGCCAA	TTGGAAAAA	0.627753
EF541349.1	59223	59526	+	304	3	TCT	TCT	10	TCAACAAATG	CATTTATTGA	0.606557
EF541349.1	59583	59719	+	137	3	CCA	CCA	9	CGATAGGCA	TGCTTATCG	0.601449
EF541349.1	62737	62893	+	157	3	AAA	AAA	13	TAACCAAAAAAAT	ATTTTTTTGGTAA	0.721519
EF541349.1	65815	66279	+	465	3	TTG	TTG	10	GTTTTACATT	AATTTAAAAC	0.706009
EF541349.1	67245	67430	+	186	3	CCA	CCA	10	AAATTATTAC	GTAATTATTT	0.609626
EF541349.1	68383	68503	+	121	3	TCT	TCT	10	TTTAATGTAG	CTACATTATA	0.688525
EF541349.1	74294	74777	+	484	3	AAC	AAC	10	TGCTGAAAAT	ATTTTCAGCT	0.593814
EF541349.1	76656	76952	+	297	3	AAT	AAT	8	TACCAATT	AAATGGTA	0.426174
EF541349.1	78807	79021	+	215	3	ACT	ACT	10	TGTTTAAGAT	ATCATAAACA	0.712963
EF541349.1	85315	85486	+	172	3	TAC	TAC	11	TCCTTAATAAA	TTTATTATGGA	0.728324
EF541349.1	86106	86302	+	197	3	TAA	TAA	9	AATATTTAT	ATAAATATC	0.681818
EF541349.1	86420	86560	+	141	3	ATA	ATA	10	GTTTGCAATA	TATTACAAAC	0.746479
EF541349.1	87664	87807	+	144	3	CCG	CCG	17	CCGGTTCATCGCCAGTC	GACTGGCGATGAATCGG	0.62069
EF541349.1	91294	91744	+	451	3	ATT	ATT	11	AACCTTTCATT	AATGAAAGATT	0.699115
EF541349.1	2413	2638	+	226	4	TAAA	TAAA	10	ACTTTTTTCA	TGTAAAAAGT	0.726872
EF541349.1	26987	27438	+	452	4	TTTT	TTTT	11	AAATCATCGAT	ATCGAGGATTT	0.582781
EF541349.1	27439	27655	+	217	4	ATTT	ATTT	11	TTTTATTATTA	TAATAATAAAG	0.779817
EF541349.1	32829	33235	+	407	4	CAAA	CAAA	10	TAATTTTAAT	ATTAAAATTC	0.651961
EF541349.1	34384	34509	+	126	4	TTTA	TTTA	20	ATTTTAACTATTTATAATGG	CCATTATAAATAGTTAAAAG	0.779528
EF541349.1	37682	37944	+	263	4	TTTT	TTTT	11	AAGTTTTATAT	ATATAAAATTT	0.746212
EF541349.1	42051	42443	+	393	4	TTTT	TTTT	10	GGGTCTTTTT	AAAAATACCC	0.65736
EF541349.1	43236	43413	+	178	4	AAAG	AAAG	10	ACAAATTAAA	TTTAATTCGT	0.787709
EF541349.1	47360	47469	+	110	4	TTTG	TTTG	12	TCATTTTTTTTT	AAAAAAAAATAA	0.756757
EF541349.1	49638	49905	+	268	4	ATAA	ATAA	8	CAATAGGT	ACGTATTG	0.598513
EF541349.1	51530	51817	+	288	4	CTTA	CTTA	11	TATTTTTTATT	AATAAAAGATA	0.688581
EF541349.1	57487	57587	+	101	4	GACT	GACT	10	TTATAATAAA	TTTATAATAA	0.696078
EF541349.1	61131	61483	+	353	4	ATAA	ATAA	12	TTTTTCTAATAA	t TTATTAAAAAAA	0.644068
EF541349.1	61951	62171	+	221	4	GGCT	GGCT	18	GCACATCAAAGAAACATG	CATGTTTCTTTGGTGTGC	0.648649
EF541349.1	63841	64106	+	266	4	TAGT	TAGT	10	TTTTCTTAAA	TTTTAGAAAA	0.378277
EF541349.1	82139	82405	+	267	4	TTTC	TTTC	9	CGAATAGAG	CACTATTCG	0.578358
EF541349.1	85062	85225	+	164	4	CGAA	CGAA	9	ACTGTATTT	ATATACAGT	0.69697
EF541349.1	90540	90715	+	176	4	TAAT	TAAT	8	TTATATCC	GGATATCA	0.627119
EF541349.1	92039	92173	+	135	4	TGAA	TGAA	10	TTTGGATCAA	TTGATGCAAA	0.602941
EF541349.1	92991	93439	+	449	4	TTTT	TTTT	10	AAATATATTT	AAAAATATTT	0.695556
EF541349.1	93559	93751	+	193	4	GATA	GATA	9	TAAACGAAA	TTTTGTTTA	0.675258

## Sheet: Table S5
Table S5: Predicted position and strand ( + or -) of putative miniature inverted repeat transpoable elements (MITEs) within introns of the Tribolium castaneum cadherin gene.
Sequence_Query	Hit Start	Hit End	Strand	Length of Hit	Direct Repeat (DR) Length	DR (left)	DR (right)	Terminal Inverted Repeat (TIR)	TIR (left)	TIR (right)	MITE %A+T
189313713:c19140128-19133053	752	1121	+	370	2	AA	AA	11	CAACTAAACTA	TAGTTTAGTTC	0.609164
189313713:c19140128-19133053	1306	1796	+	491	4	TATT	TATT	11	ACGACAATATC	GATATTGACGT	0.623984
189313713:c19140128-19133053	2255	2394	+	140	4	GAAG	GAAG	10	CTACAATTAC	GTACTTGTAG	0.567376
189313713:c19140128-19133053	2670	2989	+	320	2	TT	TT	11	AAATGATAATT	AATTATCAATT	0.744548
189313713:c19140128-19133053	3046	3252	+	207	5	AAGTT	AATTT	16	GTAAAGAATTAAATTT	AAATTTAATTCTCTAC	0.605769
189313713:c19140128-19133053	3753	3905	+	153	2	AG	AG	10	ACAACATCAC	GTGATGTTAT	0.616883
189313713:c19140128-19133053	4195	4515	+	321	2	AC	AC	9	GGTAAAAAC	GTTGTTACC	0.57764
189313713:c19140128-19133053	4578	4830	-	253	3	CGT	CGT	10	TTAATTATAA	TTACAATTAA	0.562992
189313713:c19140128-19133053	4869	5297	+	429	3	ATT	ATT	10	TTTAATTCCA	TGGGATTAAA	0.593023
189313713:c19140128-19133053	5378	5822	+	445	2	AA	AA	9	GAACTGTAC	GTACATTTC	0.591928
189313713:c19140128-19133053	6330	6783	+	454	3	TCA	TCA	11	GATTAAAACCA	TGGTTTTAGTC	0.56044
189313713:c19140128-19133053	6803	6926	+	124	3	AAA	AAA	8	ATTATCAA	TTGATACT	0.504
